# Supplementary material
Source: publisher figshare collection journal article supplement (https://acs.figshare.com/ndownloader/files/5025250)
Supplement: Supplementary file 1 [file 5025250]

 
data_1
 
_audit_creation_method            SHELXL-2013
_audit_creation_date              2014-11-10
_audit_block_code                 WGT-WM-088-01
_chemical_name_systematic
;
 ?
;
_chemical_name_common             ?
_chemical_melting_point           ?
_chemical_compound_source         'thf, diethylether'
_chemical_formula_moiety          
 'C32 H39 Cl3 N2 P Re, C4 H10 O' 
_chemical_formula_sum
 'C36 H49 Cl3 N2 O P Re' 
_chemical_formula_weight          849.29

loop_
 _atom_type_symbol
 _atom_type_description
 _atom_type_scat_dispersion_real
 _atom_type_scat_dispersion_imag
 _atom_type_scat_source
 'C'  'C'   0.0033   0.0016
 'International Tables Vol C Tables 4.2.6.8 and 6.1.1.4'
 'H'  'H'   0.0000   0.0000
 'International Tables Vol C Tables 4.2.6.8 and 6.1.1.4'
 'N'  'N'   0.0061   0.0033
 'International Tables Vol C Tables 4.2.6.8 and 6.1.1.4'
 'O'  'O'   0.0106   0.0060
 'International Tables Vol C Tables 4.2.6.8 and 6.1.1.4'
 'P'  'P'   0.1023   0.0942
 'International Tables Vol C Tables 4.2.6.8 and 6.1.1.4'
 'Re'  'Re'  -1.0185   7.2310
 'International Tables Vol C Tables 4.2.6.8 and 6.1.1.4'
 'Cl'  'Cl'   0.1484   0.1585
 'International Tables Vol C Tables 4.2.6.8 and 6.1.1.4'
 
_space_group_crystal_system       orthorhombic
_space_group_IT_number            33
_space_group_name_H-M_alt         'P n a 21'
_space_group_name_Hall            'P 2c -2n'
 
_shelx_space_group_comment
;
The symmetry employed for this shelxl refinement is uniquely defined
by the following loop, which should always be used as a source of
symmetry information in preference to the above space-group names.
They are only intended as comments.
;
 
loop_
 _space_group_symop_operation_xyz
 'x, y, z'
 '-x, -y, z+1/2'
 'x+1/2, -y+1/2, z'
 '-x+1/2, y+1/2, z+1/2'
 
_cell_length_a                    12.9789(14)
_cell_length_b                    15.359(2)
_cell_length_c                    18.263(2)
_cell_angle_alpha                 90
_cell_angle_beta                  90
_cell_angle_gamma                 90
_cell_volume                      3640.6(7)
_cell_formula_units_Z             4
_cell_measurement_temperature     100(2)
_cell_measurement_reflns_used     9905
_cell_measurement_theta_min       3.0330
_cell_measurement_theta_max       29.0963
 
_exptl_crystal_description        plate
_exptl_crystal_colour             red
_exptl_crystal_size_max           0.07
_exptl_crystal_size_mid           0.05
_exptl_crystal_size_min           0.02
_exptl_crystal_density_meas       ? 
_exptl_crystal_density_method     ?              
_exptl_crystal_density_diffrn     1.550          
_exptl_crystal_F_000              1712
_exptl_transmission_factor_min    ?                                             
_exptl_transmission_factor_max    ?                                             
_exptl_absorpt_coefficient_mu     3.632
_shelx_estimated_absorpt_T_min    0.785
_shelx_estimated_absorpt_T_max    0.931
_exptl_absorpt_correction_type    gaussian
_exptl_absorpt_process_details    'SADABS (Bruker AXS, 2012)' 
_exptl_absorpt_correction_T_min   0.75873
_exptl_absorpt_correction_T_max   0.93824
 
_exptl_special_details
;
 ?
;
 
_diffrn_ambient_temperature       100(2)
_diffrn_radiation_wavelength      0.71073
_diffrn_radiation_type            MoK\a
_diffrn_source                    '1\mS'
_diffrn_radiation_monochromator   'Incoatec Helios mirrors'
_diffrn_measurement_device_type   'Bruker-AXS Kappa Mach3 APEX-II'
_diffrn_measurement_method        'CCD \f- and \w-scans'
_diffrn_detector_area_resol_mean  66.67
_diffrn_reflns_number             100886
_diffrn_reflns_av_unetI/netI      0.0534
_diffrn_reflns_av_R_equivalents   0.1023
_diffrn_reflns_limit_h_min        -18
_diffrn_reflns_limit_h_max        18
_diffrn_reflns_limit_k_min        -21
_diffrn_reflns_limit_k_max        21
_diffrn_reflns_limit_l_min        -26
_diffrn_reflns_limit_l_max        26
_diffrn_reflns_theta_min          3.033
_diffrn_reflns_theta_max          30.718
_diffrn_reflns_theta_full         25.242
_diffrn_measured_fraction_theta_max   0.994
_diffrn_measured_fraction_theta_full  0.998
_diffrn_reflns_Laue_measured_fraction_max    0.994
_diffrn_reflns_Laue_measured_fraction_full   0.998
_diffrn_reflns_point_group_measured_fraction_max   0.994
_diffrn_reflns_point_group_measured_fraction_full  0.999
_reflns_number_total              11239
_reflns_number_gt                 8739
_reflns_threshold_expression      'I > 2\s(I)'
_reflns_Friedel_coverage          0.945
_reflns_Friedel_fraction_max      0.995
_reflns_Friedel_fraction_full     0.999
 
_reflns_special_details
;
 Reflections were merged by SHELXL according to the crystal
 class for the calculation of statistics and refinement.
 
 _reflns_Friedel_fraction is defined as the number of unique
 Friedel pairs measured divided by the number that would be
 possible theoretically, ignoring centric projections and
 systematic absences.
;
 
_computing_data_collection        'APEX2 (Bruker AXS, 2005-2013)'
_computing_cell_refinement        'SAINT software (Bruker AXS, 2004)'
_computing_data_reduction         'SAINT software (Bruker AXS, 2004)'
_computing_structure_solution     'SHELXS (G. M. Sheldrick, 2013)'
_computing_structure_refinement   'SHELXL (G. M. Sheldrick, 2013)'
_computing_molecular_graphics     ?
_computing_publication_material   ?
 
_refine_special_details
;
 Refined as a 2-component inversion twin in Pna2(1).
Refinement in centrosymmetric space group Pnma leads to 1:1 disorder of 
cyclohexyl and  phenyl rings. 
;
_refine_ls_structure_factor_coef  Fsqd
_refine_ls_matrix_type            full
_refine_ls_weighting_scheme       calc
_refine_ls_weighting_details
;
 w=1/[\s^2^(Fo^2^)+(0.0372P)^2^+5.4818P]
 where P=(Fo^2^+2Fc^2^)/3
;
_atom_sites_solution_primary      direct
_atom_sites_solution_secondary    difmap
_atom_sites_solution_hydrogens    geom
_refine_ls_hydrogen_treatment     constr
_refine_ls_extinction_method      none
_refine_ls_extinction_coef        .
_refine_ls_abs_structure_details
;
 Refined as an inversion twin.
;
_refine_ls_abs_structure_Flack    0.312(14)
_chemical_absolute_configuration  ?
_refine_ls_number_reflns          11239
_refine_ls_number_parameters      414
_refine_ls_number_restraints      8
_refine_ls_R_factor_all           0.0601
_refine_ls_R_factor_gt            0.0365
_refine_ls_wR_factor_ref          0.0827
_refine_ls_wR_factor_gt           0.0734
_refine_ls_goodness_of_fit_ref    1.020
_refine_ls_restrained_S_all       1.019
_refine_ls_shift/su_max           0.003
_refine_ls_shift/su_mean          0.000
 
loop_
 _atom_site_label
 _atom_site_type_symbol
 _atom_site_fract_x
 _atom_site_fract_y
 _atom_site_fract_z
 _atom_site_U_iso_or_equiv
 _atom_site_adp_type
 _atom_site_occupancy
 _atom_site_site_symmetry_order  
 _atom_site_calc_flag
 _atom_site_refinement_flags_posn
 _atom_site_refinement_flags_adp
 _atom_site_refinement_flags_occupancy
 _atom_site_disorder_assembly
 _atom_site_disorder_group
Re Re 1.04787(2) 0.15733(2) 0.00157(8) 0.01125(6) Uani 1 1 d . . . . .
Cl1 Cl 1.13460(12) 0.29597(10) -0.0035(2) 0.0162(4) Uani 1 1 d . . . . .
Cl2 Cl 1.1540(3) 0.1085(2) -0.09652(15) 0.0153(7) Uani 1 1 d . . . . .
Cl3 Cl 1.1589(3) 0.1045(2) 0.09507(15) 0.0171(7) Uani 1 1 d . . . . .
N1 N 0.9364(8) 0.2100(8) -0.0647(6) 0.011(2) Uani 1 1 d . . . . .
C2 C 0.8691(12) 0.2612(10) -0.0322(8) 0.020(3) Uani 1 1 d . . . . .
H2 H 0.8202 0.2951 -0.0584 0.024 Uiso 1 1 calc R U . . .
C3 C 0.8760(12) 0.2615(10) 0.0440(7) 0.018(3) Uani 1 1 d . . . . .
H3 H 0.8286 0.2937 0.0729 0.021 Uiso 1 1 calc R U . . .
N4 N 0.9502(7) 0.2156(8) 0.0745(6) 0.013(2) Uani 1 1 d . . . . .
C5 C 0.9624(7) 0.2178(8) 0.1560(6) 0.015(2) Uani 1 1 d . . . . .
H5 H 0.9845 0.1584 0.1719 0.018 Uiso 1 1 calc R U . . .
C6 C 0.8647(6) 0.2406(5) 0.1988(4) 0.0188(15) Uani 1 1 d . . . . .
H6A H 0.8433 0.3010 0.1872 0.023 Uiso 1 1 calc R U . . .
H6B H 0.8081 0.2009 0.1844 0.023 Uiso 1 1 calc R U . . .
C7 C 0.8854(8) 0.2321(7) 0.2799(5) 0.026(2) Uani 1 1 d . . . . .
H7A H 0.9046 0.1713 0.2914 0.031 Uiso 1 1 calc R U . . .
H7B H 0.8222 0.2466 0.3076 0.031 Uiso 1 1 calc R U . . .
C8 C 0.9730(7) 0.2936(6) 0.3030(5) 0.0251(18) Uani 1 1 d . . . . .
H8A H 0.9511 0.3546 0.2955 0.030 Uiso 1 1 calc R U . . .
H8B H 0.9875 0.2855 0.3558 0.030 Uiso 1 1 calc R U . . .
C9 C 1.0715(7) 0.2761(6) 0.2589(4) 0.0220(17) Uani 1 1 d . . . . .
H9A H 1.0987 0.2177 0.2713 0.026 Uiso 1 1 calc R U . . .
H9B H 1.1245 0.3198 0.2718 0.026 Uiso 1 1 calc R U . . .
C10 C 1.0489(7) 0.2808(5) 0.1763(4) 0.0163(14) Uani 1 1 d . . . . .
H10A H 1.0285 0.3409 0.1630 0.020 Uiso 1 1 calc R U . . .
H10B H 1.1119 0.2658 0.1484 0.020 Uiso 1 1 calc R U . . .
C11 C 0.9330(8) 0.2054(8) -0.1463(7) 0.017(2) Uani 1 1 d . . . . .
H11 H 0.9720 0.1523 -0.1617 0.021 Uiso 1 1 calc R U . . .
C12 C 0.8241(7) 0.1969(7) -0.1757(5) 0.0270(19) Uani 1 1 d . . . . .
H12A H 0.7830 0.2483 -0.1611 0.032 Uiso 1 1 calc R U . . .
H12B H 0.7911 0.1444 -0.1548 0.032 Uiso 1 1 calc R U . . .
C13 C 0.8271(8) 0.1899(7) -0.2586(5) 0.034(2) Uani 1 1 d . . . . .
H13A H 0.7560 0.1858 -0.2778 0.040 Uiso 1 1 calc R U . . .
H13B H 0.8644 0.1363 -0.2729 0.040 Uiso 1 1 calc R U . . .
C14 C 0.8808(10) 0.2693(7) -0.2924(5) 0.040(3) Uani 1 1 d . . . . .
H14A H 0.8846 0.2620 -0.3462 0.048 Uiso 1 1 calc R U . . .
H14B H 0.8400 0.3223 -0.2820 0.048 Uiso 1 1 calc R U . . .
C15 C 0.9895(11) 0.2803(6) -0.2616(5) 0.041(3) Uani 1 1 d . . . . .
H15A H 1.0203 0.3343 -0.2815 0.050 Uiso 1 1 calc R U . . .
H15B H 1.0328 0.2307 -0.2775 0.050 Uiso 1 1 calc R U . . .
C16 C 0.9892(9) 0.2847(6) -0.1778(5) 0.0269(19) Uani 1 1 d . . . . .
H16A H 1.0609 0.2860 -0.1594 0.032 Uiso 1 1 calc R U . . .
H16B H 0.9543 0.3387 -0.1616 0.032 Uiso 1 1 calc R U . . .
P20 P 0.96838(12) 0.01288(10) 0.0043(3) 0.0145(3) Uani 1 1 d . . . . .
C21 C 0.8822(12) -0.0096(8) -0.0725(8) 0.022(3) Uani 1 1 d . . . . .
C22 C 0.7765(7) -0.0228(6) -0.0653(5) 0.0286(19) Uani 1 1 d . . . . .
H22 H 0.7444 -0.0190 -0.0187 0.034 Uiso 1 1 calc R U . . .
C23 C 0.7184(8) -0.0417(7) -0.1280(6) 0.039(2) Uani 1 1 d . . . . .
H23 H 0.6462 -0.0507 -0.1238 0.046 Uiso 1 1 calc R U . . .
C24 C 0.7649(8) -0.0474(7) -0.1953(6) 0.034(2) Uani 1 1 d . . . . .
H24 H 0.7248 -0.0582 -0.2378 0.041 Uiso 1 1 calc R U . . .
C25 C 0.8687(13) -0.0374(9) -0.2008(8) 0.030(3) Uani 1 1 d . . . . .
H25 H 0.9009 -0.0439 -0.2472 0.036 Uiso 1 1 calc R U . . .
C26 C 0.9278(10) -0.0181(6) -0.1406(6) 0.021(2) Uani 1 1 d . . . . .
H26 H 1.0001 -0.0107 -0.1456 0.025 Uiso 1 1 calc R U . . .
C31 C 0.8936(11) 0.0004(8) 0.0880(7) 0.017(3) Uani 1 1 d . . . . .
C32 C 0.8029(6) 0.0479(5) 0.0983(5) 0.0218(16) Uani 1 1 d . . . . .
H32 H 0.7786 0.0852 0.0607 0.026 Uiso 1 1 calc R U . . .
C33 C 0.7479(7) 0.0406(5) 0.1638(5) 0.0241(17) Uani 1 1 d . . . . .
H33 H 0.6841 0.0702 0.1696 0.029 Uiso 1 1 calc R U . . .
C34 C 0.7864(8) -0.0099(6) 0.2204(5) 0.0262(19) Uani 1 1 d . . . . .
H34 H 0.7490 -0.0149 0.2649 0.031 Uiso 1 1 calc R U . . .
C35 C 0.8791(12) -0.0532(9) 0.2123(7) 0.025(3) Uani 1 1 d . . . . .
H35 H 0.9069 -0.0852 0.2522 0.030 Uiso 1 1 calc R U . . .
C36 C 0.9320(9) -0.0502(7) 0.1460(6) 0.020(2) Uani 1 1 d . . . . .
H36 H 0.9940 -0.0823 0.1399 0.024 Uiso 1 1 calc R U . . .
C41 C 1.0483(5) -0.0856(4) 0.0039(14) 0.0172(13) Uani 1 1 d . . . . .
C42 C 1.1549(5) -0.0836(4) 0.0006(12) 0.0223(12) Uani 1 1 d . . . . .
H42 H 1.1901 -0.0294 0.0000 0.027 Uiso 1 1 calc R U . . .
C43 C 1.2105(6) -0.1613(5) -0.0016(13) 0.0275(18) Uani 1 1 d . . . . .
H43 H 1.2837 -0.1598 -0.0029 0.033 Uiso 1 1 calc R U . . .
C44 C 1.1599(6) -0.2401(4) -0.0020(12) 0.0273(17) Uani 1 1 d . . . . .
H44 H 1.1980 -0.2930 -0.0036 0.033 Uiso 1 1 calc R U . . .
C45 C 1.0533(6) -0.2420(4) 0.0001(15) 0.0277(15) Uani 1 1 d . . . . .
H45 H 1.0183 -0.2963 0.0006 0.033 Uiso 1 1 calc R U . . .
C46 C 0.9973(5) -0.1658(4) 0.0016(12) 0.0231(13) Uani 1 1 d . . . . .
H46 H 0.9242 -0.1677 0.0010 0.028 Uiso 1 1 calc R U . . .
O50 O 1.084(3) 0.470(2) 0.509(2) 0.036(2) Uani 0.165(12) 1 d D . P A 1
C51 C 1.028(4) 0.490(5) 0.576(2) 0.033(3) Uani 0.165(12) 1 d D . P A 1
H51A H 0.9666 0.4521 0.5784 0.040 Uiso 0.165(12) 1 calc R U P A 1
H51B H 1.0027 0.5512 0.5726 0.040 Uiso 0.165(12) 1 calc R U P A 1
C52 C 1.087(8) 0.481(11) 0.645(3) 0.038(4) Uani 0.165(12) 1 d D . P A 1
H52A H 1.0431 0.4953 0.6868 0.057 Uiso 0.165(12) 1 calc R U P A 1
H52B H 1.1468 0.5199 0.6443 0.057 Uiso 0.165(12) 1 calc R U P A 1
H52C H 1.1112 0.4204 0.6498 0.057 Uiso 0.165(12) 1 calc R U P A 1
C53 C 1.018(4) 0.478(5) 0.448(2) 0.026(2) Uani 0.165(12) 1 d D . P A 1
H53A H 0.9862 0.5367 0.4468 0.031 Uiso 0.165(12) 1 calc R U P A 1
H53B H 0.9620 0.4342 0.4508 0.031 Uiso 0.165(12) 1 calc R U P A 1
C54 C 1.082(6) 0.463(5) 0.379(3) 0.027(3) Uani 0.165(12) 1 d D . P A 1
H54A H 1.0386 0.4711 0.3360 0.040 Uiso 0.165(12) 1 calc R U P A 1
H54B H 1.1101 0.4042 0.3799 0.040 Uiso 0.165(12) 1 calc R U P A 1
H54C H 1.1387 0.5056 0.3782 0.040 Uiso 0.165(12) 1 calc R U P A 1
O50' O 1.0285(6) 0.4459(4) 0.5010(10) 0.036(2) Uani 0.835(12) 1 d D . P A 2
C51' C 0.9938(11) 0.4723(9) 0.5733(7) 0.033(3) Uani 0.835(12) 1 d D . P A 2
H51C H 0.9466 0.4271 0.5925 0.040 Uiso 0.835(12) 1 calc R U P A 2
H51D H 0.9536 0.5268 0.5684 0.040 Uiso 0.835(12) 1 calc R U P A 2
C52' C 1.0773(18) 0.487(2) 0.6283(11) 0.038(4) Uani 0.835(12) 1 d D . P A 2
H52D H 1.0467 0.5036 0.6752 0.057 Uiso 0.835(12) 1 calc R U P A 2
H52E H 1.1230 0.5333 0.6111 0.057 Uiso 0.835(12) 1 calc R U P A 2
H52F H 1.1169 0.4330 0.6345 0.057 Uiso 0.835(12) 1 calc R U P A 2
C53' C 1.0741(8) 0.5158(7) 0.4633(6) 0.026(2) Uani 0.835(12) 1 d D . P A 2
H53C H 1.1359 0.5364 0.4900 0.031 Uiso 0.835(12) 1 calc R U P A 2
H53D H 1.0249 0.5648 0.4594 0.031 Uiso 0.835(12) 1 calc R U P A 2
C54' C 1.1042(14) 0.4840(12) 0.3875(8) 0.027(3) Uani 0.835(12) 1 d D . P A 2
H54D H 1.1377 0.5313 0.3605 0.040 Uiso 0.835(12) 1 calc R U P A 2
H54E H 1.0424 0.4652 0.3610 0.040 Uiso 0.835(12) 1 calc R U P A 2
H54F H 1.1520 0.4349 0.3920 0.040 Uiso 0.835(12) 1 calc R U P A 2
 
loop_
 _atom_site_aniso_label
 _atom_site_aniso_U_11
 _atom_site_aniso_U_22
 _atom_site_aniso_U_33
 _atom_site_aniso_U_23
 _atom_site_aniso_U_13
 _atom_site_aniso_U_12
Re 0.01206(9) 0.00854(9) 0.01316(9) -0.0008(3) 0.0002(3) -0.00037(9)
Cl1 0.0167(6) 0.0105(6) 0.0214(11) -0.0004(12) 0.0002(12) -0.0023(5)
Cl2 0.0159(16) 0.0149(16) 0.0152(13) -0.0034(11) 0.0021(11) 0.0015(12)
Cl3 0.0183(17) 0.0136(15) 0.0193(14) -0.0011(11) -0.0019(12) 0.0005(12)
N1 0.012(4) 0.012(5) 0.010(4) 0.000(3) -0.003(3) -0.002(3)
C2 0.010(5) 0.016(6) 0.036(6) -0.006(5) -0.002(4) 0.001(5)
C3 0.022(7) 0.012(6) 0.019(5) -0.004(4) 0.008(4) 0.002(5)
N4 0.012(4) 0.008(4) 0.020(5) -0.004(3) 0.000(3) -0.003(3)
C5 0.013(5) 0.014(5) 0.017(4) 0.000(3) 0.003(4) -0.001(4)
C6 0.017(4) 0.017(4) 0.023(4) -0.001(3) 0.002(3) 0.001(3)
C7 0.037(5) 0.026(5) 0.014(4) -0.002(4) 0.005(4) -0.003(5)
C8 0.033(5) 0.028(5) 0.015(4) -0.007(3) 0.000(3) 0.001(4)
C9 0.022(4) 0.028(5) 0.017(4) 0.000(3) 0.001(3) -0.001(3)
C10 0.017(4) 0.015(3) 0.017(3) -0.003(3) 0.003(3) -0.002(3)
C11 0.023(6) 0.008(4) 0.020(4) -0.002(3) 0.001(4) 0.001(4)
C12 0.026(5) 0.034(5) 0.022(4) -0.008(4) -0.005(3) 0.003(4)
C13 0.045(6) 0.035(5) 0.022(4) -0.004(4) -0.010(4) 0.010(5)
C14 0.075(9) 0.031(6) 0.014(4) 0.005(4) -0.008(5) 0.016(6)
C15 0.090(10) 0.017(5) 0.018(5) 0.007(4) 0.015(5) -0.001(5)
C16 0.039(5) 0.018(4) 0.023(4) 0.001(3) 0.000(4) -0.007(4)
P20 0.0171(7) 0.0103(6) 0.0160(8) -0.0002(17) -0.0025(17) -0.0012(5)
C21 0.029(7) 0.008(5) 0.028(6) -0.003(4) -0.008(5) 0.000(4)
C22 0.028(5) 0.027(5) 0.031(5) -0.005(4) -0.011(4) -0.003(4)
C23 0.030(5) 0.034(5) 0.052(6) -0.013(5) -0.014(5) -0.010(4)
C24 0.037(6) 0.029(5) 0.035(6) -0.009(4) -0.021(5) -0.005(5)
C25 0.049(8) 0.020(5) 0.020(6) -0.005(4) -0.004(5) 0.003(5)
C26 0.030(5) 0.010(5) 0.022(4) 0.000(4) -0.006(4) -0.001(4)
C31 0.014(5) 0.015(5) 0.021(5) 0.003(4) 0.005(4) -0.008(4)
C32 0.022(4) 0.016(4) 0.028(4) 0.004(3) -0.001(3) -0.004(3)
C33 0.019(4) 0.021(4) 0.032(4) -0.002(3) 0.006(3) 0.002(3)
C34 0.033(5) 0.024(5) 0.022(4) 0.001(4) 0.007(4) -0.005(4)
C35 0.031(6) 0.031(7) 0.013(5) 0.009(4) 0.001(4) 0.004(5)
C36 0.020(5) 0.021(5) 0.020(4) 0.000(4) 0.000(3) 0.005(4)
C41 0.024(3) 0.012(2) 0.015(3) -0.003(7) 0.001(7) 0.004(2)
C42 0.029(3) 0.014(3) 0.024(3) -0.001(9) -0.002(10) 0.004(2)
C43 0.030(3) 0.022(3) 0.030(5) -0.011(7) 0.005(8) 0.007(3)
C44 0.043(4) 0.015(3) 0.023(4) -0.003(7) -0.001(8) 0.012(3)
C45 0.046(4) 0.010(3) 0.027(3) -0.006(9) -0.004(9) 0.000(3)
C46 0.029(3) 0.015(3) 0.025(3) -0.012(7) -0.003(11) -0.001(3)
O50 0.046(5) 0.018(3) 0.043(4) 0.005(7) 0.032(7) -0.007(3)
C51 0.033(7) 0.027(7) 0.040(6) -0.006(5) 0.010(5) -0.013(6)
C52 0.046(10) 0.017(7) 0.052(11) 0.008(9) -0.005(8) -0.003(7)
C53 0.025(5) 0.019(5) 0.033(6) -0.004(4) 0.008(4) 0.000(4)
C54 0.028(8) 0.024(8) 0.027(6) -0.008(5) 0.000(5) -0.005(5)
O50' 0.046(5) 0.018(3) 0.043(4) 0.005(7) 0.032(7) -0.007(3)
C51' 0.033(7) 0.027(7) 0.040(6) -0.006(5) 0.010(5) -0.013(6)
C52' 0.046(10) 0.017(7) 0.052(11) 0.008(9) -0.005(8) -0.003(7)
C53' 0.025(5) 0.019(5) 0.033(6) -0.004(4) 0.008(4) 0.000(4)
C54' 0.028(8) 0.024(8) 0.027(6) -0.008(5) 0.000(5) -0.005(5)
 
_geom_special_details
;
 All esds (except the esd in the dihedral angle between two l.s. planes)
 are estimated using the full covariance matrix.  The cell esds are taken
 into account individually in the estimation of esds in distances, angles
 and torsion angles; correlations between esds in cell parameters are only
 used when they are defined by crystal symmetry.  An approximate (isotropic)
 treatment of cell esds is used for estimating esds involving l.s. planes.
;
 
loop_
 _geom_bond_atom_site_label_1
 _geom_bond_atom_site_label_2
 _geom_bond_distance
 _geom_bond_site_symmetry_2
 _geom_bond_publ_flag
Re N4 2.045(11) . ?
Re N1 2.052(11) . ?
Re Cl3 2.377(4) . ?
Re Cl2 2.381(3) . ?
Re Cl1 2.4103(15) . ?
Re P20 2.4473(15) . ?
N1 C2 1.318(18) . ?
N1 C11 1.493(17) . ?
C2 C3 1.394(11) . ?
C3 N4 1.317(18) . ?
N4 C5 1.498(17) . ?
C5 C10 1.527(12) . ?
C5 C6 1.530(13) . ?
C6 C7 1.512(11) . ?
C7 C8 1.536(13) . ?
C8 C9 1.535(12) . ?
C9 C10 1.538(11) . ?
C11 C12 1.517(14) . ?
C11 C16 1.532(14) . ?
C12 C13 1.519(12) . ?
C13 C14 1.534(15) . ?
C14 C15 1.528(18) . ?
C15 C16 1.532(13) . ?
P20 C31 1.821(14) . ?
P20 C21 1.826(15) . ?
P20 C41 1.834(6) . ?
C21 C26 1.383(18) . ?
C21 C22 1.393(17) . ?
C22 C23 1.401(12) . ?
C23 C24 1.373(15) . ?
C24 C25 1.359(19) . ?
C25 C26 1.374(19) . ?
C31 C32 1.397(16) . ?
C31 C36 1.405(17) . ?
C32 C33 1.398(11) . ?
C33 C34 1.386(13) . ?
C34 C35 1.382(17) . ?
C35 C36 1.394(18) . ?
C41 C42 1.385(9) . ?
C41 C46 1.399(8) . ?
C42 C43 1.396(9) . ?
C43 C44 1.377(10) . ?
C44 C45 1.385(11) . ?
C45 C46 1.378(9) . ?
O50 C53 1.410(19) . ?
O50 C51 1.46(2) . ?
C51 C52 1.49(3) . ?
C53 C54 1.52(2) . ?
O50' C53' 1.406(13) . ?
O50' C51' 1.454(19) . ?
C51' C52' 1.49(2) . ?
C53' C54' 1.520(18) . ?
 
loop_
 _geom_angle_atom_site_label_1
 _geom_angle_atom_site_label_2
 _geom_angle_atom_site_label_3
 _geom_angle
 _geom_angle_site_symmetry_1
 _geom_angle_site_symmetry_3
 _geom_angle_publ_flag
N4 Re N1 77.0(2) . . ?
N4 Re Cl3 93.3(3) . . ?
N1 Re Cl3 170.2(3) . . ?
N4 Re Cl2 170.6(4) . . ?
N1 Re Cl2 95.1(3) . . ?
Cl3 Re Cl2 94.72(6) . . ?
N4 Re Cl1 85.9(3) . . ?
N1 Re Cl1 87.6(3) . . ?
Cl3 Re Cl1 92.63(11) . . ?
Cl2 Re Cl1 88.82(11) . . ?
N4 Re P20 97.0(3) . . ?
N1 Re P20 94.1(3) . . ?
Cl3 Re P20 86.09(12) . . ?
Cl2 Re P20 88.45(13) . . ?
Cl1 Re P20 176.89(8) . . ?
C2 N1 C11 117.3(11) . . ?
C2 N1 Re 115.9(9) . . ?
C11 N1 Re 126.3(8) . . ?
N1 C2 C3 114.2(17) . . ?
N4 C3 C2 117.9(16) . . ?
C3 N4 C5 119.1(11) . . ?
C3 N4 Re 114.3(9) . . ?
C5 N4 Re 126.2(8) . . ?
N4 C5 C10 109.4(9) . . ?
N4 C5 C6 115.1(8) . . ?
C10 C5 C6 109.9(8) . . ?
C7 C6 C5 109.4(8) . . ?
C6 C7 C8 110.4(7) . . ?
C9 C8 C7 111.4(8) . . ?
C8 C9 C10 110.4(7) . . ?
C5 C10 C9 110.4(7) . . ?
N1 C11 C12 112.6(8) . . ?
N1 C11 C16 108.9(9) . . ?
C12 C11 C16 112.3(10) . . ?
C11 C12 C13 109.5(8) . . ?
C12 C13 C14 110.9(8) . . ?
C15 C14 C13 111.0(8) . . ?
C14 C15 C16 111.8(9) . . ?
C11 C16 C15 109.9(8) . . ?
C31 P20 C21 107.4(4) . . ?
C31 P20 C41 102.6(8) . . ?
C21 P20 C41 100.8(8) . . ?
C31 P20 Re 109.7(4) . . ?
C21 P20 Re 114.5(5) . . ?
C41 P20 Re 120.6(2) . . ?
C26 C21 C22 119.5(12) . . ?
C26 C21 P20 116.5(11) . . ?
C22 C21 P20 123.9(10) . . ?
C21 C22 C23 118.9(10) . . ?
C24 C23 C22 120.5(9) . . ?
C25 C24 C23 119.7(10) . . ?
C24 C25 C26 121.2(13) . . ?
C25 C26 C21 120.1(13) . . ?
C32 C31 C36 119.0(11) . . ?
C32 C31 P20 120.5(9) . . ?
C36 C31 P20 120.1(10) . . ?
C31 C32 C33 120.3(9) . . ?
C34 C33 C32 119.9(8) . . ?
C35 C34 C33 120.3(9) . . ?
C34 C35 C36 120.4(11) . . ?
C35 C36 C31 120.0(11) . . ?
C42 C41 C46 119.4(6) . . ?
C42 C41 P20 123.2(5) . . ?
C46 C41 P20 117.3(5) . . ?
C41 C42 C43 120.0(6) . . ?
C44 C43 C42 120.3(7) . . ?
C43 C44 C45 119.6(6) . . ?
C46 C45 C44 120.7(6) . . ?
C45 C46 C41 119.9(6) . . ?
C53 O50 C51 110(2) . . ?
O50 C51 C52 116(2) . . ?
O50 C53 C54 108(2) . . ?
C53' O50' C51' 111.3(8) . . ?
O50' C51' C52' 115.2(12) . . ?
O50' C53' C54' 108.0(11) . . ?
 
_refine_diff_density_max    4.582
_refine_diff_density_min   -1.337
_refine_diff_density_rms    0.152

_vrf_PLAT971_9094
;
PROBLEM: Check Calcd Residual Density  0.92A From      Re       4.83 eA-3  
RESPONSE: Four difference peaks between 4.83 and 1.89 eA-3 are found in close 
vicinity of the rhenium center (0.84-0.93 A). This is probably due to the 
twinning (inversion twin) and an imperfect absorption correction.
;
_vrf_PLAT411_9094
;
PROBLEM: Short Inter H...H Contact  H23    ..  H53B    ..       1.97 Ang.  
RESPONSE: Diethylether molecule is disordered and was split on two positions, 
the complex was not split though it is also slightly disordered. 
H53B is a hydrogen atom of the minor component of the ether molecule 
(occupation factor of 0.165). Distance would probably normalize if disorder 
of the Re complex could be modelled.
;

_shelx_res_file
;
TITL [LRe(PPh3)(Cl)3] * Et2O
TITL 9094 Mei Wang in Pna2(1) : WGT-WM-088-01
CELL 0.71073  12.9789  15.359  18.263  90.000  90.000  90.000
ZERR    4.00   0.0014   0.002   0.002   0.000   0.000   0.000
LATT -1
SYMM -X, -Y, 0.5+Z
SYMM 0.5+X, 0.5-Y, Z
SYMM 0.5-X, 0.5+Y, 0.5+Z
SFAC C H N O P RE CL
UNIT 144 196 8 4 4 4 12
OMIT -3 70

TEMP -173

OMIT 0 0 -2
OMIT 0 0 2
OMIT 0 1 -1
OMIT 0 1 1
OMIT 1 1 0
OMIT 1 1 -1
OMIT 1 1 1

L.S. 8

SIZE 0.07 0.05 0.02

ACTA

BOND
FMAP 2
PLAN 50

EADP O50 O50'
EADP C51 C51'
EADP C52 C52'
EADP C53 C53'
EADP C54 C54'

TWIN

WGHT    0.037200    5.481800
BASF   0.31206
FVAR       0.07360   0.16512
RE    6    1.047866    0.157334    0.001574    11.00000    0.01206    0.00854 =
         0.01316   -0.00078    0.00015   -0.00037
CL1   7    1.134601    0.295966   -0.003496    11.00000    0.01666    0.01046 =
         0.02141   -0.00039    0.00016   -0.00232
CL2   7    1.153977    0.108457   -0.096519    11.00000    0.01589    0.01488 =
         0.01519   -0.00337    0.00207    0.00152
CL3   7    1.158900    0.104526    0.095067    11.00000    0.01835    0.01358 =
         0.01932   -0.00111   -0.00189    0.00052
N1    3    0.936403    0.209968   -0.064720    11.00000    0.01185    0.01210 =
         0.01015   -0.00031   -0.00299   -0.00235
C2    1    0.869112    0.261235   -0.032183    11.00000    0.00959    0.01552 =
         0.03580   -0.00568   -0.00229    0.00141
AFIX  43
H2    2    0.820167    0.295090   -0.058362    11.00000   -1.20000
AFIX   0
C3    1    0.875966    0.261490    0.043966    11.00000    0.02244    0.01207 =
         0.01900   -0.00420    0.00750    0.00193
AFIX  43
H3    2    0.828619    0.293708    0.072941    11.00000   -1.20000
AFIX   0
N4    3    0.950178    0.215640    0.074470    11.00000    0.01208    0.00782 =
         0.02009   -0.00378   -0.00027   -0.00323
C5    1    0.962420    0.217825    0.156032    11.00000    0.01333    0.01445 =
         0.01660    0.00014    0.00281   -0.00098
AFIX  13
H5    2    0.984455    0.158363    0.171914    11.00000   -1.20000
AFIX   0
C6    1    0.864661    0.240618    0.198751    11.00000    0.01708    0.01685 =
         0.02260   -0.00122    0.00152    0.00110
AFIX  23
H6A   2    0.843260    0.300956    0.187248    11.00000   -1.20000
H6B   2    0.808113    0.200869    0.184395    11.00000   -1.20000
AFIX   0
C7    1    0.885419    0.232144    0.279877    11.00000    0.03726    0.02601 =
         0.01365   -0.00209    0.00524   -0.00285
AFIX  23
H7A   2    0.904606    0.171289    0.291428    11.00000   -1.20000
H7B   2    0.822174    0.246582    0.307643    11.00000   -1.20000
AFIX   0
C8    1    0.972987    0.293557    0.303015    11.00000    0.03302    0.02756 =
         0.01473   -0.00748    0.00019    0.00073
AFIX  23
H8A   2    0.951098    0.354650    0.295477    11.00000   -1.20000
H8B   2    0.987480    0.285474    0.355799    11.00000   -1.20000
AFIX   0
C9    1    1.071499    0.276105    0.258852    11.00000    0.02157    0.02794 =
         0.01651    0.00016    0.00055   -0.00063
AFIX  23
H9A   2    1.098727    0.217729    0.271258    11.00000   -1.20000
H9B   2    1.124535    0.319796    0.271805    11.00000   -1.20000
AFIX   0
C10   1    1.048868    0.280816    0.176291    11.00000    0.01688    0.01481 =
         0.01714   -0.00293    0.00280   -0.00155
AFIX  23
H10A  2    1.028516    0.340895    0.163005    11.00000   -1.20000
H10B  2    1.111861    0.265841    0.148438    11.00000   -1.20000
AFIX   0
C11   1    0.932975    0.205412   -0.146338    11.00000    0.02270    0.00845 =
         0.02040   -0.00163    0.00083    0.00060
AFIX  13
H11   2    0.972000    0.152311   -0.161657    11.00000   -1.20000
AFIX   0
C12   1    0.824130    0.196872   -0.175671    11.00000    0.02574    0.03377 =
         0.02153   -0.00815   -0.00540    0.00277
AFIX  23
H12A  2    0.783004    0.248312   -0.161084    11.00000   -1.20000
H12B  2    0.791066    0.144360   -0.154787    11.00000   -1.20000
AFIX   0
C13   1    0.827137    0.189932   -0.258637    11.00000    0.04462    0.03481 =
         0.02160   -0.00436   -0.01020    0.00955
AFIX  23
H13A  2    0.755953    0.185774   -0.277797    11.00000   -1.20000
H13B  2    0.864434    0.136320   -0.272886    11.00000   -1.20000
AFIX   0
C14   1    0.880828    0.269288   -0.292440    11.00000    0.07533    0.03051 =
         0.01352    0.00536   -0.00816    0.01558
AFIX  23
H14A  2    0.884604    0.262048   -0.346238    11.00000   -1.20000
H14B  2    0.839967    0.322289   -0.282024    11.00000   -1.20000
AFIX   0
C15   1    0.989491    0.280278   -0.261584    11.00000    0.08978    0.01693 =
         0.01754    0.00688    0.01494   -0.00077
AFIX  23
H15A  2    1.020277    0.334313   -0.281451    11.00000   -1.20000
H15B  2    1.032755    0.230700   -0.277544    11.00000   -1.20000
AFIX   0
C16   1    0.989167    0.284717   -0.177806    11.00000    0.03911    0.01843 =
         0.02324    0.00148    0.00038   -0.00690
AFIX  23
H16A  2    1.060917    0.286009   -0.159441    11.00000   -1.20000
H16B  2    0.954309    0.338725   -0.161625    11.00000   -1.20000
AFIX   0
P20   5    0.968381    0.012877    0.004251    11.00000    0.01712    0.01027 =
         0.01600   -0.00022   -0.00248   -0.00121
C21   1    0.882217   -0.009599   -0.072513    11.00000    0.02854    0.00821 =
         0.02791   -0.00254   -0.00773    0.00017
C22   1    0.776528   -0.022784   -0.065319    11.00000    0.02774    0.02744 =
         0.03069   -0.00477   -0.01075   -0.00268
AFIX  43
H22   2    0.744380   -0.018997   -0.018696    11.00000   -1.20000
AFIX   0
C23   1    0.718398   -0.041728   -0.127980    11.00000    0.03001    0.03390 =
         0.05178   -0.01297   -0.01377   -0.00970
AFIX  43
H23   2    0.646215   -0.050722   -0.123833    11.00000   -1.20000
AFIX   0
C24   1    0.764925   -0.047392   -0.195299    11.00000    0.03742    0.02890 =
         0.03505   -0.00867   -0.02132   -0.00542
AFIX  43
H24   2    0.724789   -0.058229   -0.237834    11.00000   -1.20000
AFIX   0
C25   1    0.868668   -0.037427   -0.200827    11.00000    0.04882    0.01983 =
         0.02018   -0.00515   -0.00382    0.00273
AFIX  43
H25   2    0.900898   -0.043911   -0.247211    11.00000   -1.20000
AFIX   0
C26   1    0.927829   -0.018140   -0.140556    11.00000    0.03028    0.01039 =
         0.02222    0.00025   -0.00640   -0.00063
AFIX  43
H26   2    1.000135   -0.010669   -0.145650    11.00000   -1.20000
AFIX   0
C31   1    0.893631    0.000433    0.087974    11.00000    0.01430    0.01450 =
         0.02104    0.00323    0.00451   -0.00784
C32   1    0.802944    0.047859    0.098330    11.00000    0.02158    0.01585 =
         0.02784    0.00391   -0.00102   -0.00427
AFIX  43
H32   2    0.778582    0.085234    0.060672    11.00000   -1.20000
AFIX   0
C33   1    0.747850    0.040593    0.163847    11.00000    0.01930    0.02116 =
         0.03177   -0.00151    0.00589    0.00200
AFIX  43
H33   2    0.684110    0.070232    0.169563    11.00000   -1.20000
AFIX   0
C34   1    0.786434   -0.009938    0.220424    11.00000    0.03310    0.02393 =
         0.02162    0.00102    0.00701   -0.00544
AFIX  43
H34   2    0.749032   -0.014852    0.264946    11.00000   -1.20000
AFIX   0
C35   1    0.879097   -0.053208    0.212337    11.00000    0.03116    0.03147 =
         0.01316    0.00926    0.00149    0.00431
AFIX  43
H35   2    0.906891   -0.085197    0.252236    11.00000   -1.20000
AFIX   0
C36   1    0.932009   -0.050179    0.145966    11.00000    0.02013    0.02103 =
         0.01993    0.00009   -0.00001    0.00501
AFIX  43
H36   2    0.993975   -0.082313    0.139947    11.00000   -1.20000
AFIX   0
C41   1    1.048308   -0.085586    0.003850    11.00000    0.02447    0.01237 =
         0.01469   -0.00311    0.00074    0.00409
C42   1    1.154865   -0.083631    0.000648    11.00000    0.02889    0.01370 =
         0.02417   -0.00106   -0.00159    0.00383
AFIX  43
H42   2    1.190078   -0.029412   -0.000003    11.00000   -1.20000
AFIX   0
C43   1    1.210531   -0.161321   -0.001622    11.00000    0.03030    0.02228 =
         0.02992   -0.01122    0.00526    0.00668
AFIX  43
H43   2    1.283682   -0.159836   -0.002943    11.00000   -1.20000
AFIX   0
C44   1    1.159921   -0.240141   -0.001958    11.00000    0.04350    0.01499 =
         0.02327   -0.00275   -0.00058    0.01186
AFIX  43
H44   2    1.197951   -0.292953   -0.003613    11.00000   -1.20000
AFIX   0
C45   1    1.053251   -0.241969    0.000131    11.00000    0.04585    0.01049 =
         0.02679   -0.00583   -0.00408   -0.00014
AFIX  43
H45   2    1.018322   -0.296322    0.000588    11.00000   -1.20000
AFIX   0
C46   1    0.997312   -0.165757    0.001551    11.00000    0.02901    0.01530 =
         0.02508   -0.01235   -0.00290   -0.00139
AFIX  43
H46   2    0.924155   -0.167658    0.000970    11.00000   -1.20000
AFIX   0

PART 1
O50   4    1.083818    0.470294    0.508863    21.00000    0.04589    0.01835 =
         0.04341    0.00526    0.03211   -0.00731
C51   1    1.027799    0.490412    0.575814    21.00000    0.03285    0.02713 =
         0.03980   -0.00636    0.00965   -0.01339
AFIX  23
H51A  2    0.966595    0.452070    0.578432    21.00000   -1.20000
H51B  2    1.002718    0.551168    0.572637    21.00000   -1.20000
AFIX   0
C52   1    1.087316    0.480649    0.645112    21.00000    0.04595    0.01657 =
         0.05171    0.00789   -0.00460   -0.00347
AFIX  33
H52A  2    1.043074    0.495270    0.686821    21.00000   -1.50000
H52B  2    1.146845    0.519888    0.644262    21.00000   -1.50000
H52C  2    1.111167    0.420369    0.649822    21.00000   -1.50000
AFIX   0
C53   1    1.017811    0.478060    0.447924    21.00000    0.02512    0.01858 =
         0.03336   -0.00374    0.00773   -0.00040
AFIX  23
H53A  2    0.986225    0.536716    0.446822    21.00000   -1.20000
H53B  2    0.962015    0.434244    0.450830    21.00000   -1.20000
AFIX   0
C54   1    1.082011    0.463439    0.379418    21.00000    0.02835    0.02398 =
         0.02720   -0.00769   -0.00018   -0.00470
AFIX  33
H54A  2    1.038599    0.471087    0.335987    21.00000   -1.50000
H54B  2    1.110145    0.404231    0.379942    21.00000   -1.50000
H54C  2    1.138686    0.505574    0.378154    21.00000   -1.50000
AFIX   0

PART 2
SAME 0.01 O50 > C54
O50'  4    1.028518    0.445924    0.500995   -21.00000    0.04589    0.01835 =
         0.04341    0.00526    0.03211   -0.00731
C51'  1    0.993753    0.472332    0.573348   -21.00000    0.03285    0.02713 =
         0.03980   -0.00636    0.00965   -0.01339
AFIX  23
H51C  2    0.946576    0.427075    0.592473   -21.00000   -1.20000
H51D  2    0.953641    0.526845    0.568433   -21.00000   -1.20000
AFIX   0
C52'  1    1.077293    0.486815    0.628256   -21.00000    0.04595    0.01657 =
         0.05171    0.00789   -0.00460   -0.00347
AFIX  33
H52D  2    1.046733    0.503636    0.675241   -21.00000   -1.50000
H52E  2    1.123028    0.533297    0.611082   -21.00000   -1.50000
H52F  2    1.116934    0.433014    0.634472   -21.00000   -1.50000
AFIX   0
C53'  1    1.074147    0.515817    0.463323   -21.00000    0.02512    0.01858 =
         0.03336   -0.00374    0.00773   -0.00040
AFIX  23
H53C  2    1.135890    0.536410    0.490030   -21.00000   -1.20000
H53D  2    1.024869    0.564792    0.459359   -21.00000   -1.20000
AFIX   0
C54'  1    1.104237    0.483973    0.387475   -21.00000    0.02835    0.02398 =
         0.02720   -0.00769   -0.00018   -0.00470
AFIX  33
H54D  2    1.137685    0.531329    0.360487   -21.00000   -1.50000
H54E  2    1.042404    0.465196    0.361034   -21.00000   -1.50000
H54F  2    1.152022    0.434864    0.392004   -21.00000   -1.50000

AFIX   0
HKLF 4

REM  9094 Mei Wang in Pna2(1) : WGT-WM-088-01
REM R1 =  0.0365 for    8739 Fo > 4sig(Fo)  and  0.0601 for all   11239 data
REM    414 parameters refined using      8 restraints

END

WGHT      0.0374      5.3704

REM Highest difference peak  4.582,  deepest hole -1.337,  1-sigma level  0.152
Q1    1   1.0437  0.1592 -0.0444  11.00000  0.05    4.58
Q2    1   1.0463  0.1593  0.0475  11.00000  0.05    4.38
Q3    1   0.9816  0.1567  0.0015  11.00000  0.05    2.09
Q4    1   1.1192  0.1573  0.0016  11.00000  0.05    1.89
Q5    1   1.1579  0.1044  0.0500  11.00000  0.05    0.96
Q6    1   1.1365  0.2974  0.0418  11.00000  0.05    0.88
Q7    1   0.9651  0.0120  0.0502  11.00000  0.05    0.86
Q8    1   1.1531  0.1082 -0.0510  11.00000  0.05    0.85
Q9    1   0.9607  0.0132 -0.0430  11.00000  0.05    0.78
Q10   1   0.9839  0.1889  0.0381  11.00000  0.05    0.77
Q11   1   1.1557  0.1057 -0.1392  11.00000  0.05    0.76
Q12   1   1.1619  0.1025  0.1392  11.00000  0.05    0.74
Q13   1   1.1342  0.2975 -0.0443  11.00000  0.05    0.71
Q14   1   0.9741  0.1840 -0.0412  11.00000  0.05    0.70
Q15   1   1.0811  0.1093 -0.0483  11.00000  0.05    0.66
Q16   1   1.1992  0.1505  0.0019  11.00000  0.05    0.65
Q17   1   0.9950  0.2098 -0.0340  11.00000  0.05    0.65
Q18   1   1.2177  0.2924  0.0013  11.00000  0.05    0.65
Q19   1   1.1037  0.4942  0.5007  11.00000  0.05    0.64
Q20   1   1.1780 -0.1983  0.0005  11.00000  0.05    0.62
Q21   1   1.0820  0.1093  0.0502  11.00000  0.05    0.62
Q22   1   1.0984 -0.0839  0.0037  11.00000  0.05    0.62
Q23   1   1.0426  0.2828  0.2204  11.00000  0.05    0.61
Q24   1   1.0642  0.3096  0.0010  11.00000  0.05    0.60
Q25   1   0.9304  0.2101 -0.1087  11.00000  0.05    0.58
Q26   1   0.9997  0.1054 -0.0348  11.00000  0.05    0.56
Q27   1   1.0382  0.0063  0.0022  11.00000  0.05    0.55
Q28   1   1.1193  0.1635 -0.0616  11.00000  0.05    0.54
Q29   1   0.9256  0.1654  0.0009  11.00000  0.05    0.54
Q30   1   1.2440 -0.1609  0.0001  11.00000  0.05    0.53
Q31   1   1.0017  0.1112  0.0377  11.00000  0.05    0.52
Q32   1   0.9053 -0.0368  0.1092  11.00000  0.05    0.51
Q33   1   1.0800  0.5087  0.7494  11.00000  0.05    0.50
Q34   1   0.9787  0.1356  0.0455  11.00000  0.05    0.49
Q35   1   0.9051 -0.0337 -0.1070  11.00000  0.05    0.49
Q36   1   1.2229  0.5157  0.5889  11.00000  0.05    0.49
Q37   1   1.1011  0.4723  0.3072  11.00000  0.05    0.49
Q38   1   0.8066  0.1854 -0.0296  11.00000  0.05    0.49
Q39   1   1.0803  0.5073  0.2437  11.00000  0.05    0.49
Q40   1   0.8659  0.1934 -0.1481  11.00000  0.05    0.49
Q41   1   0.9054  0.4533  0.5297  11.00000  0.05    0.48
Q42   1   1.0352  0.1116 -0.0839  11.00000  0.05    0.47
Q43   1   0.7767 -0.0132 -0.0244  11.00000  0.05    0.47
Q44   1   1.0400  0.1182  0.0878  11.00000  0.05    0.47
Q45   1   1.0194  0.3136 -0.1522  11.00000  0.05    0.47
Q46   1   1.2033 -0.0488 -0.0489  11.00000  0.05    0.47
Q47   1   0.8208 -0.2091  0.0022  11.00000  0.05    0.46
Q48   1   0.7642  0.3635 -0.0070  11.00000  0.05    0.46
Q49   1   1.0961  0.2008  0.0397  11.00000  0.05    0.46
Q50   1   0.8669  0.2267  0.2376  11.00000  0.05    0.46
;
_shelx_res_checksum   33243

#===END

 
data_2
 
_audit_creation_method            SHELXL-2013
_audit_creation_date              2014-04-29
_audit_block_code                 WGT-WM-071-01
_chemical_name_systematic
;
 ?
;
_chemical_name_common             ?
_chemical_melting_point           ?
_chemical_formula_moiety           
 'C51 H41 Cl N3 P2 Re, Cl, 4(C H4 O)' 
_chemical_formula_sum
 'C55 H57 Cl2 N3 O4 P2 Re' 
_chemical_formula_weight          1143.07

loop_
 _atom_type_symbol
 _atom_type_description
 _atom_type_scat_dispersion_real
 _atom_type_scat_dispersion_imag
 _atom_type_scat_source
 'C'  'C'   0.0033   0.0016
 'International Tables Vol C Tables 4.2.6.8 and 6.1.1.4'
 'H'  'H'   0.0000   0.0000
 'International Tables Vol C Tables 4.2.6.8 and 6.1.1.4'
 'N'  'N'   0.0061   0.0033
 'International Tables Vol C Tables 4.2.6.8 and 6.1.1.4'
 'P'  'P'   0.1023   0.0942
 'International Tables Vol C Tables 4.2.6.8 and 6.1.1.4'
 'Cl'  'Cl'   0.1484   0.1585
 'International Tables Vol C Tables 4.2.6.8 and 6.1.1.4'
 'Re'  'Re'  -1.0185   7.2310
 'International Tables Vol C Tables 4.2.6.8 and 6.1.1.4'
 'O'  'O'   0.0106   0.0060
 'International Tables Vol C Tables 4.2.6.8 and 6.1.1.4'
 
_space_group_crystal_system       orthorhombic
_space_group_IT_number            61
_space_group_name_H-M_alt         'P b c a'
_space_group_name_Hall            '-P 2ac 2ab'
 
_shelx_space_group_comment
;
The symmetry employed for this shelxl refinement is uniquely defined
by the following loop, which should always be used as a source of
symmetry information in preference to the above space-group names.
They are only intended as comments.
;
 
loop_
 _space_group_symop_operation_xyz
 'x, y, z'
 '-x+1/2, -y, z+1/2'
 '-x, y+1/2, -z+1/2'
 'x+1/2, -y+1/2, -z'
 '-x, -y, -z'
 'x-1/2, y, -z-1/2'
 'x, -y-1/2, z-1/2'
 '-x-1/2, y-1/2, z'
 
_cell_length_a                    17.640(2)
_cell_length_b                    22.476(2)
_cell_length_c                    25.573(3)
_cell_angle_alpha                 90
_cell_angle_beta                  90
_cell_angle_gamma                 90
_cell_volume                      10139.1(19)
_cell_formula_units_Z             8
_cell_measurement_temperature     100(2)
_cell_measurement_reflns_used     9661
_cell_measurement_theta_min       2.8043
_cell_measurement_theta_max       30.9258

loop_
 _exptl_crystal_face_index_h
 _exptl_crystal_face_index_k
 _exptl_crystal_face_index_l
 _exptl_crystal_face_perp_dist
    1.00    1.00    2.00    0.0400
   -1.00   -2.00   -2.00    0.0500
    2.00   -2.00    1.00    0.0400
   -1.00    2.00    0.00    0.0400
    0.00   -2.00   -1.00    0.0500
    1.00    2.00   -2.00    0.0200
   -1.00   -2.00    2.00    0.0200
   -2.00    1.00   -1.00    0.0550

_exptl_crystal_description        prism
_exptl_crystal_colour             black
_exptl_crystal_size_max           0.10
_exptl_crystal_size_mid           0.09
_exptl_crystal_size_min           0.04
_exptl_crystal_density_meas       ? 
_exptl_crystal_density_method     ?              
_exptl_crystal_density_diffrn     1.498          
_exptl_crystal_F_000              4632
_exptl_transmission_factor_min    ?                                             
_exptl_transmission_factor_max    ?                                             
_exptl_absorpt_coefficient_mu     2.614
_shelx_estimated_absorpt_T_min    ? 
_shelx_estimated_absorpt_T_max    ? 
_exptl_absorpt_correction_type    gaussian
_exptl_absorpt_process_details    'SADABS (Bruker AXS, 2012)' 
_exptl_absorpt_correction_T_min   0.80415
_exptl_absorpt_correction_T_max   0.90964
 
_exptl_special_details
;
 ?
;
 
_diffrn_ambient_temperature       100(2)
_diffrn_radiation_wavelength      0.71073
_diffrn_radiation_type            MoK\a
_diffrn_source                    '1\mS'
_diffrn_radiation_monochromator   'Incoatec Helios mirrors'
_diffrn_measurement_device_type   'Bruker-AXS Kappa Mach3 APEX-II'
_diffrn_measurement_method        'CCD \f- and \w-scans'
_diffrn_detector_area_resol_mean  66.67
_diffrn_reflns_number             292290
_diffrn_reflns_av_unetI/netI      0.0316
_diffrn_reflns_av_R_equivalents   0.0901
_diffrn_reflns_limit_h_min        -25
_diffrn_reflns_limit_h_max        25
_diffrn_reflns_limit_k_min        -32
_diffrn_reflns_limit_k_max        32
_diffrn_reflns_limit_l_min        -36
_diffrn_reflns_limit_l_max        37
_diffrn_reflns_theta_min          2.605
_diffrn_reflns_theta_max          31.036
_diffrn_reflns_theta_full         25.242
_diffrn_measured_fraction_theta_max   0.998
_diffrn_measured_fraction_theta_full  0.998
_diffrn_reflns_Laue_measured_fraction_max    0.998
_diffrn_reflns_Laue_measured_fraction_full   0.998
_diffrn_reflns_point_group_measured_fraction_max   0.998
_diffrn_reflns_point_group_measured_fraction_full  0.998
_reflns_number_total              16178
_reflns_number_gt                 12368
_reflns_threshold_expression      'I > 2\s(I)'
_reflns_Friedel_coverage          0.000
_reflns_Friedel_fraction_max      .
_reflns_Friedel_fraction_full     .
 
_reflns_special_details
;
 Reflections were merged by SHELXL according to the crystal
 class for the calculation of statistics and refinement.
 
 _reflns_Friedel_fraction is defined as the number of unique
 Friedel pairs measured divided by the number that would be
 possible theoretically, ignoring centric projections and
 systematic absences.
;
 
_computing_data_collection        'APEX2 (Bruker AXS, 2005-2013)'
_computing_cell_refinement        'SAINT software (Bruker AXS, 2004)'
_computing_data_reduction         'SAINT software (Bruker AXS, 2004)'
_computing_structure_solution     'SHELXS (G. M. Sheldrick, 2013)'
_computing_structure_refinement   'SHELXL (G. M. Sheldrick, 2013)'
_computing_molecular_graphics     ?
_computing_publication_material   ?
 
_refine_special_details
;
 ?
;
_refine_ls_structure_factor_coef  Fsqd
_refine_ls_matrix_type            full
_refine_ls_weighting_scheme       calc
_refine_ls_weighting_details
;
 w=1/[\s^2^(Fo^2^)+(0.0119P)^2^+21.7040P]
 where P=(Fo^2^+2Fc^2^)/3
;
_atom_sites_solution_primary      ?
_atom_sites_solution_secondary    ?
_atom_sites_solution_hydrogens    geom
_refine_ls_hydrogen_treatment     constr
_refine_ls_extinction_method      none
_refine_ls_extinction_coef        .
_refine_ls_number_reflns          16178
_refine_ls_number_parameters      612
_refine_ls_number_restraints      0
_refine_ls_R_factor_all           0.0494
_refine_ls_R_factor_gt            0.0280
_refine_ls_wR_factor_ref          0.0598
_refine_ls_wR_factor_gt           0.0523
_refine_ls_goodness_of_fit_ref    1.068
_refine_ls_restrained_S_all       1.068
_refine_ls_shift/su_max           0.006
_refine_ls_shift/su_mean          0.000
 
loop_
 _atom_site_label
 _atom_site_type_symbol
 _atom_site_fract_x
 _atom_site_fract_y
 _atom_site_fract_z
 _atom_site_U_iso_or_equiv
 _atom_site_adp_type
 _atom_site_occupancy
 _atom_site_site_symmetry_order  
 _atom_site_calc_flag
 _atom_site_refinement_flags_posn
 _atom_site_refinement_flags_adp
 _atom_site_refinement_flags_occupancy
 _atom_site_disorder_assembly
 _atom_site_disorder_group
Re Re 0.50804(2) 0.29832(2) 0.67174(2) 0.00935(2) Uani 1 1 d . . . . .
Cl1 Cl 0.63570(3) 0.29613(3) 0.70557(2) 0.01440(10) Uani 1 1 d . . . . .
Cl2 Cl 0.59490(4) 0.38474(3) 0.87129(3) 0.02963(15) Uani 1 1 d . . . . .
N1 N 0.42694(11) 0.33446(8) 0.72423(8) 0.0112(4) Uani 1 1 d . . . . .
C2 C 0.43991(14) 0.35781(10) 0.77256(10) 0.0145(5) Uani 1 1 d . . . . .
H2 H 0.4900 0.3563 0.7862 0.017 Uiso 1 1 calc R U . . .
C3 C 0.38403(15) 0.38354(11) 0.80262(10) 0.0181(5) Uani 1 1 d . . . . .
H3 H 0.3958 0.3995 0.8361 0.022 Uiso 1 1 calc R U . . .
C4 C 0.31025(15) 0.38596(11) 0.78358(11) 0.0196(5) Uani 1 1 d . . . . .
H4 H 0.2710 0.4037 0.8036 0.024 Uiso 1 1 calc R U . . .
C5 C 0.29538(14) 0.36209(11) 0.73519(11) 0.0179(5) Uani 1 1 d . . . . .
H5 H 0.2453 0.3630 0.7215 0.022 Uiso 1 1 calc R U . . .
C6 C 0.35396(13) 0.33647(10) 0.70611(10) 0.0129(4) Uani 1 1 d . . . . .
C7 C 0.34322(13) 0.31158(10) 0.65447(10) 0.0130(5) Uani 1 1 d . . . . .
C8 C 0.27459(14) 0.30663(11) 0.62789(11) 0.0182(5) Uani 1 1 d . . . . .
H8 H 0.2287 0.3188 0.6442 0.022 Uiso 1 1 calc R U . . .
C9 C 0.27364(15) 0.28387(13) 0.57770(11) 0.0232(6) Uani 1 1 d . . . . .
H9 H 0.2271 0.2804 0.5593 0.028 Uiso 1 1 calc R U . . .
C10 C 0.34102(15) 0.26607(12) 0.55423(11) 0.0205(5) Uani 1 1 d . . . . .
H10 H 0.3410 0.2508 0.5196 0.025 Uiso 1 1 calc R U . . .
C11 C 0.40845(14) 0.27082(11) 0.58206(10) 0.0152(5) Uani 1 1 d . . . . .
N12 N 0.40948(11) 0.29333(9) 0.63184(8) 0.0116(4) Uani 1 1 d . . . . .
C13 C 0.48325(14) 0.25372(11) 0.56328(9) 0.0156(5) Uani 1 1 d . . . . .
C14 C 0.49702(16) 0.22946(12) 0.51408(10) 0.0221(5) Uani 1 1 d . . . . .
H14 H 0.4564 0.2242 0.4901 0.027 Uiso 1 1 calc R U . . .
C15 C 0.56975(17) 0.21303(13) 0.50015(11) 0.0249(6) Uani 1 1 d . . . . .
H15 H 0.5796 0.1952 0.4672 0.030 Uiso 1 1 calc R U . . .
C16 C 0.62820(16) 0.22317(13) 0.53546(11) 0.0233(6) Uani 1 1 d . . . . .
H16 H 0.6789 0.2128 0.5267 0.028 Uiso 1 1 calc R U . . .
C17 C 0.61197(14) 0.24832(12) 0.58323(10) 0.0182(5) Uani 1 1 d . . . . .
H17 H 0.6527 0.2559 0.6066 0.022 Uiso 1 1 calc R U . . .
N18 N 0.54073(12) 0.26274(9) 0.59859(8) 0.0135(4) Uani 1 1 d . . . . .
P20 P 0.53513(3) 0.39877(3) 0.64314(2) 0.01191(11) Uani 1 1 d . . . . .
C21 C 0.57948(14) 0.40514(11) 0.57853(10) 0.0157(5) Uani 1 1 d . . . . .
C22 C 0.65293(15) 0.38245(12) 0.57478(11) 0.0218(6) Uani 1 1 d . . . . .
H22 H 0.6758 0.3645 0.6045 0.026 Uiso 1 1 calc R U . . .
C23 C 0.69311(17) 0.38581(13) 0.52784(12) 0.0292(7) Uani 1 1 d . . . . .
H23 H 0.7431 0.3703 0.5256 0.035 Uiso 1 1 calc R U . . .
C24 C 0.65947(19) 0.41208(13) 0.48438(12) 0.0293(7) Uani 1 1 d . . . . .
H24 H 0.6866 0.4147 0.4524 0.035 Uiso 1 1 calc R U . . .
C25 C 0.58684(18) 0.43433(12) 0.48766(11) 0.0248(6) Uani 1 1 d . . . . .
H25 H 0.5640 0.4520 0.4578 0.030 Uiso 1 1 calc R U . . .
C26 C 0.54652(16) 0.43106(11) 0.53458(11) 0.0195(5) Uani 1 1 d . . . . .
H26 H 0.4965 0.4466 0.5365 0.023 Uiso 1 1 calc R U . . .
C31 C 0.44869(13) 0.44330(10) 0.64211(10) 0.0145(5) Uani 1 1 d . . . . .
C32 C 0.39122(14) 0.43120(11) 0.60587(11) 0.0184(5) Uani 1 1 d . . . . .
H32 H 0.3994 0.4021 0.5795 0.022 Uiso 1 1 calc R U . . .
C33 C 0.32234(15) 0.46120(12) 0.60803(12) 0.0241(6) Uani 1 1 d . . . . .
H33 H 0.2842 0.4533 0.5827 0.029 Uiso 1 1 calc R U . . .
C34 C 0.30948(16) 0.50263(13) 0.64724(13) 0.0271(7) Uani 1 1 d . . . . .
H34 H 0.2625 0.5232 0.6488 0.032 Uiso 1 1 calc R U . . .
C35 C 0.36500(16) 0.51410(13) 0.68416(13) 0.0268(6) Uani 1 1 d . . . . .
H35 H 0.3557 0.5421 0.7113 0.032 Uiso 1 1 calc R U . . .
C36 C 0.43443(15) 0.48479(11) 0.68172(11) 0.0210(6) Uani 1 1 d . . . . .
H36 H 0.4724 0.4930 0.7071 0.025 Uiso 1 1 calc R U . . .
C41 C 0.59829(13) 0.44685(10) 0.68117(10) 0.0142(5) Uani 1 1 d . . . . .
C42 C 0.60951(13) 0.43819(11) 0.73451(10) 0.0159(5) Uani 1 1 d . . . . .
H42 H 0.5889 0.4040 0.7511 0.019 Uiso 1 1 calc R U . . .
C43 C 0.65083(14) 0.47930(11) 0.76380(11) 0.0193(5) Uani 1 1 d . . . . .
H43 H 0.6585 0.4728 0.8001 0.023 Uiso 1 1 calc R U . . .
C44 C 0.68066(15) 0.52955(12) 0.74013(12) 0.0231(6) Uani 1 1 d . . . . .
H44 H 0.7083 0.5577 0.7602 0.028 Uiso 1 1 calc R U . . .
C45 C 0.66997(16) 0.53850(12) 0.68709(12) 0.0245(6) Uani 1 1 d . . . . .
H45 H 0.6906 0.5728 0.6708 0.029 Uiso 1 1 calc R U . . .
C46 C 0.62933(15) 0.49773(11) 0.65767(11) 0.0203(5) Uani 1 1 d . . . . .
H46 H 0.6224 0.5043 0.6213 0.024 Uiso 1 1 calc R U . . .
P50 P 0.48667(3) 0.20024(3) 0.70981(2) 0.01185(10) Uani 1 1 d . . . . .
C51 C 0.38593(14) 0.18194(10) 0.70549(11) 0.0159(5) Uani 1 1 d . . . . .
C52 C 0.33693(15) 0.19579(11) 0.74615(13) 0.0241(6) Uani 1 1 d . . . . .
H52 H 0.3565 0.2108 0.7782 0.029 Uiso 1 1 calc R U . . .
C53 C 0.25883(17) 0.18772(12) 0.74003(15) 0.0355(9) Uani 1 1 d . . . . .
H53 H 0.2255 0.1970 0.7681 0.043 Uiso 1 1 calc R U . . .
C54 C 0.22995(16) 0.16645(13) 0.69388(17) 0.0392(9) Uani 1 1 d . . . . .
H54 H 0.1769 0.1608 0.6901 0.047 Uiso 1 1 calc R U . . .
C55 C 0.27819(17) 0.15327(13) 0.65272(15) 0.0333(8) Uani 1 1 d . . . . .
H55 H 0.2581 0.1389 0.6206 0.040 Uiso 1 1 calc R U . . .
C56 C 0.35600(15) 0.16105(12) 0.65843(12) 0.0220(6) Uani 1 1 d . . . . .
H56 H 0.3889 0.1521 0.6301 0.026 Uiso 1 1 calc R U . . .
C61 C 0.50785(14) 0.19077(10) 0.77960(10) 0.0167(5) Uani 1 1 d . . . . .
C62 C 0.54103(14) 0.23615(11) 0.80878(10) 0.0167(5) Uani 1 1 d . . . . .
H62 H 0.5538 0.2727 0.7923 0.020 Uiso 1 1 calc R U . . .
C63 C 0.55569(15) 0.22856(12) 0.86172(11) 0.0208(5) Uani 1 1 d . . . . .
H63 H 0.5777 0.2600 0.8813 0.025 Uiso 1 1 calc R U . . .
C64 C 0.53824(18) 0.17501(13) 0.88608(11) 0.0268(6) Uani 1 1 d . . . . .
H64 H 0.5481 0.1698 0.9223 0.032 Uiso 1 1 calc R U . . .
C65 C 0.50633(19) 0.12925(13) 0.85716(11) 0.0291(6) Uani 1 1 d . . . . .
H65 H 0.4951 0.0924 0.8736 0.035 Uiso 1 1 calc R U . . .
C66 C 0.49067(17) 0.13686(12) 0.80447(11) 0.0242(6) Uani 1 1 d . . . . .
H66 H 0.4682 0.1054 0.7851 0.029 Uiso 1 1 calc R U . . .
C71 C 0.53216(14) 0.13434(10) 0.68143(10) 0.0146(5) Uani 1 1 d . . . . .
C72 C 0.60610(14) 0.13997(12) 0.66246(10) 0.0184(5) Uani 1 1 d . . . . .
H72 H 0.6313 0.1772 0.6646 0.022 Uiso 1 1 calc R U . . .
C73 C 0.64306(16) 0.09112(12) 0.64039(12) 0.0253(6) Uani 1 1 d . . . . .
H73 H 0.6927 0.0956 0.6265 0.030 Uiso 1 1 calc R U . . .
C74 C 0.60761(18) 0.03632(13) 0.63865(14) 0.0310(7) Uani 1 1 d . . . . .
H74 H 0.6330 0.0031 0.6238 0.037 Uiso 1 1 calc R U . . .
C75 C 0.53479(18) 0.02997(12) 0.65864(13) 0.0293(7) Uani 1 1 d . . . . .
H75 H 0.5107 -0.0078 0.6579 0.035 Uiso 1 1 calc R U . . .
C76 C 0.49741(15) 0.07844(10) 0.67953(11) 0.0212(5) Uani 1 1 d . . . . .
H76 H 0.4475 0.0738 0.6928 0.025 Uiso 1 1 calc R U . . .
O80 O 0.44129(17) 0.37848(16) 0.92631(11) 0.0596(8) Uani 1 1 d . . . . .
H80 H 0.4815 0.3797 0.9088 0.089 Uiso 1 1 calc R U . . .
C81 C 0.4482(3) 0.4158(2) 0.9701(2) 0.0758(15) Uani 1 1 d . . . . .
H81A H 0.4891 0.4012 0.9926 0.114 Uiso 1 1 calc R U . . .
H81B H 0.4004 0.4159 0.9896 0.114 Uiso 1 1 calc R U . . .
H81C H 0.4599 0.4564 0.9585 0.114 Uiso 1 1 calc R U . . .
O90 O 0.68431(16) 0.41196(13) 0.97121(12) 0.0543(7) Uani 1 1 d . . . . .
H90 H 0.6616 0.3985 0.9449 0.081 Uiso 1 1 calc R U . . .
C91 C 0.6541(3) 0.4662(2) 0.9845(3) 0.089(2) Uani 1 1 d . . . . .
H91A H 0.6073 0.4601 1.0045 0.134 Uiso 1 1 calc R U . . .
H91B H 0.6429 0.4888 0.9527 0.134 Uiso 1 1 calc R U . . .
H91C H 0.6906 0.4883 1.0059 0.134 Uiso 1 1 calc R U . . .
O100 O 0.33392(16) 0.20988(15) 0.43141(10) 0.0550(8) Uani 1 1 d . . . . .
H100 H 0.3683 0.1844 0.4273 0.083 Uiso 1 1 calc R U . . .
C101 C 0.3289(2) 0.24609(18) 0.38607(15) 0.0428(9) Uani 1 1 d . . . . .
H10A H 0.3039 0.2837 0.3950 0.064 Uiso 1 1 calc R U . . .
H10B H 0.2993 0.2254 0.3592 0.064 Uiso 1 1 calc R U . . .
H10C H 0.3799 0.2542 0.3727 0.064 Uiso 1 1 calc R U . . .
O110 O 0.77958(16) 0.12671(16) 0.54840(13) 0.0629(9) Uani 1 1 d . . . . .
H110 H 0.7496 0.1078 0.5291 0.094 Uiso 1 1 calc R U . . .
C111 C 0.8535(2) 0.1080(2) 0.53875(16) 0.0509(10) Uani 1 1 d . . . . .
H11A H 0.8754 0.1319 0.5105 0.076 Uiso 1 1 calc R U . . .
H11B H 0.8532 0.0660 0.5285 0.076 Uiso 1 1 calc R U . . .
H11C H 0.8840 0.1129 0.5705 0.076 Uiso 1 1 calc R U . . .
 
loop_
 _atom_site_aniso_label
 _atom_site_aniso_U_11
 _atom_site_aniso_U_22
 _atom_site_aniso_U_33
 _atom_site_aniso_U_23
 _atom_site_aniso_U_13
 _atom_site_aniso_U_12
Re 0.00994(4) 0.00874(3) 0.00938(4) 0.00014(3) -0.00031(3) -0.00010(3)
Cl1 0.0124(2) 0.0141(2) 0.0167(3) 0.0000(2) -0.00244(19) -0.0004(2)
Cl2 0.0342(4) 0.0258(3) 0.0289(4) 0.0004(3) -0.0038(3) 0.0037(3)
N1 0.0123(9) 0.0091(9) 0.0121(10) 0.0010(7) 0.0010(7) -0.0008(7)
C2 0.0175(11) 0.0115(11) 0.0145(12) 0.0001(9) -0.0003(9) -0.0009(8)
C3 0.0218(12) 0.0166(12) 0.0158(13) -0.0040(10) 0.0028(10) -0.0003(9)
C4 0.0188(12) 0.0170(12) 0.0231(14) -0.0003(10) 0.0085(10) 0.0027(9)
C5 0.0139(11) 0.0155(12) 0.0245(14) 0.0021(10) 0.0011(10) -0.0004(9)
C6 0.0133(10) 0.0092(10) 0.0163(12) 0.0024(9) 0.0004(9) -0.0008(8)
C7 0.0134(10) 0.0099(10) 0.0157(12) 0.0025(8) -0.0017(9) 0.0005(8)
C8 0.0148(11) 0.0170(12) 0.0227(14) 0.0027(10) -0.0039(9) -0.0002(9)
C9 0.0190(12) 0.0280(15) 0.0225(15) 0.0018(11) -0.0091(10) -0.0018(10)
C10 0.0253(13) 0.0225(13) 0.0138(13) 0.0009(10) -0.0067(10) -0.0013(10)
C11 0.0181(11) 0.0139(11) 0.0136(12) 0.0015(9) -0.0020(9) -0.0002(9)
N12 0.0136(9) 0.0102(9) 0.0109(9) 0.0019(7) -0.0019(7) -0.0001(7)
C13 0.0209(12) 0.0142(10) 0.0118(11) 0.0020(9) -0.0018(9) 0.0001(9)
C14 0.0269(14) 0.0240(12) 0.0155(12) -0.0027(10) -0.0014(11) 0.0006(11)
C15 0.0353(15) 0.0256(15) 0.0139(13) -0.0027(10) 0.0039(11) 0.0052(11)
C16 0.0254(14) 0.0268(14) 0.0177(14) -0.0014(11) 0.0064(11) 0.0066(11)
C17 0.0196(11) 0.0194(12) 0.0156(13) -0.0002(10) 0.0024(10) 0.0042(10)
N18 0.0178(10) 0.0112(9) 0.0114(10) 0.0004(7) 0.0013(8) 0.0007(7)
P20 0.0126(3) 0.0105(3) 0.0126(3) 0.0013(2) 0.0009(2) -0.0002(2)
C21 0.0210(12) 0.0115(11) 0.0147(12) 0.0010(9) 0.0046(9) -0.0020(9)
C22 0.0244(13) 0.0193(13) 0.0218(14) 0.0057(11) 0.0057(11) 0.0022(10)
C23 0.0287(15) 0.0268(15) 0.0321(17) 0.0048(13) 0.0140(13) 0.0056(12)
C24 0.0448(18) 0.0232(14) 0.0201(15) 0.0029(12) 0.0156(13) 0.0009(12)
C25 0.0395(16) 0.0196(13) 0.0154(14) 0.0024(11) 0.0032(12) -0.0015(11)
C26 0.0267(13) 0.0143(12) 0.0175(13) 0.0002(10) 0.0008(10) -0.0005(10)
C31 0.0144(11) 0.0103(10) 0.0188(13) 0.0033(9) 0.0022(9) 0.0017(8)
C32 0.0195(12) 0.0158(12) 0.0200(13) 0.0061(10) 0.0000(10) 0.0000(9)
C33 0.0167(12) 0.0228(14) 0.0327(17) 0.0139(12) -0.0026(11) -0.0004(10)
C34 0.0180(13) 0.0232(14) 0.0401(18) 0.0136(13) 0.0079(12) 0.0066(10)
C35 0.0257(14) 0.0200(13) 0.0346(18) 0.0012(12) 0.0103(12) 0.0059(11)
C36 0.0208(12) 0.0160(12) 0.0262(16) 0.0010(10) 0.0041(10) 0.0020(9)
C41 0.0118(10) 0.0118(10) 0.0191(13) -0.0026(9) 0.0014(9) 0.0010(8)
C42 0.0131(11) 0.0133(11) 0.0214(13) -0.0017(9) 0.0017(9) 0.0003(8)
C43 0.0178(12) 0.0172(12) 0.0229(14) -0.0047(10) -0.0019(10) 0.0001(9)
C44 0.0184(12) 0.0166(12) 0.0343(17) -0.0091(11) -0.0004(11) -0.0034(10)
C45 0.0246(13) 0.0146(12) 0.0344(17) -0.0012(11) 0.0041(12) -0.0075(10)
C46 0.0236(13) 0.0147(12) 0.0225(14) 0.0009(10) 0.0035(10) -0.0027(10)
P50 0.0127(2) 0.0103(2) 0.0126(3) 0.0008(2) -0.0002(2) 0.0000(2)
C51 0.0148(11) 0.0089(10) 0.0241(14) 0.0040(9) -0.0002(10) -0.0001(8)
C52 0.0231(13) 0.0116(12) 0.0375(17) 0.0043(11) 0.0098(11) 0.0022(10)
C53 0.0208(14) 0.0173(13) 0.068(3) 0.0125(14) 0.0194(15) 0.0060(10)
C54 0.0131(13) 0.0199(14) 0.084(3) 0.0194(16) -0.0054(15) -0.0003(10)
C55 0.0257(15) 0.0217(14) 0.052(2) 0.0117(14) -0.0195(14) -0.0074(11)
C56 0.0217(13) 0.0158(12) 0.0284(16) 0.0053(10) -0.0068(11) -0.0044(10)
C61 0.0194(11) 0.0151(11) 0.0154(11) 0.0035(8) -0.0002(9) 0.0017(9)
C62 0.0189(12) 0.0138(11) 0.0174(13) 0.0012(9) 0.0019(10) 0.0009(9)
C63 0.0246(13) 0.0210(13) 0.0169(13) -0.0032(10) -0.0023(10) 0.0030(10)
C64 0.0398(17) 0.0264(15) 0.0140(14) 0.0020(11) -0.0009(12) 0.0046(12)
C65 0.0469(18) 0.0207(13) 0.0196(14) 0.0089(10) 0.0009(13) -0.0008(13)
C66 0.0374(16) 0.0163(12) 0.0191(13) 0.0022(10) -0.0029(12) -0.0027(11)
C71 0.0179(11) 0.0111(10) 0.0149(13) 0.0009(9) 0.0002(9) 0.0013(8)
C72 0.0159(11) 0.0175(12) 0.0220(15) 0.0023(10) -0.0012(10) 0.0012(9)
C73 0.0196(13) 0.0227(14) 0.0334(17) 0.0032(12) 0.0066(11) 0.0054(10)
C74 0.0329(16) 0.0166(13) 0.043(2) -0.0024(13) 0.0123(14) 0.0074(11)
C75 0.0335(15) 0.0132(12) 0.0412(19) -0.0038(12) 0.0090(13) -0.0003(11)
C76 0.0215(12) 0.0082(10) 0.0339(16) 0.0005(9) 0.0064(11) -0.0009(9)
O80 0.0559(18) 0.090(2) 0.0326(16) -0.0062(16) -0.0013(13) -0.0079(17)
C81 0.081(4) 0.059(3) 0.087(4) -0.002(3) 0.023(3) 0.013(3)
O90 0.0507(17) 0.0611(19) 0.0511(19) -0.0018(14) -0.0042(14) -0.0080(14)
C91 0.058(3) 0.083(4) 0.127(5) -0.060(4) 0.003(3) 0.009(3)
O100 0.0541(17) 0.079(2) 0.0319(15) -0.0121(15) 0.0096(12) -0.0105(15)
C101 0.0352(18) 0.052(2) 0.041(2) -0.0082(18) 0.0046(16) -0.0049(16)
O110 0.0421(16) 0.086(2) 0.061(2) -0.0220(17) 0.0065(14) 0.0003(16)
C111 0.052(2) 0.062(3) 0.039(2) 0.0086(19) -0.0013(18) 0.017(2)
 
_geom_special_details
;
 All esds (except the esd in the dihedral angle between two l.s. planes)
 are estimated using the full covariance matrix.  The cell esds are taken
 into account individually in the estimation of esds in distances, angles
 and torsion angles; correlations between esds in cell parameters are only
 used when they are defined by crystal symmetry.  An approximate (isotropic)
 treatment of cell esds is used for estimating esds involving l.s. planes.
;
 
loop_
 _geom_bond_atom_site_label_1
 _geom_bond_atom_site_label_2
 _geom_bond_distance
 _geom_bond_site_symmetry_2
 _geom_bond_publ_flag
Re N12 2.0190(19) . ?
Re N18 2.115(2) . ?
Re N1 2.123(2) . ?
Re Cl1 2.4128(6) . ?
Re P20 2.4209(6) . ?
Re P50 2.4391(6) . ?
N1 C2 1.362(3) . ?
N1 C6 1.369(3) . ?
C2 C3 1.377(3) . ?
C3 C4 1.391(4) . ?
C4 C5 1.374(4) . ?
C5 C6 1.397(3) . ?
C6 C7 1.447(3) . ?
C7 N12 1.367(3) . ?
C7 C8 1.393(3) . ?
C8 C9 1.382(4) . ?
C9 C10 1.390(4) . ?
C10 C11 1.390(3) . ?
C11 N12 1.370(3) . ?
C11 C13 1.456(3) . ?
C13 N18 1.373(3) . ?
C13 C14 1.392(3) . ?
C14 C15 1.382(4) . ?
C15 C16 1.389(4) . ?
C16 C17 1.376(4) . ?
C17 N18 1.356(3) . ?
P20 C31 1.824(2) . ?
P20 C41 1.832(2) . ?
P20 C21 1.834(3) . ?
C21 C26 1.393(4) . ?
C21 C22 1.396(4) . ?
C22 C23 1.396(4) . ?
C23 C24 1.391(4) . ?
C24 C25 1.378(4) . ?
C25 C26 1.397(4) . ?
C31 C36 1.400(4) . ?
C31 C32 1.400(4) . ?
C32 C33 1.391(4) . ?
C33 C34 1.387(4) . ?
C34 C35 1.385(4) . ?
C35 C36 1.392(4) . ?
C41 C42 1.392(4) . ?
C41 C46 1.403(3) . ?
C42 C43 1.395(3) . ?
C43 C44 1.385(4) . ?
C44 C45 1.384(4) . ?
C45 C46 1.385(4) . ?
P50 C51 1.827(3) . ?
P50 C71 1.834(2) . ?
P50 C61 1.836(3) . ?
C51 C52 1.387(4) . ?
C51 C56 1.396(4) . ?
C52 C53 1.398(4) . ?
C53 C54 1.372(5) . ?
C54 C55 1.386(5) . ?
C55 C56 1.391(4) . ?
C61 C62 1.393(3) . ?
C61 C66 1.402(3) . ?
C62 C63 1.389(4) . ?
C63 C64 1.390(4) . ?
C64 C65 1.386(4) . ?
C65 C66 1.386(4) . ?
C71 C72 1.397(3) . ?
C71 C76 1.399(3) . ?
C72 C73 1.396(4) . ?
C73 C74 1.382(4) . ?
C74 C75 1.390(4) . ?
C75 C76 1.381(4) . ?
O80 C81 1.404(6) . ?
O90 C91 1.373(5) . ?
O100 C101 1.419(5) . ?
O110 C111 1.393(5) . ?
 
loop_
 _geom_angle_atom_site_label_1
 _geom_angle_atom_site_label_2
 _geom_angle_atom_site_label_3
 _geom_angle
 _geom_angle_site_symmetry_1
 _geom_angle_site_symmetry_3
 _geom_angle_publ_flag
N12 Re N18 76.51(8) . . ?
N12 Re N1 76.15(8) . . ?
N18 Re N1 152.58(8) . . ?
N12 Re Cl1 169.65(6) . . ?
N18 Re Cl1 93.15(6) . . ?
N1 Re Cl1 114.21(6) . . ?
N12 Re P20 93.96(6) . . ?
N18 Re P20 91.80(6) . . ?
N1 Re P20 88.12(5) . . ?
Cl1 Re P20 86.74(2) . . ?
N12 Re P50 91.05(6) . . ?
N18 Re P50 93.06(6) . . ?
N1 Re P50 89.39(5) . . ?
Cl1 Re P50 89.01(2) . . ?
P20 Re P50 173.71(2) . . ?
C2 N1 C6 116.9(2) . . ?
C2 N1 Re 127.43(16) . . ?
C6 N1 Re 115.61(16) . . ?
N1 C2 C3 123.2(2) . . ?
C2 C3 C4 119.4(2) . . ?
C5 C4 C3 118.6(2) . . ?
C4 C5 C6 119.9(2) . . ?
N1 C6 C5 121.9(2) . . ?
N1 C6 C7 114.8(2) . . ?
C5 C6 C7 123.3(2) . . ?
N12 C7 C8 120.8(2) . . ?
N12 C7 C6 113.0(2) . . ?
C8 C7 C6 126.2(2) . . ?
C9 C8 C7 119.6(2) . . ?
C8 C9 C10 119.8(2) . . ?
C9 C10 C11 119.2(3) . . ?
N12 C11 C10 121.0(2) . . ?
N12 C11 C13 113.1(2) . . ?
C10 C11 C13 125.9(2) . . ?
C7 N12 C11 119.5(2) . . ?
C7 N12 Re 120.37(16) . . ?
C11 N12 Re 120.11(16) . . ?
N18 C13 C14 121.5(2) . . ?
N18 C13 C11 114.4(2) . . ?
C14 C13 C11 124.0(2) . . ?
C15 C14 C13 120.0(3) . . ?
C14 C15 C16 118.5(3) . . ?
C17 C16 C15 119.3(3) . . ?
N18 C17 C16 123.2(3) . . ?
C17 N18 C13 117.3(2) . . ?
C17 N18 Re 126.82(18) . . ?
C13 N18 Re 115.87(16) . . ?
C31 P20 C41 101.09(11) . . ?
C31 P20 C21 107.50(12) . . ?
C41 P20 C21 99.96(11) . . ?
C31 P20 Re 110.55(8) . . ?
C41 P20 Re 120.66(8) . . ?
C21 P20 Re 115.42(8) . . ?
C26 C21 C22 119.0(2) . . ?
C26 C21 P20 125.6(2) . . ?
C22 C21 P20 115.4(2) . . ?
C21 C22 C23 120.7(3) . . ?
C24 C23 C22 119.5(3) . . ?
C25 C24 C23 120.1(3) . . ?
C24 C25 C26 120.4(3) . . ?
C21 C26 C25 120.2(3) . . ?
C36 C31 C32 118.6(2) . . ?
C36 C31 P20 120.4(2) . . ?
C32 C31 P20 120.54(19) . . ?
C33 C32 C31 120.8(3) . . ?
C34 C33 C32 119.8(3) . . ?
C35 C34 C33 120.1(3) . . ?
C34 C35 C36 120.2(3) . . ?
C35 C36 C31 120.4(3) . . ?
C42 C41 C46 118.6(2) . . ?
C42 C41 P20 121.62(18) . . ?
C46 C41 P20 119.4(2) . . ?
C41 C42 C43 120.5(2) . . ?
C44 C43 C42 120.3(3) . . ?
C45 C44 C43 119.7(3) . . ?
C44 C45 C46 120.4(3) . . ?
C45 C46 C41 120.6(3) . . ?
C51 P50 C71 102.70(11) . . ?
C51 P50 C61 103.33(12) . . ?
C71 P50 C61 101.65(11) . . ?
C51 P50 Re 109.25(8) . . ?
C71 P50 Re 120.28(8) . . ?
C61 P50 Re 117.47(8) . . ?
C52 C51 C56 119.1(2) . . ?
C52 C51 P50 120.7(2) . . ?
C56 C51 P50 119.7(2) . . ?
C51 C52 C53 120.1(3) . . ?
C54 C53 C52 120.5(3) . . ?
C53 C54 C55 120.0(3) . . ?
C54 C55 C56 120.0(3) . . ?
C55 C56 C51 120.4(3) . . ?
C62 C61 C66 118.7(2) . . ?
C62 C61 P50 121.43(18) . . ?
C66 C61 P50 119.82(19) . . ?
C63 C62 C61 120.7(2) . . ?
C62 C63 C64 120.1(3) . . ?
C65 C64 C63 119.6(3) . . ?
C64 C65 C66 120.5(3) . . ?
C65 C66 C61 120.3(3) . . ?
C72 C71 C76 118.6(2) . . ?
C72 C71 P50 118.20(19) . . ?
C76 C71 P50 123.18(19) . . ?
C73 C72 C71 120.3(2) . . ?
C74 C73 C72 120.2(3) . . ?
C73 C74 C75 119.9(3) . . ?
C76 C75 C74 120.2(3) . . ?
C75 C76 C71 120.8(2) . . ?
 
loop_
 _geom_hbond_atom_site_label_D 
 _geom_hbond_atom_site_label_H 
 _geom_hbond_atom_site_label_A 
 _geom_hbond_distance_DH 
 _geom_hbond_distance_HA 
 _geom_hbond_distance_DA 
 _geom_hbond_angle_DHA 
 _geom_hbond_site_symmetry_A 
O80 H80 Cl2  0.84 2.22 3.056(3) 173.2 .
O90 H90 Cl2  0.84 2.24 3.064(3) 166.8 .
O100 H100 O80  0.84 1.91 2.747(4) 172.2 7_565
O110 H110 O90  0.84 1.93 2.734(4) 161.0 7_565
 
_refine_diff_density_max    0.937
_refine_diff_density_min   -1.174
_refine_diff_density_rms    0.112

_shelxl_version_number 2013-2

_shelx_res_file
;
TITL [(tpy)(PPh3)2ReCl]Cl * 4 MeOH
TITL 8747 Mei Wang in Pbca ; WGT-WM-071-01
CELL 0.71073  17.640  22.476  25.573  90.000  90.000  90.000
ZERR    8.00   0.002   0.002   0.003   0.000   0.000   0.000
LATT  1
SYMM 0.5-X, -Y, 0.5+Z
SYMM -X, 0.5+Y, 0.5-Z
SYMM 0.5+X, 0.5-Y, -Z
SFAC C H N P CL RE O
UNIT 440 456 24 16 16 8 32

OMIT -3 63

TEMP -173

OMIT 0 2 0
OMIT 0 0 2
OMIT 0 2 1
OMIT 1 1 1
OMIT 1 2 1
OMIT 1 0 2
OMIT 2 1 0

ACTA

EQIV $1 x, -y+1/2, z-1/2

HTAB O80 Cl2
HTAB O90 Cl2
HTAB O100 O80_$1
HTAB O110 O90_$1

L.S. 8
BOND
FMAP 2
PLAN 50

WGHT    0.011900   21.704000
FVAR       0.03687
RE    6    0.508042    0.298318    0.671745    11.00000    0.00994    0.00874 =
         0.00938    0.00014   -0.00031   -0.00010
CL1   5    0.635700    0.296130    0.705571    11.00000    0.01238    0.01411 =
         0.01671   -0.00003   -0.00244   -0.00038
CL2   5    0.594900    0.384741    0.871293    11.00000    0.03420    0.02583 =
         0.02886    0.00044   -0.00383    0.00371
N1    3    0.426939    0.334457    0.724233    11.00000    0.01230    0.00915 =
         0.01207    0.00102    0.00105   -0.00075
C2    1    0.439911    0.357810    0.772564    11.00000    0.01747    0.01148 =
         0.01445    0.00011   -0.00032   -0.00093
AFIX  43
H2    2    0.489963    0.356272    0.786210    11.00000   -1.20000
AFIX   0
C3    1    0.384032    0.383541    0.802622    11.00000    0.02184    0.01663 =
         0.01575   -0.00400    0.00279   -0.00030
AFIX  43
H3    2    0.395784    0.399491    0.836056    11.00000   -1.20000
AFIX   0
C4    1    0.310252    0.385961    0.783583    11.00000    0.01879    0.01697 =
         0.02314   -0.00026    0.00854    0.00267
AFIX  43
H4    2    0.270959    0.403745    0.803611    11.00000   -1.20000
AFIX   0
C5    1    0.295377    0.362090    0.735193    11.00000    0.01385    0.01548 =
         0.02449    0.00207    0.00107   -0.00041
AFIX  43
H5    2    0.245316    0.363002    0.721521    11.00000   -1.20000
AFIX   0
C6    1    0.353963    0.336473    0.706113    11.00000    0.01325    0.00920 =
         0.01627    0.00237    0.00045   -0.00084
C7    1    0.343222    0.311581    0.654468    11.00000    0.01340    0.00994 =
         0.01573    0.00251   -0.00172    0.00046
C8    1    0.274589    0.306634    0.627885    11.00000    0.01479    0.01701 =
         0.02265    0.00272   -0.00394   -0.00020
AFIX  43
H8    2    0.228734    0.318832    0.644153    11.00000   -1.20000
AFIX   0
C9    1    0.273643    0.283866    0.577695    11.00000    0.01897    0.02799 =
         0.02254    0.00175   -0.00907   -0.00182
AFIX  43
H9    2    0.227085    0.280387    0.559276    11.00000   -1.20000
AFIX   0
C10   1    0.341022    0.266066    0.554233    11.00000    0.02526    0.02250 =
         0.01385    0.00094   -0.00668   -0.00129
AFIX  43
H10   2    0.340989    0.250828    0.519583    11.00000   -1.20000
AFIX   0
C11   1    0.408445    0.270822    0.582063    11.00000    0.01812    0.01393 =
         0.01355    0.00154   -0.00201   -0.00019
N12   3    0.409484    0.293330    0.631841    11.00000    0.01356    0.01023 =
         0.01087    0.00189   -0.00187   -0.00012
C13   1    0.483246    0.253723    0.563275    11.00000    0.02086    0.01422 =
         0.01175    0.00204   -0.00185    0.00015
C14   1    0.497020    0.229457    0.514083    11.00000    0.02691    0.02395 =
         0.01554   -0.00274   -0.00143    0.00059
AFIX  43
H14   2    0.456429    0.224197    0.490110    11.00000   -1.20000
AFIX   0
C15   1    0.569752    0.213032    0.500155    11.00000    0.03525    0.02556 =
         0.01393   -0.00266    0.00393    0.00518
AFIX  43
H15   2    0.579571    0.195200    0.467162    11.00000   -1.20000
AFIX   0
C16   1    0.628203    0.223165    0.535455    11.00000    0.02538    0.02679 =
         0.01768   -0.00137    0.00637    0.00664
AFIX  43
H16   2    0.678863    0.212840    0.526706    11.00000   -1.20000
AFIX   0
C17   1    0.611973    0.248317    0.583234    11.00000    0.01958    0.01941 =
         0.01563   -0.00020    0.00245    0.00423
AFIX  43
H17   2    0.652689    0.255945    0.606607    11.00000   -1.20000
AFIX   0
N18   3    0.540729    0.262744    0.598586    11.00000    0.01784    0.01122 =
         0.01139    0.00037    0.00128    0.00066
P20   4    0.535132    0.398767    0.643143    11.00000    0.01258    0.01055 =
         0.01261    0.00130    0.00087   -0.00018
C21   1    0.579478    0.405141    0.578527    11.00000    0.02100    0.01155 =
         0.01467    0.00104    0.00456   -0.00197
C22   1    0.652928    0.382453    0.574776    11.00000    0.02439    0.01928 =
         0.02183    0.00572    0.00573    0.00219
AFIX  43
H22   2    0.675825    0.364534    0.604484    11.00000   -1.20000
AFIX   0
C23   1    0.693114    0.385808    0.527838    11.00000    0.02872    0.02684 =
         0.03206    0.00484    0.01401    0.00559
AFIX  43
H23   2    0.743086    0.370260    0.525586    11.00000   -1.20000
AFIX   0
C24   1    0.659471    0.412081    0.484377    11.00000    0.04476    0.02316 =
         0.02011    0.00289    0.01564    0.00090
AFIX  43
H24   2    0.686628    0.414681    0.452379    11.00000   -1.20000
AFIX   0
C25   1    0.586835    0.434335    0.487660    11.00000    0.03947    0.01965 =
         0.01543    0.00238    0.00324   -0.00148
AFIX  43
H25   2    0.564029    0.452020    0.457812    11.00000   -1.20000
AFIX   0
C26   1    0.546519    0.431063    0.534584    11.00000    0.02670    0.01431 =
         0.01749    0.00022    0.00077   -0.00052
AFIX  43
H26   2    0.496492    0.446556    0.536532    11.00000   -1.20000
AFIX   0
C31   1    0.448692    0.443302    0.642114    11.00000    0.01438    0.01030 =
         0.01882    0.00332    0.00223    0.00175
C32   1    0.391225    0.431201    0.605870    11.00000    0.01947    0.01580 =
         0.02004    0.00608    0.00001   -0.00002
AFIX  43
H32   2    0.399389    0.402147    0.579483    11.00000   -1.20000
AFIX   0
C33   1    0.322344    0.461197    0.608033    11.00000    0.01668    0.02281 =
         0.03271    0.01388   -0.00260   -0.00037
AFIX  43
H33   2    0.284209    0.453331    0.582729    11.00000   -1.20000
AFIX   0
C34   1    0.309476    0.502632    0.647237    11.00000    0.01798    0.02321 =
         0.04005    0.01364    0.00788    0.00658
AFIX  43
H34   2    0.262470    0.523187    0.648757    11.00000   -1.20000
AFIX   0
C35   1    0.364996    0.514097    0.684161    11.00000    0.02574    0.01996 =
         0.03464    0.00117    0.01027    0.00594
AFIX  43
H35   2    0.355671    0.542064    0.711261    11.00000   -1.20000
AFIX   0
C36   1    0.434429    0.484792    0.681717    11.00000    0.02079    0.01597 =
         0.02621    0.00097    0.00411    0.00205
AFIX  43
H36   2    0.472356    0.493006    0.707083    11.00000   -1.20000
AFIX   0
C41   1    0.598287    0.446848    0.681173    11.00000    0.01184    0.01179 =
         0.01911   -0.00256    0.00137    0.00102
C42   1    0.609513    0.438187    0.734506    11.00000    0.01310    0.01326 =
         0.02138   -0.00166    0.00170    0.00034
AFIX  43
H42   2    0.588875    0.404010    0.751091    11.00000   -1.20000
AFIX   0
C43   1    0.650829    0.479296    0.763797    11.00000    0.01780    0.01716 =
         0.02292   -0.00473   -0.00192    0.00007
AFIX  43
H43   2    0.658540    0.472803    0.800117    11.00000   -1.20000
AFIX   0
C44   1    0.680656    0.529548    0.740129    11.00000    0.01842    0.01655 =
         0.03435   -0.00912   -0.00042   -0.00343
AFIX  43
H44   2    0.708312    0.557724    0.760200    11.00000   -1.20000
AFIX   0
C45   1    0.669966    0.538503    0.687093    11.00000    0.02463    0.01459 =
         0.03440   -0.00124    0.00414   -0.00753
AFIX  43
H45   2    0.690623    0.572828    0.670757    11.00000   -1.20000
AFIX   0
C46   1    0.629333    0.497731    0.657670    11.00000    0.02361    0.01469 =
         0.02250    0.00085    0.00348   -0.00274
AFIX  43
H46   2    0.622433    0.504279    0.621280    11.00000   -1.20000
AFIX   0
P50   4    0.486666    0.200236    0.709806    11.00000    0.01267    0.01032 =
         0.01257    0.00079   -0.00023    0.00004
C51   1    0.385934    0.181936    0.705493    11.00000    0.01477    0.00885 =
         0.02407    0.00396   -0.00020   -0.00007
C52   1    0.336933    0.195788    0.746147    11.00000    0.02309    0.01159 =
         0.03747    0.00431    0.00978    0.00220
AFIX  43
H52   2    0.356459    0.210767    0.778167    11.00000   -1.20000
AFIX   0
C53   1    0.258828    0.187720    0.740035    11.00000    0.02077    0.01735 =
         0.06845    0.01249    0.01943    0.00604
AFIX  43
H53   2    0.225526    0.197039    0.768058    11.00000   -1.20000
AFIX   0
C54   1    0.229947    0.166452    0.693880    11.00000    0.01312    0.01994 =
         0.08443    0.01940   -0.00544   -0.00033
AFIX  43
H54   2    0.176860    0.160758    0.690131    11.00000   -1.20000
AFIX   0
C55   1    0.278188    0.153272    0.652720    11.00000    0.02570    0.02168 =
         0.05240    0.01171   -0.01949   -0.00736
AFIX  43
H55   2    0.258147    0.138935    0.620624    11.00000   -1.20000
AFIX   0
C56   1    0.355998    0.161046    0.658426    11.00000    0.02167    0.01579 =
         0.02842    0.00528   -0.00680   -0.00439
AFIX  43
H56   2    0.388947    0.152082    0.630117    11.00000   -1.20000
AFIX   0
C61   1    0.507854    0.190769    0.779601    11.00000    0.01944    0.01511 =
         0.01540    0.00347   -0.00019    0.00168
C62   1    0.541034    0.236155    0.808779    11.00000    0.01888    0.01381 =
         0.01744    0.00116    0.00186    0.00095
AFIX  43
H62   2    0.553776    0.272688    0.792294    11.00000   -1.20000
AFIX   0
C63   1    0.555686    0.228563    0.861717    11.00000    0.02462    0.02100 =
         0.01691   -0.00321   -0.00235    0.00302
AFIX  43
H63   2    0.577679    0.260044    0.881321    11.00000   -1.20000
AFIX   0
C64   1    0.538244    0.175007    0.886076    11.00000    0.03984    0.02642 =
         0.01404    0.00199   -0.00088    0.00457
AFIX  43
H64   2    0.548132    0.169795    0.922305    11.00000   -1.20000
AFIX   0
C65   1    0.506327    0.129249    0.857164    11.00000    0.04688    0.02074 =
         0.01962    0.00885    0.00087   -0.00079
AFIX  43
H65   2    0.495094    0.092380    0.873593    11.00000   -1.20000
AFIX   0
C66   1    0.490669    0.136861    0.804467    11.00000    0.03738    0.01628 =
         0.01907    0.00224   -0.00291   -0.00269
AFIX  43
H66   2    0.468184    0.105390    0.785118    11.00000   -1.20000
AFIX   0
C71   1    0.532160    0.134336    0.681426    11.00000    0.01789    0.01110 =
         0.01487    0.00094    0.00020    0.00135
C72   1    0.606098    0.139968    0.662460    11.00000    0.01588    0.01745 =
         0.02201    0.00229   -0.00119    0.00116
AFIX  43
H72   2    0.631344    0.177225    0.664593    11.00000   -1.20000
AFIX   0
C73   1    0.643057    0.091125    0.640393    11.00000    0.01965    0.02272 =
         0.03344    0.00322    0.00662    0.00535
AFIX  43
H73   2    0.692704    0.095566    0.626537    11.00000   -1.20000
AFIX   0
C74   1    0.607607    0.036318    0.638650    11.00000    0.03289    0.01661 =
         0.04348   -0.00242    0.01234    0.00736
AFIX  43
H74   2    0.632960    0.003062    0.623822    11.00000   -1.20000
AFIX   0
C75   1    0.534790    0.029968    0.658637    11.00000    0.03348    0.01322 =
         0.04123   -0.00378    0.00895   -0.00030
AFIX  43
H75   2    0.510666   -0.007812    0.657924    11.00000   -1.20000
AFIX   0
C76   1    0.497414    0.078444    0.679532    11.00000    0.02150    0.00817 =
         0.03395    0.00052    0.00637   -0.00094
AFIX  43
H76   2    0.447460    0.073765    0.692789    11.00000   -1.20000
AFIX   0

O80   7    0.441288    0.378477    0.926309    11.00000    0.05588    0.09032 =
         0.03263   -0.00623   -0.00132   -0.00793
AFIX 147
H80   2    0.481504    0.379690    0.908751    11.00000   -1.50000
AFIX   0
C81   1    0.448196    0.415819    0.970073    11.00000    0.08126    0.05946 =
         0.08663   -0.00178    0.02267    0.01348
AFIX 137
H81A  2    0.489066    0.401234    0.992643    11.00000   -1.50000
H81B  2    0.400407    0.415931    0.989615    11.00000   -1.50000
H81C  2    0.459934    0.456353    0.958503    11.00000   -1.50000
AFIX   0
O90   7    0.684309    0.411957    0.971205    11.00000    0.05072    0.06114 =
         0.05108   -0.00177   -0.00417   -0.00800
AFIX 147
H90   2    0.661609    0.398514    0.944858    11.00000   -1.50000
AFIX   0
C91   1    0.654124    0.466162    0.984520    11.00000    0.05765    0.08325 =
         0.12682   -0.05961    0.00285    0.00863
AFIX 137
H91A  2    0.607301    0.460136    1.004453    11.00000   -1.50000
H91B  2    0.642895    0.488803    0.952698    11.00000   -1.50000
H91C  2    0.690623    0.488252    1.005915    11.00000   -1.50000
AFIX   0
O100  7    0.333919    0.209881    0.431412    11.00000    0.05410    0.07905 =
         0.03189   -0.01207    0.00961   -0.01047
AFIX 147
H100  2    0.368282    0.184435    0.427300    11.00000   -1.50000
AFIX   0
C101  1    0.328874    0.246088    0.386072    11.00000    0.03525    0.05185 =
         0.04125   -0.00820    0.00456   -0.00485
AFIX 137
H10A  2    0.303879    0.283693    0.394955    11.00000   -1.50000
H10B  2    0.299338    0.225358    0.359211    11.00000   -1.50000
H10C  2    0.379923    0.254212    0.372744    11.00000   -1.50000
AFIX   0
O110  7    0.779576    0.126707    0.548397    11.00000    0.04208    0.08596 =
         0.06056   -0.02198    0.00652    0.00032
AFIX 147
H110  2    0.749556    0.107790    0.529065    11.00000   -1.50000
AFIX   0
C111  1    0.853550    0.107980    0.538749    11.00000    0.05207    0.06172 =
         0.03891    0.00860   -0.00130    0.01691
AFIX 137
H11A  2    0.875404    0.131904    0.510480    11.00000   -1.50000
H11B  2    0.853242    0.065970    0.528489    11.00000   -1.50000
H11C  2    0.884040    0.112891    0.570491    11.00000   -1.50000
AFIX   0
HKLF 4

REM  8747 Mei Wang in Pbca ; WGT-WM-071-01
REM R1 =  0.0280 for   12368 Fo > 4sig(Fo)  and  0.0494 for all   16178 data
REM    612 parameters refined using      0 restraints

END

WGHT      0.0117     21.8039

REM Highest difference peak  0.937,  deepest hole -1.174,  1-sigma level  0.112
Q1    1   0.5978  0.4196  0.9022  11.00000  0.05    0.94
Q2    1   0.5564  0.3803  0.8875  11.00000  0.05    0.88
Q3    1   0.4007  0.4418  1.0511  11.00000  0.05    0.76
Q4    1   0.4215  0.4164  1.0336  11.00000  0.05    0.72
Q5    1   0.4298  0.4757  1.0037  11.00000  0.05    0.69
Q6    1   0.3972  0.3643  0.9316  11.00000  0.05    0.59
Q7    1   0.4599  0.3336  0.6738  11.00000  0.05    0.58
Q8    1   0.6009  0.4412  0.7076  11.00000  0.05    0.56
Q9    1   0.2579  0.1700  0.6757  11.00000  0.05    0.56
Q10   1   0.5356  0.2252  0.5059  11.00000  0.05    0.54
Q11   1   0.4829  0.4885  0.6706  11.00000  0.05    0.53
Q12   1   0.4370  0.4669  0.6558  11.00000  0.05    0.53
Q13   1   0.5017  0.1960  0.7440  11.00000  0.05    0.53
Q14   1   0.8114  0.1601  0.5749  11.00000  0.05    0.52
Q15   1   0.3439  0.3222  0.6823  11.00000  0.05    0.51
Q16   1   0.5567  0.3201  0.6658  11.00000  0.05    0.50
Q17   1   0.3172  0.2828  0.5685  11.00000  0.05    0.50
Q18   1   0.4958  0.2484  0.5328  11.00000  0.05    0.49
Q19   1   0.4857  0.4194  1.0425  11.00000  0.05    0.48
Q20   1   0.4805  0.2061  0.8592  11.00000  0.05    0.47
Q21   1   0.4829  0.4272  0.6395  11.00000  0.05    0.47
Q22   1   0.4621  0.2605  0.6668  11.00000  0.05    0.47
Q23   1   0.3611  0.1669  0.6906  11.00000  0.05    0.46
Q24   1   0.4789  0.4136  0.6446  11.00000  0.05    0.46
Q25   1   0.5052  0.0502  0.6751  11.00000  0.05    0.45
Q26   1   0.5386  0.1987  0.8653  11.00000  0.05    0.44
Q27   1   0.4611  0.0879  0.6841  11.00000  0.05    0.44
Q28   1   0.3421  0.4998  0.6692  11.00000  0.05    0.44
Q29   1   0.4426  0.3111  0.6926  11.00000  0.05    0.44
Q30   1   0.4421  0.2972  0.6512  11.00000  0.05    0.43
Q31   1   0.6210  0.0334  0.6687  11.00000  0.05    0.43
Q32   1   0.4410  0.2502  0.5787  11.00000  0.05    0.43
Q33   1   0.5362  0.2653  0.6391  11.00000  0.05    0.42
Q34   1   0.4649  0.1013  0.6519  11.00000  0.05    0.42
Q35   1   0.4363  0.1881  0.7123  11.00000  0.05    0.42
Q36   1   0.2978  0.1831  0.7445  11.00000  0.05    0.42
Q37   1   0.4785  0.2867  0.6394  11.00000  0.05    0.42
Q38   1   0.6211  0.5329  0.9171  11.00000  0.05    0.41
Q39   1   0.6022  0.0789  0.6219  11.00000  0.05    0.41
Q40   1   0.4166  0.2882  0.6073  11.00000  0.05    0.41
Q41   1   0.2458  0.1770  0.7155  11.00000  0.05    0.41
Q42   1   0.3377  0.1479  0.4816  11.00000  0.05    0.41
Q43   1   0.6760  0.3873  0.5518  11.00000  0.05    0.41
Q44   1   0.5603  0.3986  0.6015  11.00000  0.05    0.40
Q45   1   0.3049  0.2577  0.4279  11.00000  0.05    0.40
Q46   1   0.4814  0.4134  1.0655  11.00000  0.05    0.40
Q47   1   0.5387  0.2343  0.8351  11.00000  0.05    0.39
Q48   1   0.3547  0.2966  0.3963  11.00000  0.05    0.39
Q49   1   0.5622  0.1166  0.6772  11.00000  0.05    0.39
Q50   1   0.4435  0.2710  0.5600  11.00000  0.05    0.38
;
_shelx_res_checksum   93204

#===END

 
data_3
 
_audit_creation_method            SHELXL-2013
_audit_creation_date              2014-01-22
_audit_block_code                 WGT-WM-057-01
_chemical_name_systematic
;
 ?
;
_chemical_name_common             ?
_chemical_melting_point           ?
_chemical_compound_source         'toluene, diethylether'
_chemical_formula_moiety          
 'C36 H36 N6 Re' 
_chemical_formula_sum
 'C36 H36 N6 Re' 
_chemical_formula_weight          738.91

loop_
 _atom_type_symbol
 _atom_type_description
 _atom_type_scat_dispersion_real
 _atom_type_scat_dispersion_imag
 _atom_type_scat_source
 'C'  'C'   0.0033   0.0016
 'International Tables Vol C Tables 4.2.6.8 and 6.1.1.4'
 'H'  'H'   0.0000   0.0000
 'International Tables Vol C Tables 4.2.6.8 and 6.1.1.4'
 'N'  'N'   0.0061   0.0033
 'International Tables Vol C Tables 4.2.6.8 and 6.1.1.4'
 'Re'  'Re'  -1.0185   7.2310
 'International Tables Vol C Tables 4.2.6.8 and 6.1.1.4'
 
_space_group_crystal_system       trigonal
_space_group_IT_number            167
_space_group_name_H-M_alt         'R -3 c :H'
_space_group_name_Hall            '-R 3 2"c'
 
_shelx_space_group_comment
;
The symmetry employed for this shelxl refinement is uniquely defined
by the following loop, which should always be used as a source of
symmetry information in preference to the above space-group names.
They are only intended as comments.
;
 
loop_
 _space_group_symop_operation_xyz
 'x, y, z'
 '-y, x-y, z'
 '-x+y, -x, z'
 'y, x, -z+1/2'
 'x-y, -y, -z+1/2'
 '-x, -x+y, -z+1/2'
 'x+2/3, y+1/3, z+1/3'
 '-y+2/3, x-y+1/3, z+1/3'
 '-x+y+2/3, -x+1/3, z+1/3'
 'y+2/3, x+1/3, -z+5/6'
 'x-y+2/3, -y+1/3, -z+5/6'
 '-x+2/3, -x+y+1/3, -z+5/6'
 'x+1/3, y+2/3, z+2/3'
 '-y+1/3, x-y+2/3, z+2/3'
 '-x+y+1/3, -x+2/3, z+2/3'
 'y+1/3, x+2/3, -z+7/6'
 'x-y+1/3, -y+2/3, -z+7/6'
 '-x+1/3, -x+y+2/3, -z+7/6'
 '-x, -y, -z'
 'y, -x+y, -z'
 'x-y, x, -z'
 '-y, -x, z-1/2'
 '-x+y, y, z-1/2'
 'x, x-y, z-1/2'
 '-x+2/3, -y+1/3, -z+1/3'
 'y+2/3, -x+y+1/3, -z+1/3'
 'x-y+2/3, x+1/3, -z+1/3'
 '-y+2/3, -x+1/3, z-1/6'
 '-x+y+2/3, y+1/3, z-1/6'
 'x+2/3, x-y+1/3, z-1/6'
 '-x+1/3, -y+2/3, -z+2/3'
 'y+1/3, -x+y+2/3, -z+2/3'
 'x-y+1/3, x+2/3, -z+2/3'
 '-y+1/3, -x+2/3, z+1/6'
 '-x+y+1/3, y+2/3, z+1/6'
 'x+1/3, x-y+2/3, z+1/6'
 
_cell_length_a                    18.3091(10)
_cell_length_b                    18.3091(10)
_cell_length_c                    15.383(2)
_cell_angle_alpha                 90
_cell_angle_beta                  90
_cell_angle_gamma                 120
_cell_volume                      4465.9(8)
_cell_formula_units_Z             6
_cell_measurement_temperature     100(2)
_cell_measurement_reflns_used     43314
_cell_measurement_theta_min       2.889
_cell_measurement_theta_max       33.0947

loop_
 _exptl_crystal_face_index_h
 _exptl_crystal_face_index_k
 _exptl_crystal_face_index_l
 _exptl_crystal_face_perp_dist
    1.00    0.00   -1.00    0.0600
   -1.00    0.00    1.00    0.0600
    0.00    1.00    0.00    0.0600
    0.00   -1.00    0.00    0.0600
    1.00   -1.00   -1.00    0.0500
   -1.00    1.00    1.00    0.0500
   -1.00    1.00    0.00    0.0400
    1.00   -1.00    0.00    0.0400
    2.00   -1.00    0.00    0.0500
   -2.00    1.00    0.00    0.0500

_exptl_crystal_description        prism
_exptl_crystal_colour             black
_exptl_crystal_size_max           0.12
_exptl_crystal_size_mid           0.12
_exptl_crystal_size_min           0.10
_exptl_crystal_density_meas       ? 
_exptl_crystal_density_method     ?              
_exptl_crystal_density_diffrn     1.648          
_exptl_crystal_F_000              2214
_exptl_transmission_factor_min    ?                                             
_exptl_transmission_factor_max    ?                                             
_exptl_absorpt_coefficient_mu     4.118
_shelx_estimated_absorpt_T_min    ? 
_shelx_estimated_absorpt_T_max    ? 
_exptl_absorpt_correction_type    gaussian
_exptl_absorpt_process_details    'SADABS (Bruker AXS, 2008)' 
_exptl_absorpt_correction_T_min   0.57837
_exptl_absorpt_correction_T_max   0.78038
 
_exptl_special_details
;
 ?
;
 
_diffrn_ambient_temperature       100(2)
_diffrn_radiation_wavelength      0.71073
_diffrn_radiation_type            MoK\a
_diffrn_radiation_source          '0.2 x 2mm^2^ focus rotating anode'
_diffrn_radiation_monochromator   graphite
_diffrn_measurement_device_type   'Bruker AXS Enraf-Nonius KappaCCD'
_diffrn_measurement_method        'CCD \f- and \w-scans'
_diffrn_detector_area_resol_mean  18.02
_diffrn_reflns_number             39211
_diffrn_reflns_av_unetI/netI      0.0165
_diffrn_reflns_av_R_equivalents   0.0552
_diffrn_reflns_limit_h_min        -28
_diffrn_reflns_limit_h_max        28
_diffrn_reflns_limit_k_min        -28
_diffrn_reflns_limit_k_max        28
_diffrn_reflns_limit_l_min        -23
_diffrn_reflns_limit_l_max        23
_diffrn_reflns_theta_min          3.649
_diffrn_reflns_theta_max          33.108
_diffrn_reflns_theta_full         25.242
_diffrn_measured_fraction_theta_max   0.999
_diffrn_measured_fraction_theta_full  0.997
_diffrn_reflns_Laue_measured_fraction_max    0.999
_diffrn_reflns_Laue_measured_fraction_full   0.997
_diffrn_reflns_point_group_measured_fraction_max   0.999
_diffrn_reflns_point_group_measured_fraction_full  0.997
_reflns_number_total              1897
_reflns_number_gt                 1443
_reflns_threshold_expression      'I > 2\s(I)'
_reflns_Friedel_coverage          0.000
_reflns_Friedel_fraction_max      .
_reflns_Friedel_fraction_full     .
 
_reflns_special_details
;
 Reflections were merged by SHELXL according to the crystal
 class for the calculation of statistics and refinement.
 
 _reflns_Friedel_fraction is defined as the number of unique
 Friedel pairs measured divided by the number that would be
 possible theoretically, ignoring centric projections and
 systematic absences.
;
 
_computing_data_collection        'DATCOL (Bruker AXS, 2006)'
_computing_cell_refinement        'DENZO (Bruker AXS, 2006)'
_computing_data_reduction         'DENZO (Bruker AXS, 2006)'
_computing_structure_solution     'SHELXS-2013 (Sheldrick, 2013)'
_computing_structure_refinement   'SHELXL-2013 (Sheldrick, 2013)'
_computing_molecular_graphics     ?
_computing_publication_material   ?
 
_refine_special_details
;
 Refinement of F^2^ against ALL reflections.  The weighted R-factor wR and
 goodness of fit S are based on F^2^, conventional R-factors R are based
 on F, with F set to zero for negative F^2^. The threshold expression of
 F^2^ > 2sigma(F^2^) is used only for calculating R-factors(gt) etc. and is
 not relevant to the choice of reflections for refinement.  R-factors based
 on F^2^ are statistically about twice as large as those based on F, and R-
 factors based on ALL data will be even larger.

 The minimum and maximum estimated transmissions from the multi-scan
 scaling are 0.5049 and 0.8555 (SADABS).
;
_refine_ls_structure_factor_coef  Fsqd
_refine_ls_matrix_type            full
_refine_ls_weighting_scheme       calc
_refine_ls_weighting_details
;
 w=1/[\s^2^(Fo^2^)+(0.0405P)^2^+10.6483P]
 where P=(Fo^2^+2Fc^2^)/3
;
_atom_sites_solution_primary      ?
_atom_sites_solution_secondary    ?
_atom_sites_solution_hydrogens    geom
_refine_ls_hydrogen_treatment     constr
_refine_ls_extinction_method      none
_refine_ls_extinction_coef        .
_refine_ls_number_reflns          1897
_refine_ls_number_parameters      67
_refine_ls_number_restraints      0
_refine_ls_R_factor_all           0.0405
_refine_ls_R_factor_gt            0.0287
_refine_ls_wR_factor_ref          0.0812
_refine_ls_wR_factor_gt           0.0691
_refine_ls_goodness_of_fit_ref    1.090
_refine_ls_restrained_S_all       1.090
_refine_ls_shift/su_max           0.000
_refine_ls_shift/su_mean          0.000
 
loop_
 _atom_site_label
 _atom_site_type_symbol
 _atom_site_fract_x
 _atom_site_fract_y
 _atom_site_fract_z
 _atom_site_U_iso_or_equiv
 _atom_site_adp_type
 _atom_site_occupancy
 _atom_site_site_symmetry_order  
 _atom_site_calc_flag
 _atom_site_refinement_flags_posn
 _atom_site_refinement_flags_adp
 _atom_site_refinement_flags_occupancy
 _atom_site_disorder_assembly
 _atom_site_disorder_group
Re Re 0.0000 0.0000 0.2500 0.03375(8) Uani 1 6 d S T P . .
N1 N 0.04465(13) 0.11086(15) 0.31920(15) 0.0358(4) Uani 1 1 d . . . . .
C2 C 0.09354(17) 0.13179(16) 0.39268(16) 0.0385(5) Uani 1 1 d . . . . .
H2 H 0.1105 0.0935 0.4128 0.046 Uiso 1 1 calc R U . . .
C3 C 0.11931(18) 0.20478(19) 0.43867(17) 0.0390(5) Uani 1 1 d . . . . .
H3 H 0.1536 0.2160 0.4888 0.047 Uiso 1 1 calc R U . . .
C4 C 0.09496(16) 0.26346(16) 0.41171(14) 0.0368(5) Uani 1 1 d . . . . .
C5 C 0.04740(16) 0.24429(15) 0.33667(15) 0.0370(5) Uani 1 1 d . . . . .
H5 H 0.0302 0.2824 0.3162 0.044 Uiso 1 1 calc R U . . .
C6 C 0.02377(15) 0.16980(15) 0.28987(15) 0.0350(4) Uani 1 1 d . . . . .
C13 C 0.11980(19) 0.34232(19) 0.46305(16) 0.0454(6) Uani 1 1 d . . . . .
H13A H 0.1271 0.3875 0.4236 0.068 Uiso 1 1 calc R U . . .
H13B H 0.1729 0.3594 0.4936 0.068 Uiso 1 1 calc R U . . .
H13C H 0.0756 0.3315 0.5055 0.068 Uiso 1 1 calc R U . . .
 
loop_
 _atom_site_aniso_label
 _atom_site_aniso_U_11
 _atom_site_aniso_U_22
 _atom_site_aniso_U_33
 _atom_site_aniso_U_23
 _atom_site_aniso_U_13
 _atom_site_aniso_U_12
Re 0.03005(9) 0.03005(9) 0.04115(13) 0.000 0.000 0.01502(5)
N1 0.0346(10) 0.0315(10) 0.0399(10) -0.0001(8) -0.0049(7) 0.0154(8)
C2 0.0350(12) 0.0397(12) 0.0403(12) 0.0038(9) -0.0050(9) 0.0182(11)
C3 0.0373(11) 0.0433(14) 0.0334(11) 0.0037(10) -0.0037(9) 0.0180(11)
C4 0.0390(12) 0.0409(12) 0.0292(10) 0.0001(8) -0.0005(8) 0.0189(10)
C5 0.0418(12) 0.0377(11) 0.0336(10) -0.0024(9) -0.0043(9) 0.0215(10)
C6 0.0349(11) 0.0332(10) 0.0364(10) -0.0011(8) -0.0051(8) 0.0167(9)
C13 0.0550(16) 0.0543(15) 0.0308(10) -0.0086(10) -0.0051(10) 0.0301(13)
 
_geom_special_details
;
 All esds (except the esd in the dihedral angle between two l.s. planes)
 are estimated using the full covariance matrix.  The cell esds are taken
 into account individually in the estimation of esds in distances, angles
 and torsion angles; correlations between esds in cell parameters are only
 used when they are defined by crystal symmetry.  An approximate (isotropic)
 treatment of cell esds is used for estimating esds involving l.s. planes.
;
 
loop_
 _geom_bond_atom_site_label_1
 _geom_bond_atom_site_label_2
 _geom_bond_distance
 _geom_bond_site_symmetry_2
 _geom_bond_publ_flag
Re N1 2.064(2) 3 ?
Re N1 2.064(2) 6 ?
Re N1 2.064(2) . ?
Re N1 2.064(2) 5 ?
Re N1 2.064(2) 2 ?
Re N1 2.064(2) 4 ?
N1 C2 1.372(3) . ?
N1 C6 1.388(3) . ?
C2 C3 1.370(4) . ?
C3 C4 1.416(4) . ?
C4 C5 1.381(3) . ?
C4 C13 1.503(4) . ?
C5 C6 1.405(3) . ?
C6 C6 1.440(4) 6 ?
 
loop_
 _geom_angle_atom_site_label_1
 _geom_angle_atom_site_label_2
 _geom_angle_atom_site_label_3
 _geom_angle
 _geom_angle_site_symmetry_1
 _geom_angle_site_symmetry_3
 _geom_angle_publ_flag
N1 Re N1 169.03(11) 3 6 ?
N1 Re N1 95.81(9) 3 . ?
N1 Re N1 76.52(12) 6 . ?
N1 Re N1 92.80(12) 3 5 ?
N1 Re N1 95.81(9) 6 5 ?
N1 Re N1 169.03(11) . 5 ?
N1 Re N1 95.81(9) 3 2 ?
N1 Re N1 92.80(12) 6 2 ?
N1 Re N1 95.81(9) . 2 ?
N1 Re N1 76.53(12) 5 2 ?
N1 Re N1 76.52(12) 3 4 ?
N1 Re N1 95.81(9) 6 4 ?
N1 Re N1 92.80(12) . 4 ?
N1 Re N1 95.81(9) 5 4 ?
N1 Re N1 169.03(11) 2 4 ?
C2 N1 C6 116.4(2) . . ?
C2 N1 Re 125.58(18) . . ?
C6 N1 Re 117.98(16) . . ?
C3 C2 N1 123.8(2) . . ?
C2 C3 C4 120.2(2) . . ?
C5 C4 C3 116.7(2) . . ?
C5 C4 C13 122.2(2) . . ?
C3 C4 C13 121.1(2) . . ?
C4 C5 C6 121.6(2) . . ?
N1 C6 C5 121.1(2) . . ?
N1 C6 C6 113.69(13) . 6 ?
C5 C6 C6 125.17(14) . 6 ?
 
_refine_diff_density_max    2.044
_refine_diff_density_min   -1.617
_refine_diff_density_rms    0.101

_shelxl_version_number 2013-2

_shelx_res_file
;
TITL [(me2bpy)3Re]
TITL 8625  Mei Wang in R-3c No.167 ; WGT-WM-057-01
CELL 0.71073  18.3091  18.3091  15.383  90.000  90.000 120.000
ZERR    6.00   0.0010   0.0010   0.002   0.000   0.000   0.000
LATT  3
SYMM -Y, X-Y, Z
SYMM -X+Y, -X, Z
SYMM Y, X, 0.5-Z
SYMM X-Y, -Y, 0.5-Z
SYMM -X, -X+Y, 0.5-Z
SFAC C H N RE
UNIT 216 216 36 6

OMIT -3 67
TEMP -173

L.S. 8

ACTA

BOND
FMAP 2
PLAN 20

WGHT    0.040500   10.648301
FVAR       0.04048
RE    4    0.000000    0.000000    0.250000    10.16667    0.03005    0.03005 =
         0.04115    0.00000    0.00000    0.01502
N1    3    0.044652    0.110858    0.319195    11.00000    0.03457    0.03151 =
         0.03988   -0.00011   -0.00494    0.01541
C2    1    0.093537    0.131794    0.392676    11.00000    0.03501    0.03966 =
         0.04026    0.00378   -0.00504    0.01817
AFIX  43
H2    2    0.110501    0.093484    0.412836    11.00000   -1.20000
AFIX   0
C3    1    0.119308    0.204775    0.438668    11.00000    0.03728    0.04330 =
         0.03340    0.00371   -0.00368    0.01799
AFIX  43
H3    2    0.153622    0.216020    0.488801    11.00000   -1.20000
AFIX   0
C4    1    0.094962    0.263457    0.411714    11.00000    0.03899    0.04090 =
         0.02924    0.00011   -0.00047    0.01894
C5    1    0.047396    0.244287    0.336673    11.00000    0.04182    0.03772 =
         0.03355   -0.00236   -0.00433    0.02151
AFIX  43
H5    2    0.030247    0.282363    0.316216    11.00000   -1.20000
AFIX   0
C6    1    0.023767    0.169802    0.289868    11.00000    0.03494    0.03324 =
         0.03639   -0.00111   -0.00511    0.01673
C13   1    0.119797    0.342320    0.463052    11.00000    0.05500    0.05427 =
         0.03080   -0.00858   -0.00505    0.03011
AFIX 137
H13A  2    0.127125    0.387506    0.423566    11.00000   -1.50000
H13B  2    0.172903    0.359359    0.493613    11.00000   -1.50000
H13C  2    0.075558    0.331518    0.505451    11.00000   -1.50000
AFIX   0
HKLF 4

REM  8625  Mei Wang in R-3c No.167 ; WGT-WM-057-01
REM R1 =  0.0287 for    1443 Fo > 4sig(Fo)  and  0.0405 for all    1897 data
REM     67 parameters refined using      0 restraints

END

WGHT      0.0400     10.6479

REM Highest difference peak  2.044,  deepest hole -1.617,  1-sigma level  0.101
Q1    1  -0.0263 -0.0453  0.2629  11.00000  0.05    2.04
Q2    1   0.0376  0.0765  0.2906  11.00000  0.05    0.55
Q3    1   0.0907  0.2156  0.4365  11.00000  0.05    0.47
Q4    1   0.0960  0.1661  0.4145  11.00000  0.05    0.37
Q5    1   0.0786  0.2635  0.3721  11.00000  0.05    0.37
Q6    1   0.0548  0.1522  0.3062  11.00000  0.05    0.30
Q7    1   0.1649  0.2644  0.4055  11.00000  0.05    0.27
Q8    1   0.0000  0.1593  0.2500  10.50000  0.05    0.25
Q9    1   0.0808  0.3597  0.4710  11.00000  0.05    0.25
Q10   1   0.0430  0.2068  0.3048  11.00000  0.05    0.25
Q11   1  -0.0095  0.0622  0.2970  11.00000  0.05    0.24
Q12   1   0.1370  0.4243  0.3331  11.00000  0.05    0.23
Q13   1   0.0928  0.2946  0.4280  11.00000  0.05    0.21
Q14   1   0.0733  0.0783  0.4305  11.00000  0.05    0.18
Q15   1   0.0825  0.3712  0.4270  11.00000  0.05    0.17
Q16   1   0.0600  0.0962  0.2380  11.00000  0.05    0.17
Q17   1   0.0255  0.1262  0.3915  11.00000  0.05    0.16
Q18   1   0.2235  0.3416  0.4722  11.00000  0.05    0.16
Q19   1   0.0566  0.3028  0.2850  11.00000  0.05    0.16
Q20   1   0.0272  0.1677  0.4190  11.00000  0.05    0.16
;
_shelx_res_checksum   30370

#===END

 
data_4a
 
_audit_creation_method            SHELXL-2013
_audit_creation_date              2015-10-06
_audit_block_code                 WGT-WM-094-01
_chemical_name_systematic
;
 ?
;
_chemical_name_common             ?
_chemical_melting_point           ?
_chemical_formula_moiety           
 'C36 H36 N6 Re, 2(C F3 O3 S), 2(C H4 O)' 
_chemical_formula_sum
 'C40 H44 F6 N6 O8 Re S2' 
_chemical_formula_weight          1101.13

loop_
 _atom_type_symbol
 _atom_type_description
 _atom_type_scat_dispersion_real
 _atom_type_scat_dispersion_imag
 _atom_type_scat_source
 'C'  'C'   0.0033   0.0016
 'International Tables Vol C Tables 4.2.6.8 and 6.1.1.4'
 'H'  'H'   0.0000   0.0000
 'International Tables Vol C Tables 4.2.6.8 and 6.1.1.4'
 'N'  'N'   0.0061   0.0033
 'International Tables Vol C Tables 4.2.6.8 and 6.1.1.4'
 'O'  'O'   0.0106   0.0060
 'International Tables Vol C Tables 4.2.6.8 and 6.1.1.4'
 'F'  'F'   0.0171   0.0103
 'International Tables Vol C Tables 4.2.6.8 and 6.1.1.4'
 'S'  'S'   0.1246   0.1234
 'International Tables Vol C Tables 4.2.6.8 and 6.1.1.4'
 'Re'  'Re'  -1.0185   7.2310
 'International Tables Vol C Tables 4.2.6.8 and 6.1.1.4'
 
_space_group_crystal_system       monoclinic
_space_group_IT_number            14
_space_group_name_H-M_alt         'P 21/c'
_space_group_name_Hall            '-P 2ybc'
 
_shelx_space_group_comment
;
The symmetry employed for this shelxl refinement is uniquely defined
by the following loop, which should always be used as a source of
symmetry information in preference to the above space-group names.
They are only intended as comments.
;
 
loop_
 _space_group_symop_operation_xyz
 'x, y, z'
 '-x, y+1/2, -z+1/2'
 '-x, -y, -z'
 'x, -y-1/2, z-1/2'
 
_cell_length_a                    13.180(2)
_cell_length_b                    19.315(3)
_cell_length_c                    17.588(2)
_cell_angle_alpha                 90
_cell_angle_beta                  95.874(2)
_cell_angle_gamma                 90
_cell_volume                      4453.9(11)
_cell_formula_units_Z             4
_cell_measurement_temperature     100(2)
_cell_measurement_reflns_used     9583
_cell_measurement_theta_min       2.8013
_cell_measurement_theta_max       31.4806

loop_
 _exptl_crystal_face_index_h
 _exptl_crystal_face_index_k
 _exptl_crystal_face_index_l
 _exptl_crystal_face_perp_dist
    1.00    0.00    2.00    0.0600
   -1.00    0.00   -2.00    0.0600
    1.00   -1.00   -1.00    0.0750
   -2.00    0.00    1.00    0.0750
    0.00    2.00    1.00    0.0900
    1.00    2.00    1.00    0.0800
   -1.00   -1.00    0.00    0.0400

_exptl_crystal_description        prism
_exptl_crystal_colour             black
_exptl_crystal_density_meas       ? 
_exptl_crystal_density_method     ?              
_exptl_crystal_density_diffrn     1.642          
_exptl_crystal_F_000              2204
_exptl_transmission_factor_min    ?                                             
_exptl_transmission_factor_max    ?                                             
_exptl_crystal_size_max           0.150
_exptl_crystal_size_mid           0.120
_exptl_crystal_size_min           0.120
_exptl_absorpt_coefficient_mu     2.904
_shelx_estimated_absorpt_T_min    0.670
_shelx_estimated_absorpt_T_max    0.722
_exptl_absorpt_correction_type    gaussian
_exptl_absorpt_process_details    'SADABS (Bruker AXS, 2012)' 
_exptl_absorpt_correction_T_min   0.62653
_exptl_absorpt_correction_T_max   0.78428
 
_exptl_special_details
;
 ?
;
 
_diffrn_ambient_temperature       100(2)
_diffrn_radiation_wavelength      0.71073
_diffrn_radiation_type            MoK\a
_diffrn_radiation_source          '1\mS'
_diffrn_radiation_monochromator   'Incoatec Helios mirrors'
_diffrn_measurement_device_type   'Bruker-AXS Kappa Mach3 APEX-II'
_diffrn_measurement_method        'CCD \f- and \w-scans'
_diffrn_detector_area_resol_mean  66.67
_diffrn_reflns_number             134879
_diffrn_reflns_av_unetI/netI      0.0182
_diffrn_reflns_av_R_equivalents   0.0335
_diffrn_reflns_limit_h_min        -19
_diffrn_reflns_limit_h_max        19
_diffrn_reflns_limit_k_min        -28
_diffrn_reflns_limit_k_max        28
_diffrn_reflns_limit_l_min        -25
_diffrn_reflns_limit_l_max        25
_diffrn_reflns_theta_min          2.556
_diffrn_reflns_theta_max          31.585
_diffrn_reflns_theta_full         25.242
_diffrn_measured_fraction_theta_max   0.997
_diffrn_measured_fraction_theta_full  0.998
_diffrn_reflns_Laue_measured_fraction_max    0.997
_diffrn_reflns_Laue_measured_fraction_full   0.998
_diffrn_reflns_point_group_measured_fraction_max   0.997
_diffrn_reflns_point_group_measured_fraction_full  0.998
_reflns_number_total              14887
_reflns_number_gt                 12608
_reflns_threshold_expression      'I > 2\s(I)'
_reflns_Friedel_coverage          0.000
_reflns_Friedel_fraction_max      .
_reflns_Friedel_fraction_full     .
 
_reflns_special_details
;
 Reflections were merged by SHELXL according to the crystal
 class for the calculation of statistics and refinement.
 
 Structure factors included contributions from the .fab file.
 
 _reflns_Friedel_fraction is defined as the number of unique
 Friedel pairs measured divided by the number that would be
 possible theoretically, ignoring centric projections and
 systematic absences.
;
 
_computing_data_collection        'APEX2 (Bruker AXS, 2005-2013)'
_computing_cell_refinement        'SAINT software (Bruker AXS, 2004)'
_computing_data_reduction         'SAINT software (Bruker AXS, 2004)'
_computing_structure_solution     'SHELXS (G. M. Sheldrick, 2013)'
_computing_structure_refinement   'SHELXL (G. M. Sheldrick, 2013)'
_computing_molecular_graphics     ?
_computing_publication_material   ?
 
_refine_special_details
;
 ?
;
_refine_ls_structure_factor_coef  Fsqd
_refine_ls_matrix_type            full
_refine_ls_weighting_scheme       calc
_refine_ls_weighting_details
;
 w=1/[\s^2^(Fo^2^)+(0.0681P)^2^+16.1178P]
 where P=(Fo^2^+2Fc^2^)/3
;
_atom_sites_solution_primary      ?
_atom_sites_solution_secondary    ?
_atom_sites_solution_hydrogens    geom
_refine_ls_hydrogen_treatment     constr
_refine_ls_extinction_method      none
_refine_ls_extinction_coef        .
_refine_ls_number_reflns          14887
_refine_ls_number_parameters      588
_refine_ls_number_restraints      486
_refine_ls_R_factor_all           0.0526
_refine_ls_R_factor_gt            0.0418
_refine_ls_wR_factor_ref          0.1311
_refine_ls_wR_factor_gt           0.1189
_refine_ls_goodness_of_fit_ref    1.074
_refine_ls_restrained_S_all       1.144
_refine_ls_shift/su_max           0.003
_refine_ls_shift/su_mean          0.000
 
loop_
 _atom_site_label
 _atom_site_type_symbol
 _atom_site_fract_x
 _atom_site_fract_y
 _atom_site_fract_z
 _atom_site_U_iso_or_equiv
 _atom_site_adp_type
 _atom_site_occupancy
 _atom_site_site_symmetry_order  
 _atom_site_calc_flag
 _atom_site_refinement_flags_posn
 _atom_site_refinement_flags_adp
 _atom_site_refinement_flags_occupancy
 _atom_site_disorder_assembly
 _atom_site_disorder_group
Re1 Re 0.72706(2) 0.99197(2) 0.76866(2) 0.02188(5) Uani 1 1 d . . . . .
N1 N 0.8270(2) 0.97033(18) 0.68868(18) 0.0257(6) Uani 1 1 d . . . . .
C2 C 0.8329(4) 0.9079(2) 0.6524(2) 0.0349(8) Uani 1 1 d . . . . .
H2 H 0.7821 0.8741 0.6586 0.042 Uiso 1 1 calc R U . . .
C3 C 0.9094(4) 0.8920(3) 0.6075(3) 0.0434(11) Uani 1 1 d . . . . .
H3 H 0.9097 0.8482 0.5830 0.052 Uiso 1 1 calc R U . . .
C4 C 0.9858(4) 0.9394(3) 0.5977(3) 0.0444(11) Uani 1 1 d . . . . .
C5 C 0.9802(4) 1.0031(3) 0.6333(3) 0.0383(10) Uani 1 1 d . . . . .
H5 H 1.0309 1.0371 0.6275 0.046 Uiso 1 1 calc R U . . .
C6 C 0.9007(3) 1.0177(2) 0.6775(2) 0.0278(7) Uani 1 1 d . . . . .
C7 C 0.8871(3) 1.0836(2) 0.7167(2) 0.0273(7) Uani 1 1 d . . . . .
C8 C 0.9480(4) 1.1418(2) 0.7107(3) 0.0386(9) Uani 1 1 d . . . . .
H8 H 1.0036 1.1399 0.6804 0.046 Uiso 1 1 calc R U . . .
C9 C 0.9285(4) 1.2020(3) 0.7483(3) 0.0453(11) Uani 1 1 d . . . . .
C10 C 0.8474(4) 1.2019(2) 0.7930(3) 0.0372(9) Uani 1 1 d . . . . .
H10 H 0.8314 1.2427 0.8195 0.045 Uiso 1 1 calc R U . . .
C11 C 0.7903(3) 1.14294(19) 0.7989(2) 0.0274(7) Uani 1 1 d . . . . .
H11 H 0.7362 1.1437 0.8307 0.033 Uiso 1 1 calc R U . . .
N12 N 0.8082(2) 1.08398(15) 0.76111(18) 0.0233(5) Uani 1 1 d . . . . .
C13 C 1.0725(5) 0.9214(4) 0.5520(4) 0.0636(18) Uani 1 1 d . . . . .
H13A H 1.1161 0.9621 0.5483 0.095 Uiso 1 1 calc R U . . .
H13B H 1.0453 0.9067 0.5006 0.095 Uiso 1 1 calc R U . . .
H13C H 1.1127 0.8837 0.5773 0.095 Uiso 1 1 calc R U . . .
C14 C 0.9927(6) 1.2664(4) 0.7426(5) 0.080(2) Uani 1 1 d . . . . .
H14A H 1.0069 1.2731 0.6894 0.120 Uiso 1 1 calc R U . . .
H14B H 1.0572 1.2612 0.7752 0.120 Uiso 1 1 calc R U . . .
H14C H 0.9558 1.3067 0.7594 0.120 Uiso 1 1 calc R U . . .
N21 N 0.8268(2) 0.96504(16) 0.86412(18) 0.0252(6) Uani 1 1 d . . . . .
C22 C 0.9179(3) 0.9331(2) 0.8618(3) 0.0332(8) Uani 1 1 d . . . . .
H22 H 0.9434 0.9266 0.8137 0.040 Uiso 1 1 calc R U . . .
C23 C 0.9749(4) 0.9096(2) 0.9269(3) 0.0419(11) Uani 1 1 d . . . . .
H23 H 1.0383 0.8872 0.9230 0.050 Uiso 1 1 calc R U . . .
C24 C 0.9394(4) 0.9187(3) 0.9982(3) 0.0455(12) Uani 1 1 d . . . . .
C25 C 0.8484(4) 0.9537(2) 1.0011(3) 0.0398(10) Uani 1 1 d . . . . .
H25 H 0.8233 0.9621 1.0490 0.048 Uiso 1 1 calc R U . . .
C26 C 0.7936(3) 0.9768(2) 0.9341(2) 0.0294(7) Uani 1 1 d . . . . .
C27 C 0.6961(3) 1.0137(2) 0.9319(2) 0.0289(7) Uani 1 1 d . . . . .
C28 C 0.6546(4) 1.0393(2) 0.9955(2) 0.0363(9) Uani 1 1 d . . . . .
H28 H 0.6895 1.0324 1.0450 0.044 Uiso 1 1 calc R U . . .
C29 C 0.5626(4) 1.0749(2) 0.9878(3) 0.0392(10) Uani 1 1 d . . . . .
C30 C 0.5132(4) 1.0805(2) 0.9149(3) 0.0394(10) Uani 1 1 d . . . . .
H30 H 0.4487 1.1028 0.9074 0.047 Uiso 1 1 calc R U . . .
C31 C 0.5562(3) 1.0542(2) 0.8529(3) 0.0324(8) Uani 1 1 d . . . . .
H31 H 0.5199 1.0584 0.8036 0.039 Uiso 1 1 calc R U . . .
N32 N 0.6487(2) 1.02254(16) 0.85965(18) 0.0244(6) Uani 1 1 d . . . . .
C33 C 0.9981(5) 0.8900(3) 1.0695(3) 0.0615(17) Uani 1 1 d . . . . .
H33A H 0.9812 0.9165 1.1141 0.092 Uiso 1 1 calc R U . . .
H33B H 1.0714 0.8935 1.0651 0.092 Uiso 1 1 calc R U . . .
H33C H 0.9797 0.8413 1.0758 0.092 Uiso 1 1 calc R U . . .
C34 C 0.5199(5) 1.1073(3) 1.0553(3) 0.0529(14) Uani 1 1 d . . . . .
H34A H 0.5452 1.1548 1.0619 0.079 Uiso 1 1 calc R U . . .
H34B H 0.5414 1.0804 1.1014 0.079 Uiso 1 1 calc R U . . .
H34C H 0.4453 1.1078 1.0468 0.079 Uiso 1 1 calc R U . . .
N41 N 0.6429(2) 0.90013(16) 0.76659(18) 0.0253(6) Uani 1 1 d . . . . .
C42 C 0.6674(3) 0.8442(2) 0.8117(3) 0.0338(8) Uani 1 1 d . . . . .
H42 H 0.7295 0.8448 0.8442 0.041 Uiso 1 1 calc R U . . .
C43 C 0.6059(4) 0.7870(2) 0.8120(3) 0.0388(10) Uani 1 1 d . . . . .
H43 H 0.6270 0.7481 0.8428 0.047 Uiso 1 1 calc R U . . .
C44 C 0.5126(4) 0.7857(2) 0.7671(3) 0.0376(9) Uani 1 1 d . . . . .
C45 C 0.4881(3) 0.8422(2) 0.7207(2) 0.0326(8) Uani 1 1 d . . . . .
H45 H 0.4256 0.8427 0.6887 0.039 Uiso 1 1 calc R U . . .
C46 C 0.5538(3) 0.89845(19) 0.7204(2) 0.0247(6) Uani 1 1 d . . . . .
C47 C 0.5345(3) 0.95977(18) 0.6720(2) 0.0232(6) Uani 1 1 d . . . . .
C48 C 0.4494(3) 0.9677(2) 0.6192(2) 0.0271(7) Uani 1 1 d . . . . .
H48 H 0.3997 0.9320 0.6130 0.033 Uiso 1 1 calc R U . . .
C49 C 0.4366(3) 1.0278(2) 0.5755(2) 0.0279(7) Uani 1 1 d . . . . .
C50 C 0.5142(3) 1.0771(2) 0.5850(2) 0.0284(7) Uani 1 1 d . . . . .
H50 H 0.5093 1.1182 0.5553 0.034 Uiso 1 1 calc R U . . .
C51 C 0.5977(3) 1.06637(18) 0.6372(2) 0.0252(6) Uani 1 1 d . . . . .
H51 H 0.6500 1.1004 0.6419 0.030 Uiso 1 1 calc R U . . .
N52 N 0.6087(2) 1.00944(15) 0.68226(18) 0.0216(5) Uani 1 1 d . . . . .
C53 C 0.4429(5) 0.7249(3) 0.7696(4) 0.0610(17) Uani 1 1 d . . . . .
H53A H 0.4818 0.6821 0.7652 0.092 Uiso 1 1 calc R U . . .
H53B H 0.3888 0.7278 0.7272 0.092 Uiso 1 1 calc R U . . .
H53C H 0.4125 0.7249 0.8182 0.092 Uiso 1 1 calc R U . . .
C54 C 0.3421(3) 1.0392(3) 0.5215(3) 0.0379(9) Uani 1 1 d . . . . .
H54A H 0.3061 0.9951 0.5123 0.057 Uiso 1 1 calc R U . . .
H54B H 0.3612 1.0576 0.4730 0.057 Uiso 1 1 calc R U . . .
H54C H 0.2974 1.0723 0.5441 0.057 Uiso 1 1 calc R U . . .
S60 S 0.2582(4) 1.0878(3) 0.7485(3) 0.0785(10) Uani 0.660(8) 1 d D . P A 1
C61 C 0.2429(8) 0.9984(5) 0.7606(5) 0.074(3) Uani 0.660(8) 1 d D U P A 1
F62 F 0.1557(11) 0.9814(6) 0.7888(9) 0.137(4) Uani 0.660(8) 1 d D U P A 1
F63 F 0.2426(9) 0.9622(5) 0.6958(6) 0.121(4) Uani 0.660(8) 1 d D U P A 1
F64 F 0.3168(13) 0.9707(6) 0.8087(8) 0.168(4) Uani 0.660(8) 1 d D U P A 1
O65 O 0.1914(8) 1.0993(6) 0.6784(5) 0.140(5) Uani 0.660(8) 1 d D U P A 1
O66 O 0.3626(6) 1.0954(7) 0.7365(6) 0.098(2) Uani 0.660(8) 1 d D U P A 1
O67 O 0.2192(5) 1.1141(4) 0.8128(4) 0.0694(19) Uani 0.660(8) 1 d D U P A 1
S70 S 0.67713(13) 1.27204(8) 0.96706(10) 0.0398(3) Uani 0.766(3) 1 d D . P B 1
C71 C 0.7795(6) 1.2654(4) 1.0368(4) 0.087(3) Uani 0.766(3) 1 d D U P B 1
F72 F 0.8689(4) 1.2544(5) 1.0096(5) 0.112(3) Uani 0.766(3) 1 d D U P B 1
F73 F 0.7695(9) 1.2159(5) 1.0879(5) 0.184(4) Uani 0.766(3) 1 d D U P B 1
F74 F 0.7937(6) 1.3244(4) 1.0778(4) 0.150(3) Uani 0.766(3) 1 d D U P B 1
O75 O 0.6758(5) 1.2061(3) 0.9298(4) 0.091(2) Uani 0.766(3) 1 d D U P B 1
O76 O 0.7045(5) 1.3282(3) 0.9216(4) 0.093(3) Uani 0.766(3) 1 d D U P B 1
O77 O 0.5918(5) 1.2817(4) 1.0093(5) 0.096(2) Uani 0.766(3) 1 d D U P B 1
S60' S 0.2641(9) 1.0974(7) 0.7671(6) 0.0785(10) Uani 0.340(8) 1 d D . P A 2
C61' C 0.2270(15) 1.0106(7) 0.7592(10) 0.074(3) Uani 0.340(8) 1 d D . P A 2
F62' F 0.137(2) 0.9985(12) 0.7859(19) 0.137(4) Uani 0.340(8) 1 d D . P A 2
F63' F 0.2172(19) 0.9879(10) 0.6870(12) 0.121(4) Uani 0.340(8) 1 d D . P A 2
F64' F 0.293(3) 0.9678(9) 0.7975(17) 0.168(4) Uani 0.340(8) 1 d D . P A 2
O65' O 0.1797(15) 1.1319(9) 0.7269(11) 0.140(5) Uani 0.340(8) 1 d D . P A 2
O66' O 0.3562(13) 1.0992(13) 0.7317(10) 0.098(2) Uani 0.340(8) 1 d D . P A 2
O67' O 0.2735(10) 1.1061(8) 0.8486(6) 0.0694(19) Uani 0.340(8) 1 d D . P A 2
S70' S 0.7002(4) 1.2994(3) 0.9870(3) 0.0398(3) Uani 0.234(3) 1 d D . P B 2
C71' C 0.7839(13) 1.2377(7) 1.0298(9) 0.087(3) Uani 0.234(3) 1 d D . P B 2
F72' F 0.8815(10) 1.2568(13) 1.033(2) 0.112(3) Uani 0.234(3) 1 d D . P B 2
F73' F 0.768(3) 1.2252(14) 1.1026(9) 0.184(4) Uani 0.234(3) 1 d D . P B 2
F74' F 0.7771(18) 1.1765(7) 0.9950(13) 0.150(3) Uani 0.234(3) 1 d D . P B 2
O75' O 0.7323(13) 1.3612(6) 1.0269(9) 0.091(2) Uani 0.234(3) 1 d D . P B 2
O76' O 0.7206(15) 1.2974(9) 0.9090(5) 0.093(3) Uani 0.234(3) 1 d D . P B 2
O77' O 0.6030(9) 1.2734(10) 1.0014(13) 0.096(2) Uani 0.234(3) 1 d D . P B 2
 
loop_
 _atom_site_aniso_label
 _atom_site_aniso_U_11
 _atom_site_aniso_U_22
 _atom_site_aniso_U_33
 _atom_site_aniso_U_23
 _atom_site_aniso_U_13
 _atom_site_aniso_U_12
Re1 0.02128(7) 0.01919(7) 0.02434(8) 0.00128(4) -0.00163(5) 0.00030(4)
N1 0.0221(13) 0.0323(15) 0.0217(13) 0.0059(11) -0.0036(10) 0.0016(12)
C2 0.042(2) 0.0282(18) 0.034(2) -0.0027(15) -0.0011(17) 0.0069(16)
C3 0.057(3) 0.041(2) 0.032(2) -0.0040(17) 0.004(2) 0.019(2)
C4 0.042(2) 0.057(3) 0.035(2) 0.005(2) 0.0087(18) 0.023(2)
C5 0.0275(19) 0.052(3) 0.037(2) 0.0068(18) 0.0075(17) 0.0055(17)
C6 0.0238(16) 0.0305(18) 0.0290(17) 0.0041(14) 0.0017(13) 0.0046(13)
C7 0.0248(16) 0.0262(16) 0.0304(18) 0.0023(13) 0.0000(13) -0.0015(13)
C8 0.034(2) 0.037(2) 0.045(2) 0.0042(18) 0.0041(18) -0.0103(17)
C9 0.050(3) 0.033(2) 0.050(3) 0.0026(19) -0.004(2) -0.020(2)
C10 0.049(2) 0.0215(17) 0.039(2) -0.0020(15) -0.0089(18) -0.0047(16)
C11 0.0308(17) 0.0202(15) 0.0291(17) -0.0005(12) -0.0071(14) 0.0013(13)
N12 0.0221(13) 0.0209(13) 0.0257(14) 0.0011(10) -0.0036(11) 0.0003(10)
C13 0.056(3) 0.084(5) 0.054(3) 0.000(3) 0.020(3) 0.028(3)
C14 0.098(6) 0.053(4) 0.091(5) -0.012(3) 0.022(4) -0.050(4)
N21 0.0249(14) 0.0212(13) 0.0278(14) 0.0025(11) -0.0054(11) -0.0005(11)
C22 0.0280(18) 0.0312(19) 0.038(2) 0.0016(15) -0.0068(15) 0.0020(14)
C23 0.037(2) 0.032(2) 0.052(3) 0.0042(18) -0.018(2) 0.0024(17)
C24 0.056(3) 0.034(2) 0.039(2) 0.0044(18) -0.026(2) -0.003(2)
C25 0.055(3) 0.033(2) 0.0285(19) 0.0040(15) -0.0119(18) -0.0028(19)
C26 0.0366(19) 0.0255(16) 0.0243(16) 0.0016(13) -0.0052(14) -0.0042(14)
C27 0.036(2) 0.0252(17) 0.0257(17) 0.0012(13) 0.0032(14) -0.0057(14)
C28 0.051(2) 0.032(2) 0.0272(18) -0.0013(15) 0.0090(17) -0.0102(18)
C29 0.052(3) 0.030(2) 0.040(2) -0.0043(16) 0.021(2) -0.0103(18)
C30 0.040(2) 0.030(2) 0.052(3) 0.0013(18) 0.022(2) 0.0034(16)
C31 0.0308(19) 0.0300(18) 0.037(2) 0.0039(15) 0.0071(15) 0.0029(14)
N32 0.0258(14) 0.0196(13) 0.0275(14) 0.0018(11) 0.0020(11) -0.0008(10)
C33 0.074(4) 0.051(3) 0.051(3) 0.010(2) -0.036(3) 0.002(3)
C34 0.070(4) 0.042(3) 0.052(3) -0.014(2) 0.036(3) -0.014(2)
N41 0.0270(14) 0.0207(13) 0.0270(14) 0.0032(11) -0.0026(11) -0.0034(11)
C42 0.035(2) 0.0255(17) 0.038(2) 0.0098(15) -0.0063(16) -0.0029(14)
C43 0.045(2) 0.0262(18) 0.044(2) 0.0114(16) -0.0021(19) -0.0086(16)
C44 0.039(2) 0.032(2) 0.042(2) 0.0058(17) 0.0002(18) -0.0157(17)
C45 0.0301(18) 0.0332(19) 0.0338(19) 0.0014(15) -0.0003(15) -0.0111(15)
C46 0.0260(16) 0.0236(15) 0.0240(15) 0.0003(12) 0.0003(12) -0.0034(12)
C47 0.0223(15) 0.0237(15) 0.0230(15) 0.0003(11) -0.0004(12) -0.0008(12)
C48 0.0242(16) 0.0310(18) 0.0258(16) -0.0028(13) 0.0005(13) -0.0006(13)
C49 0.0268(16) 0.0349(18) 0.0211(15) -0.0027(13) -0.0018(12) 0.0061(14)
C50 0.0326(18) 0.0265(17) 0.0253(16) 0.0019(13) -0.0006(14) 0.0062(14)
C51 0.0277(16) 0.0207(15) 0.0270(16) 0.0014(12) 0.0016(13) 0.0016(12)
N52 0.0225(13) 0.0189(12) 0.0231(13) -0.0005(10) 0.0009(10) 0.0007(10)
C53 0.061(3) 0.047(3) 0.072(4) 0.018(3) -0.010(3) -0.031(3)
C54 0.0311(19) 0.048(3) 0.032(2) -0.0020(17) -0.0073(16) 0.0110(18)
S60 0.0437(11) 0.125(3) 0.067(3) -0.027(2) 0.0054(17) -0.0028(13)
C61 0.071(4) 0.092(5) 0.057(4) 0.018(3) -0.010(3) -0.004(3)
F62 0.094(6) 0.206(8) 0.115(5) 0.002(5) 0.036(5) -0.017(6)
F63 0.103(6) 0.158(8) 0.104(5) -0.048(6) 0.020(4) 0.025(6)
F64 0.143(8) 0.213(7) 0.142(7) 0.030(6) -0.020(6) 0.010(6)
O65 0.115(6) 0.152(8) 0.144(8) 0.012(7) -0.025(7) -0.024(6)
O66 0.052(3) 0.159(6) 0.082(4) -0.013(4) 0.007(3) 0.021(3)
O67 0.047(3) 0.095(4) 0.071(4) 0.001(4) 0.031(3) 0.018(3)
S70 0.0413(8) 0.0302(8) 0.0471(8) -0.0020(6) 0.0007(6) 0.0012(6)
C71 0.086(4) 0.095(5) 0.081(4) 0.018(4) 0.004(4) -0.009(4)
F72 0.061(3) 0.096(4) 0.171(7) 0.024(4) -0.021(4) 0.015(3)
F73 0.185(7) 0.212(8) 0.146(6) 0.098(6) -0.021(5) -0.019(6)
F74 0.141(6) 0.199(7) 0.107(5) -0.067(5) -0.009(4) -0.054(6)
O75 0.109(5) 0.073(4) 0.101(5) -0.049(4) 0.058(4) -0.030(4)
O76 0.070(4) 0.074(5) 0.123(5) 0.065(4) -0.047(3) -0.025(4)
O77 0.066(3) 0.077(4) 0.152(5) -0.044(4) 0.052(4) -0.011(3)
S60' 0.0437(11) 0.125(3) 0.067(3) -0.027(2) 0.0054(17) -0.0028(13)
C61' 0.071(4) 0.092(5) 0.057(4) 0.018(3) -0.010(3) -0.004(3)
F62' 0.094(6) 0.206(8) 0.115(5) 0.002(5) 0.036(5) -0.017(6)
F63' 0.103(6) 0.158(8) 0.104(5) -0.048(6) 0.020(4) 0.025(6)
F64' 0.143(8) 0.213(7) 0.142(7) 0.030(6) -0.020(6) 0.010(6)
O65' 0.115(6) 0.152(8) 0.144(8) 0.012(7) -0.025(7) -0.024(6)
O66' 0.052(3) 0.159(6) 0.082(4) -0.013(4) 0.007(3) 0.021(3)
O67' 0.047(3) 0.095(4) 0.071(4) 0.001(4) 0.031(3) 0.018(3)
S70' 0.0413(8) 0.0302(8) 0.0471(8) -0.0020(6) 0.0007(6) 0.0012(6)
C71' 0.086(4) 0.095(5) 0.081(4) 0.018(4) 0.004(4) -0.009(4)
F72' 0.061(3) 0.096(4) 0.171(7) 0.024(4) -0.021(4) 0.015(3)
F73' 0.185(7) 0.212(8) 0.146(6) 0.098(6) -0.021(5) -0.019(6)
F74' 0.141(6) 0.199(7) 0.107(5) -0.067(5) -0.009(4) -0.054(6)
O75' 0.109(5) 0.073(4) 0.101(5) -0.049(4) 0.058(4) -0.030(4)
O76' 0.070(4) 0.074(5) 0.123(5) 0.065(4) -0.047(3) -0.025(4)
O77' 0.066(3) 0.077(4) 0.152(5) -0.044(4) 0.052(4) -0.011(3)
 
_geom_special_details
;
 All esds (except the esd in the dihedral angle between two l.s. planes)
 are estimated using the full covariance matrix.  The cell esds are taken
 into account individually in the estimation of esds in distances, angles
 and torsion angles; correlations between esds in cell parameters are only
 used when they are defined by crystal symmetry.  An approximate (isotropic)
 treatment of cell esds is used for estimating esds involving l.s. planes.
;
 
loop_
 _geom_bond_atom_site_label_1
 _geom_bond_atom_site_label_2
 _geom_bond_distance
 _geom_bond_site_symmetry_2
 _geom_bond_publ_flag
Re1 N1 2.065(3) . ?
Re1 N32 2.078(3) . ?
Re1 N12 2.085(3) . ?
Re1 N21 2.090(3) . ?
Re1 N41 2.090(3) . ?
Re1 N52 2.091(3) . ?
N1 C6 1.364(5) . ?
N1 C2 1.370(5) . ?
C2 C3 1.377(7) . ?
C3 C4 1.385(8) . ?
C4 C5 1.386(7) . ?
C4 C13 1.503(7) . ?
C5 C6 1.396(6) . ?
C6 C7 1.466(6) . ?
C7 N12 1.364(5) . ?
C7 C8 1.391(6) . ?
C8 C9 1.376(7) . ?
C9 C10 1.391(8) . ?
C9 C14 1.513(7) . ?
C10 C11 1.375(6) . ?
C11 N12 1.351(5) . ?
N21 C22 1.354(5) . ?
N21 C26 1.367(5) . ?
C22 C23 1.380(6) . ?
C23 C24 1.394(8) . ?
C24 C25 1.382(8) . ?
C24 C33 1.511(6) . ?
C25 C26 1.390(6) . ?
C26 C27 1.467(6) . ?
C27 N32 1.369(5) . ?
C27 C28 1.386(6) . ?
C28 C29 1.388(7) . ?
C29 C30 1.382(7) . ?
C29 C34 1.502(6) . ?
C30 C31 1.376(6) . ?
C31 N32 1.358(5) . ?
N41 C46 1.358(5) . ?
N41 C42 1.359(5) . ?
C42 C43 1.372(6) . ?
C43 C44 1.392(7) . ?
C44 C45 1.381(6) . ?
C44 C53 1.494(6) . ?
C45 C46 1.389(5) . ?
C46 C47 1.465(5) . ?
C47 N52 1.368(5) . ?
C47 C48 1.389(5) . ?
C48 C49 1.392(6) . ?
C49 C50 1.395(6) . ?
C49 C54 1.504(5) . ?
C50 C51 1.375(5) . ?
C51 N52 1.354(4) . ?
S60 O67 1.386(5) . ?
S60 O66 1.420(5) . ?
S60 O65 1.457(6) . ?
S60 C61 1.754(8) . ?
C61 F64 1.334(7) . ?
C61 F62 1.338(7) . ?
C61 F63 1.338(7) . ?
S70 O76 1.416(5) . ?
S70 O77 1.422(5) . ?
S70 O75 1.432(5) . ?
S70 C71 1.733(8) . ?
C71 F73 1.327(7) . ?
C71 F72 1.333(7) . ?
C71 F74 1.351(7) . ?
S60' O65' 1.421(7) . ?
S60' O66' 1.421(6) . ?
S60' O67' 1.435(7) . ?
S60' C61' 1.749(9) . ?
C61' F62' 1.334(7) . ?
C61' F64' 1.336(7) . ?
C61' F63' 1.337(8) . ?
S70' O77' 1.422(7) . ?
S70' O76' 1.425(7) . ?
S70' O75' 1.428(7) . ?
S70' C71' 1.742(10) . ?
C71' F74' 1.330(8) . ?
C71' F72' 1.334(8) . ?
C71' F73' 1.342(8) . ?
 
loop_
 _geom_angle_atom_site_label_1
 _geom_angle_atom_site_label_2
 _geom_angle_atom_site_label_3
 _geom_angle
 _geom_angle_site_symmetry_1
 _geom_angle_site_symmetry_3
 _geom_angle_publ_flag
N1 Re1 N32 169.78(13) . . ?
N1 Re1 N12 76.25(13) . . ?
N32 Re1 N12 96.06(12) . . ?
N1 Re1 N21 95.98(12) . . ?
N32 Re1 N21 76.91(13) . . ?
N12 Re1 N21 88.77(12) . . ?
N1 Re1 N41 100.99(13) . . ?
N32 Re1 N41 87.12(13) . . ?
N12 Re1 N41 175.34(12) . . ?
N21 Re1 N41 95.27(12) . . ?
N1 Re1 N52 91.02(12) . . ?
N32 Re1 N52 96.95(12) . . ?
N12 Re1 N52 99.53(11) . . ?
N21 Re1 N52 170.23(12) . . ?
N41 Re1 N52 76.66(12) . . ?
C6 N1 C2 116.6(4) . . ?
C6 N1 Re1 118.4(3) . . ?
C2 N1 Re1 124.5(3) . . ?
N1 C2 C3 122.9(5) . . ?
C2 C3 C4 120.6(5) . . ?
C3 C4 C5 117.2(4) . . ?
C3 C4 C13 121.1(5) . . ?
C5 C4 C13 121.7(6) . . ?
C4 C5 C6 120.7(5) . . ?
N1 C6 C5 122.0(4) . . ?
N1 C6 C7 113.0(3) . . ?
C5 C6 C7 124.9(4) . . ?
N12 C7 C8 121.2(4) . . ?
N12 C7 C6 114.3(3) . . ?
C8 C7 C6 124.5(4) . . ?
C9 C8 C7 120.6(4) . . ?
C8 C9 C10 117.6(4) . . ?
C8 C9 C14 122.0(5) . . ?
C10 C9 C14 120.4(5) . . ?
C11 C10 C9 120.1(4) . . ?
N12 C11 C10 122.5(4) . . ?
C11 N12 C7 117.9(3) . . ?
C11 N12 Re1 124.8(3) . . ?
C7 N12 Re1 117.3(2) . . ?
C22 N21 C26 118.0(3) . . ?
C22 N21 Re1 125.2(3) . . ?
C26 N21 Re1 116.7(3) . . ?
N21 C22 C23 122.3(4) . . ?
C22 C23 C24 120.0(5) . . ?
C25 C24 C23 117.8(4) . . ?
C25 C24 C33 121.4(5) . . ?
C23 C24 C33 120.7(5) . . ?
C24 C25 C26 120.2(5) . . ?
N21 C26 C25 121.6(4) . . ?
N21 C26 C27 114.6(3) . . ?
C25 C26 C27 123.8(4) . . ?
N32 C27 C28 121.6(4) . . ?
N32 C27 C26 113.6(3) . . ?
C28 C27 C26 124.7(4) . . ?
C27 C28 C29 120.7(4) . . ?
C30 C29 C28 117.0(4) . . ?
C30 C29 C34 121.5(5) . . ?
C28 C29 C34 121.5(5) . . ?
C31 C30 C29 120.9(4) . . ?
N32 C31 C30 122.4(4) . . ?
C31 N32 C27 117.3(3) . . ?
C31 N32 Re1 125.0(3) . . ?
C27 N32 Re1 117.6(3) . . ?
C46 N41 C42 118.0(3) . . ?
C46 N41 Re1 117.1(2) . . ?
C42 N41 Re1 124.7(3) . . ?
N41 C42 C43 122.5(4) . . ?
C42 C43 C44 120.0(4) . . ?
C45 C44 C43 117.4(4) . . ?
C45 C44 C53 122.2(4) . . ?
C43 C44 C53 120.4(4) . . ?
C44 C45 C46 120.9(4) . . ?
N41 C46 C45 121.1(3) . . ?
N41 C46 C47 114.6(3) . . ?
C45 C46 C47 124.3(3) . . ?
N52 C47 C48 121.9(3) . . ?
N52 C47 C46 114.3(3) . . ?
C48 C47 C46 123.9(3) . . ?
C47 C48 C49 120.3(4) . . ?
C48 C49 C50 117.2(3) . . ?
C48 C49 C54 121.1(4) . . ?
C50 C49 C54 121.7(4) . . ?
C51 C50 C49 120.3(4) . . ?
N52 C51 C50 122.9(4) . . ?
C51 N52 C47 117.4(3) . . ?
C51 N52 Re1 125.7(2) . . ?
C47 N52 Re1 116.9(2) . . ?
O67 S60 O66 122.0(5) . . ?
O67 S60 O65 113.1(5) . . ?
O66 S60 O65 111.7(5) . . ?
O67 S60 C61 101.8(4) . . ?
O66 S60 C61 104.2(4) . . ?
O65 S60 C61 100.7(4) . . ?
F64 C61 F62 105.5(7) . . ?
F64 C61 F63 105.6(7) . . ?
F62 C61 F63 105.1(6) . . ?
F64 C61 S60 112.7(6) . . ?
F62 C61 S60 113.5(6) . . ?
F63 C61 S60 113.6(6) . . ?
O76 S70 O77 117.1(4) . . ?
O76 S70 O75 114.5(4) . . ?
O77 S70 O75 112.5(4) . . ?
O76 S70 C71 103.4(3) . . ?
O77 S70 C71 103.9(4) . . ?
O75 S70 C71 103.3(4) . . ?
F73 C71 F72 106.4(6) . . ?
F73 C71 F74 105.3(6) . . ?
F72 C71 F74 104.2(6) . . ?
F73 C71 S70 114.1(6) . . ?
F72 C71 S70 114.3(5) . . ?
F74 C71 S70 111.7(5) . . ?
O65' S60' O66' 115.5(6) . . ?
O65' S60' O67' 115.2(6) . . ?
O66' S60' O67' 116.4(6) . . ?
O65' S60' C61' 102.3(5) . . ?
O66' S60' C61' 103.5(5) . . ?
O67' S60' C61' 100.7(5) . . ?
F62' C61' F64' 105.8(7) . . ?
F62' C61' F63' 105.9(7) . . ?
F64' C61' F63' 105.7(7) . . ?
F62' C61' S60' 112.9(7) . . ?
F64' C61' S60' 112.9(7) . . ?
F63' C61' S60' 112.9(7) . . ?
O77' S70' O76' 115.1(6) . . ?
O77' S70' O75' 115.7(6) . . ?
O76' S70' O75' 114.9(6) . . ?
O77' S70' C71' 102.9(5) . . ?
O76' S70' C71' 103.0(5) . . ?
O75' S70' C71' 102.5(5) . . ?
F74' C71' F72' 106.5(8) . . ?
F74' C71' F73' 105.6(8) . . ?
F72' C71' F73' 105.1(7) . . ?
F74' C71' S70' 113.5(7) . . ?
F72' C71' S70' 113.1(7) . . ?
F73' C71' S70' 112.3(7) . . ?
 
_refine_diff_density_max    2.302
_refine_diff_density_min   -1.538
_refine_diff_density_rms    0.169

_vrf_CHEMW03_9647sq
;
PROBLEM: WARNING: The ratio of given/expected molecular weight as
RESPONSE: Compund contains two molecules of methanol which were found to be 
severely disordered. Disorder could not be modelled with split model. 
Platon/Squeeze was therefore used to remove scattering contibution of the 
methanol molecules. Sum formula and derived values were calculated for the 
solvent containing compound (mass difference 64.08 g mol-1). 
;

_shelx_res_file
;
TITL [(Me2bpy)3Re](OTf)2 * 2 MeOH ; Solvent removed with SQUEEZE
TITL 9647SQ Mei Wang in P2(1)/c
CELL 0.71073  13.180  19.315  17.588  90.000  95.874  90.000
ZERR    4.00   0.002   0.003   0.002   0.000   0.002   0.000
LATT  1
SYMM -X, 0.5+Y, 0.5-Z
SFAC C H N O F S RE
UNIT 160 176 24 32 24 8 4

OMIT -3 64

TEMP -173

OMIT 0 1 1
OMIT 1 0 0
OMIT 1 1 0
OMIT -1 1 1
OMIT 0 2 0
OMIT 0 0 2
OMIT 1 1 2
OMIT 1 3 2
OMIT 1 7 2
OMIT -1 7 2

SIZE 0.15 0.12 0.12

L.S. 12

ACTA

BOND
FMAP 2

PLAN 20

EADP S60 S60'
EADP C61 C61'
EADP F62 F62'
EADP F63 F63'
EADP F64 F64'
EADP O65 O65'
EADP O66 O66'
EADP O67 O67'

EADP S70 S70'
EADP C71 C71'
EADP F72 F72'
EADP F73 F73'
EADP F74 F74'
EADP O75 O75'
EADP O76 O76'
EADP O77 O77'

SADI 0.01 C61 F62 C61 F63 C61 F64 C71 F72 C71 F73 C71 F74 =
          C61' F62' C61' F63' C61' F64' C71' F72' =
          C71' F73' C71' F74'

SADI 0.01 F62 F63 F63 F64 F64 F62 F72 F73 F73 F74 F74 F72 =
          F62' F63' F63' F64' F64' F62' F72' F73' =
          F73' F74' F74' F72'

SADI 0.01 S60 O65 S60 O66 S60 O67 S70 O75 S70 O76 S70 O77 =
          S60' O65' S60' O66' S60' O67' S70' O75' =
          S70' O76' S70' O77'

SADI 0.01 O65 O66 O66 O67 O67 O65 O75 O76 O76 O77 O77 O75 =
          O65' O66' O66' O67' O67' O65' O75' O76' =
          O76' O77' O77' O75'

SADI 0.01 S60 C61 S60' C61' S70 C71 S70' C71'

SADI 0.01 S60 F62 S60 F63 S60 F64 S70 F72 S70 F73 S70 F74 =
          S60' F62' S60' F63' S60' F64' S70' F72' =
          S70' F73' S70' F74'

SADI 0.01 C61 O65 C61 O66 C61 O67 C71 O75 C71 O76 C71 O77 =
          C61' O65' C61' O66' C61' O67' C71' O75' =
          C71' O76' C71' O77'

ISOR 0.005 C61 > O67
ISOR 0.005 C71 > O77

ABIN

WGHT    0.068100   16.117800
FVAR       0.05512   0.66039   0.76571
RE1   7    0.727056    0.991968    0.768656    11.00000    0.02128    0.01919 =
         0.02434    0.00128   -0.00163    0.00030
N1    3    0.826951    0.970334    0.688680    11.00000    0.02209    0.03225 =
         0.02168    0.00591   -0.00364    0.00155
C2    1    0.832928    0.907918    0.652429    11.00000    0.04181    0.02823 =
         0.03362   -0.00266   -0.00105    0.00694
AFIX  43
H2    2    0.782084    0.874085    0.658551    11.00000   -1.20000
AFIX   0
C3    1    0.909384    0.892036    0.607495    11.00000    0.05719    0.04138 =
         0.03167   -0.00402    0.00449    0.01902
AFIX  43
H3    2    0.909660    0.848201    0.583018    11.00000   -1.20000
AFIX   0
C4    1    0.985842    0.939377    0.597675    11.00000    0.04201    0.05735 =
         0.03482    0.00469    0.00868    0.02270
C5    1    0.980187    1.003069    0.633275    11.00000    0.02748    0.05159 =
         0.03655    0.00684    0.00747    0.00555
AFIX  43
H5    2    1.030889    1.037092    0.627517    11.00000   -1.20000
AFIX   0
C6    1    0.900736    1.017740    0.677512    11.00000    0.02375    0.03053 =
         0.02899    0.00409    0.00167    0.00460
C7    1    0.887130    1.083601    0.716662    11.00000    0.02478    0.02616 =
         0.03037    0.00230    0.00001   -0.00152
C8    1    0.948020    1.141777    0.710712    11.00000    0.03404    0.03668 =
         0.04502    0.00415    0.00405   -0.01027
AFIX  43
H8    2    1.003602    1.139883    0.680384    11.00000   -1.20000
AFIX   0
C9    1    0.928538    1.202033    0.748320    11.00000    0.05015    0.03338 =
         0.05046    0.00265   -0.00402   -0.02016
C10   1    0.847393    1.201946    0.793015    11.00000    0.04873    0.02153 =
         0.03860   -0.00196   -0.00889   -0.00467
AFIX  43
H10   2    0.831375    1.242712    0.819548    11.00000   -1.20000
AFIX   0
C11   1    0.790286    1.142945    0.798875    11.00000    0.03084    0.02018 =
         0.02911   -0.00052   -0.00705    0.00127
AFIX  43
H11   2    0.736208    1.143672    0.830671    11.00000   -1.20000
AFIX   0
N12   3    0.808200    1.083978    0.761111    11.00000    0.02209    0.02087 =
         0.02572    0.00108   -0.00358    0.00034
C13   1    1.072537    0.921421    0.552026    11.00000    0.05550    0.08420 =
         0.05406    0.00022    0.01951    0.02813
AFIX 137
H13A  2    1.116147    0.962128    0.548342    11.00000   -1.50000
H13B  2    1.045327    0.906711    0.500621    11.00000   -1.50000
H13C  2    1.112675    0.883713    0.577347    11.00000   -1.50000
AFIX   0
C14   1    0.992747    1.266419    0.742569    11.00000    0.09840    0.05298 =
         0.09064   -0.01169    0.02164   -0.05040
AFIX 137
H14A  2    1.006879    1.273054    0.689425    11.00000   -1.50000
H14B  2    1.057188    1.261192    0.775156    11.00000   -1.50000
H14C  2    0.955752    1.306704    0.759403    11.00000   -1.50000
AFIX   0
N21   3    0.826830    0.965039    0.864121    11.00000    0.02487    0.02115 =
         0.02785    0.00252   -0.00540   -0.00047
C22   1    0.917871    0.933096    0.861810    11.00000    0.02800    0.03123 =
         0.03825    0.00161   -0.00677    0.00200
AFIX  43
H22   2    0.943415    0.926633    0.813723    11.00000   -1.20000
AFIX   0
C23   1    0.974853    0.909599    0.926863    11.00000    0.03731    0.03204 =
         0.05179    0.00419   -0.01786    0.00238
AFIX  43
H23   2    1.038319    0.887222    0.923049    11.00000   -1.20000
AFIX   0
C24   1    0.939373    0.918669    0.998181    11.00000    0.05639    0.03424 =
         0.03923    0.00442   -0.02649   -0.00328
C25   1    0.848417    0.953718    1.001096    11.00000    0.05466    0.03302 =
         0.02850    0.00401   -0.01190   -0.00284
AFIX  43
H25   2    0.823287    0.962088    1.048990    11.00000   -1.20000
AFIX   0
C26   1    0.793620    0.976751    0.934140    11.00000    0.03658    0.02546 =
         0.02430    0.00160   -0.00516   -0.00424
C27   1    0.696137    1.013727    0.931938    11.00000    0.03575    0.02516 =
         0.02570    0.00120    0.00318   -0.00566
C28   1    0.654607    1.039322    0.995543    11.00000    0.05057    0.03218 =
         0.02721   -0.00132    0.00902   -0.01018
AFIX  43
H28   2    0.689459    1.032439    1.044965    11.00000   -1.20000
AFIX   0
C29   1    0.562611    1.074913    0.987799    11.00000    0.05151    0.02996 =
         0.03968   -0.00430    0.02138   -0.01035
C30   1    0.513213    1.080528    0.914881    11.00000    0.03969    0.03032 =
         0.05179    0.00134    0.02194    0.00341
AFIX  43
H30   2    0.448728    1.102843    0.907440    11.00000   -1.20000
AFIX   0
C31   1    0.556187    1.054226    0.852906    11.00000    0.03080    0.03000 =
         0.03724    0.00388    0.00707    0.00294
AFIX  43
H31   2    0.519851    1.058383    0.803611    11.00000   -1.20000
AFIX   0
N32   3    0.648651    1.022543    0.859646    11.00000    0.02577    0.01964 =
         0.02751    0.00178    0.00204   -0.00083
C33   1    0.998085    0.889975    1.069536    11.00000    0.07365    0.05097 =
         0.05117    0.01025   -0.03606    0.00226
AFIX 137
H33A  2    0.981229    0.916489    1.114058    11.00000   -1.50000
H33B  2    1.071412    0.893532    1.065080    11.00000   -1.50000
H33C  2    0.979700    0.841289    1.075759    11.00000   -1.50000
AFIX   0
C34   1    0.519931    1.107280    1.055350    11.00000    0.07020    0.04233 =
         0.05232   -0.01358    0.03589   -0.01356
AFIX 137
H34A  2    0.545216    1.154839    1.061937    11.00000   -1.50000
H34B  2    0.541441    1.080367    1.101430    11.00000   -1.50000
H34C  2    0.445285    1.107755    1.046761    11.00000   -1.50000
AFIX   0
N41   3    0.642892    0.900129    0.766590    11.00000    0.02698    0.02065 =
         0.02702    0.00321   -0.00261   -0.00340
C42   1    0.667416    0.844237    0.811674    11.00000    0.03534    0.02553 =
         0.03845    0.00984   -0.00633   -0.00291
AFIX  43
H42   2    0.729539    0.844840    0.844234    11.00000   -1.20000
AFIX   0
C43   1    0.605880    0.786955    0.811969    11.00000    0.04452    0.02618 =
         0.04421    0.01139   -0.00210   -0.00856
AFIX  43
H43   2    0.626967    0.748146    0.842809    11.00000   -1.20000
AFIX   0
C44   1    0.512557    0.785696    0.767086    11.00000    0.03863    0.03169 =
         0.04154    0.00579    0.00021   -0.01573
C45   1    0.488114    0.842228    0.720723    11.00000    0.03006    0.03324 =
         0.03384    0.00138   -0.00031   -0.01111
AFIX  43
H45   2    0.425568    0.842676    0.688660    11.00000   -1.20000
AFIX   0
C46   1    0.553807    0.898455    0.720361    11.00000    0.02597    0.02362 =
         0.02401    0.00032    0.00029   -0.00339
C47   1    0.534543    0.959773    0.671963    11.00000    0.02232    0.02375 =
         0.02304    0.00030   -0.00037   -0.00084
C48   1    0.449401    0.967722    0.619237    11.00000    0.02422    0.03097 =
         0.02576   -0.00276    0.00049   -0.00060
AFIX  43
H48   2    0.399663    0.932025    0.612983    11.00000   -1.20000
AFIX   0
C49   1    0.436644    1.027763    0.575527    11.00000    0.02678    0.03491 =
         0.02112   -0.00267   -0.00182    0.00615
C50   1    0.514207    1.077092    0.585014    11.00000    0.03262    0.02649 =
         0.02525    0.00191   -0.00058    0.00618
AFIX  43
H50   2    0.509316    1.118248    0.555287    11.00000   -1.20000
AFIX   0
C51   1    0.597740    1.066374    0.637243    11.00000    0.02769    0.02067 =
         0.02700    0.00137    0.00162    0.00155
AFIX  43
H51   2    0.650042    1.100409    0.641943    11.00000   -1.20000
AFIX   0
N52   3    0.608700    1.009437    0.682259    11.00000    0.02249    0.01891 =
         0.02311   -0.00051    0.00093    0.00072
C53   1    0.442917    0.724889    0.769628    11.00000    0.06132    0.04658 =
         0.07181    0.01753   -0.00977   -0.03146
AFIX 137
H53A  2    0.481761    0.682075    0.765150    11.00000   -1.50000
H53B  2    0.388777    0.727828    0.727194    11.00000   -1.50000
H53C  2    0.412535    0.724879    0.818207    11.00000   -1.50000
AFIX   0
C54   1    0.342110    1.039191    0.521520    11.00000    0.03109    0.04811 =
         0.03223   -0.00201   -0.00733    0.01101
AFIX 137
H54A  2    0.306105    0.995124    0.512256    11.00000   -1.50000
H54B  2    0.361164    1.057602    0.473039    11.00000   -1.50000
H54C  2    0.297450    1.072298    0.544067    11.00000   -1.50000
AFIX   0

PART   1

S60   6    0.258245    1.087772    0.748497    21.00000    0.04367    0.12466 =
         0.06700   -0.02749    0.00540   -0.00282
C61   1    0.242927    0.998358    0.760646    21.00000    0.07131    0.09152 =
         0.05709    0.01811   -0.01039   -0.00393
F62   5    0.155739    0.981439    0.788819    21.00000    0.09412    0.20603 =
         0.11480    0.00210    0.03582   -0.01687
F63   5    0.242598    0.962175    0.695750    21.00000    0.10311    0.15772 =
         0.10375   -0.04753    0.01988    0.02528
F64   5    0.316808    0.970699    0.808674    21.00000    0.14291    0.21262 =
         0.14194    0.03046   -0.02043    0.00960
O65   4    0.191447    1.099272    0.678420    21.00000    0.11480    0.15210 =
         0.14438    0.01159   -0.02486   -0.02447
O66   4    0.362561    1.095364    0.736521    21.00000    0.05220    0.15920 =
         0.08174   -0.01326    0.00710    0.02112
O67   4    0.219211    1.114072    0.812804    21.00000    0.04729    0.09482 =
         0.07144    0.00146    0.03134    0.01784
S70   6    0.677128    1.272035    0.967056    31.00000    0.04128    0.03017 =
         0.04707   -0.00196    0.00069    0.00122
C71   1    0.779517    1.265363    1.036803    31.00000    0.08565    0.09493 =
         0.08053    0.01827    0.00384   -0.00883
F72   5    0.868898    1.254421    1.009644    31.00000    0.06053    0.09630 =
         0.17129    0.02402   -0.02108    0.01458
F73   5    0.769488    1.215949    1.087939    31.00000    0.18532    0.21220 =
         0.14580    0.09822   -0.02061   -0.01874
F74   5    0.793719    1.324353    1.077772    31.00000    0.14081    0.19874 =
         0.10700   -0.06686   -0.00937   -0.05356
O75   4    0.675824    1.206062    0.929773    31.00000    0.10852    0.07305 =
         0.10076   -0.04881    0.05818   -0.03000
O76   4    0.704523    1.328238    0.921630    31.00000    0.07021    0.07411 =
         0.12301    0.06487   -0.04746   -0.02469
O77   4    0.591840    1.281715    1.009339    31.00000    0.06632    0.07694 =
         0.15250   -0.04370    0.05197   -0.01110
PART   2

S60'  6    0.264056    1.097423    0.767122   -21.00000    0.04367    0.12466 =
         0.06700   -0.02749    0.00540   -0.00282
C61'  1    0.226957    1.010576    0.759215   -21.00000    0.07131    0.09152 =
         0.05709    0.01811   -0.01039   -0.00393
F62'  5    0.137470    0.998514    0.785871   -21.00000    0.09412    0.20603 =
         0.11480    0.00210    0.03582   -0.01687
F63'  5    0.217184    0.987928    0.687013   -21.00000    0.10311    0.15772 =
         0.10375   -0.04753    0.01988    0.02528
F64'  5    0.293454    0.967765    0.797537   -21.00000    0.14291    0.21262 =
         0.14194    0.03046   -0.02043    0.00960
O65'  4    0.179725    1.131936    0.726927   -21.00000    0.11480    0.15210 =
         0.14438    0.01159   -0.02486   -0.02447
O66'  4    0.356206    1.099215    0.731714   -21.00000    0.05220    0.15920 =
         0.08174   -0.01326    0.00710    0.02112
O67'  4    0.273491    1.106066    0.848594   -21.00000    0.04729    0.09482 =
         0.07144    0.00146    0.03134    0.01784
S70'  6    0.700225    1.299395    0.986963   -31.00000    0.04128    0.03017 =
         0.04707   -0.00196    0.00069    0.00122
C71'  1    0.783937    1.237708    1.029798   -31.00000    0.08565    0.09493 =
         0.08053    0.01827    0.00384   -0.00883
F72'  5    0.881486    1.256832    1.032737   -31.00000    0.06053    0.09630 =
         0.17129    0.02402   -0.02108    0.01458
F73'  5    0.767629    1.225224    1.102605   -31.00000    0.18532    0.21220 =
         0.14580    0.09822   -0.02061   -0.01874
F74'  5    0.777149    1.176476    0.995022   -31.00000    0.14081    0.19874 =
         0.10700   -0.06686   -0.00937   -0.05356
O75'  4    0.732346    1.361225    1.026924   -31.00000    0.10852    0.07305 =
         0.10076   -0.04881    0.05818   -0.03000
O76'  4    0.720632    1.297440    0.908961   -31.00000    0.07021    0.07411 =
         0.12301    0.06487   -0.04746   -0.02469
O77'  4    0.603045    1.273426    1.001370   -31.00000    0.06632    0.07694 =
         0.15250   -0.04370    0.05197   -0.01110
HKLF 4

REM  9647SQ Mei Wang in P2(1)/c
REM R1 =  0.0418 for   12608 Fo > 4sig(Fo)  and  0.0526 for all   14887 data
REM    588 parameters refined using    486 restraints

END

WGHT      0.0681     16.1219

REM Highest difference peak  2.302,  deepest hole -1.538,  1-sigma level  0.169
Q1    1   0.1327  1.0550  0.7976  11.00000  0.05    2.30
Q2    1   0.7174  1.0296  0.7691  11.00000  0.05    2.12
Q3    1   0.2071  1.1019  0.8014  11.00000  0.05    2.04
Q4    1   0.6938  0.9703  0.7735  11.00000  0.05    1.94
Q5    1   0.3382  1.0209  0.7574  11.00000  0.05    1.81
Q6    1   0.1816  1.1785  0.7873  11.00000  0.05    1.80
Q7    1   0.1489  0.9158  0.8159  11.00000  0.05    1.71
Q8    1   0.7429  0.9899  0.7304  11.00000  0.05    1.48
Q9    1   0.2726  1.1019  0.8833  11.00000  0.05    1.39
Q10   1   0.2157  1.0234  0.7733  11.00000  0.05    1.36
Q11   1   0.7364  1.2693  1.0002  11.00000  0.05    1.31
Q12   1   0.7764  1.3593  1.0585  11.00000  0.05    1.31
Q13   1   0.7874  1.1819  1.0417  11.00000  0.05    1.30
Q14   1   0.7288  1.3129  0.9056  11.00000  0.05    1.29
Q15   1   0.2465  1.0699  0.6683  11.00000  0.05    1.27
Q16   1   0.2117  0.8918  0.7792  11.00000  0.05    1.22
Q17   1   0.1811  1.1093  0.7014  11.00000  0.05    1.22
Q18   1   0.7399  1.2630  1.1047  11.00000  0.05    1.20
Q19   1   0.7167  1.0100  0.8127  11.00000  0.05    1.13
Q20   1   0.6919  1.0109  0.7975  11.00000  0.05    1.11
;
_shelx_res_checksum   21459

#===END

 
data_5
 
_audit_creation_method            SHELXL-2013
_audit_creation_date              2014-01-20
_audit_block_code                 WGT-WM-056-01
_chemical_name_systematic
;
 ?
;
_chemical_name_common             ?
_chemical_melting_point           ?
_chemical_formula_moiety          
 'C30 H22 N6 Re, C15 H23 O' 
_chemical_formula_sum
 'C45 H45 N6 O Re' 
_chemical_formula_weight          872.07

loop_
 _atom_type_symbol
 _atom_type_description
 _atom_type_scat_dispersion_real
 _atom_type_scat_dispersion_imag
 _atom_type_scat_source
 'C'  'C'   0.0033   0.0016
 'International Tables Vol C Tables 4.2.6.8 and 6.1.1.4'
 'H'  'H'   0.0000   0.0000
 'International Tables Vol C Tables 4.2.6.8 and 6.1.1.4'
 'N'  'N'   0.0061   0.0033
 'International Tables Vol C Tables 4.2.6.8 and 6.1.1.4'
 'Re'  'Re'  -1.0185   7.2310
 'International Tables Vol C Tables 4.2.6.8 and 6.1.1.4'
 'O'  'O'   0.0106   0.0060
 'International Tables Vol C Tables 4.2.6.8 and 6.1.1.4'
 
_space_group_crystal_system       triclinic
_space_group_IT_number            2
_space_group_name_H-M_alt         'P -1'
_space_group_name_Hall            '-P 1'
 
 
loop_
 _space_group_symop_operation_xyz
 'x, y, z'
 '-x, -y, -z'
 
_cell_length_a                    9.3239(9)
_cell_length_b                    15.0576(15)
_cell_length_c                    15.723(2)
_cell_angle_alpha                 84.263(2)
_cell_angle_beta                  80.615(2)
_cell_angle_gamma                 73.730(2)
_cell_volume                      2087.2(4)
_cell_formula_units_Z             2
_cell_measurement_temperature     100(2)
_cell_measurement_reflns_used     9718
_cell_measurement_theta_min       2.3519
_cell_measurement_theta_max       31.6880

loop_
 _exptl_crystal_face_index_h
 _exptl_crystal_face_index_k
 _exptl_crystal_face_index_l
 _exptl_crystal_face_perp_dist
    0.00    0.00   -1.00    0.0750
    0.00    0.00    1.00    0.0750
   -1.00    0.00    0.00    0.1700
    2.00   -1.00   -1.00    0.1700
    0.00   -2.00    1.00    0.0200
    0.00    2.00   -1.00    0.0200

_exptl_crystal_description        platelet
_exptl_crystal_colour             black
_exptl_crystal_size_max           0.34
_exptl_crystal_size_mid           0.15
_exptl_crystal_size_min           0.04
_exptl_crystal_density_meas       ? 
_exptl_crystal_density_method     ?              
_exptl_crystal_density_diffrn     1.388          
_exptl_crystal_F_000              1308
_exptl_transmission_factor_min    ?                                             
_exptl_transmission_factor_max    ?                                             
_exptl_absorpt_coefficient_mu     2.951
_exptl_absorpt_correction_type    gaussian
_exptl_absorpt_process_details    'SADABS (Bruker AXS, 2008)' 
_exptl_absorpt_correction_T_min   0.23781
_exptl_absorpt_correction_T_max   0.80037
 
_exptl_special_details
;
 ?
;
 
_diffrn_ambient_temperature       100(2)
_diffrn_radiation_wavelength      0.71073
_diffrn_radiation_type            MoK\a
_diffrn_radiation_source          '0.2 x 2mm^2^ focus rotating anode'
_diffrn_radiation_monochromator   'Incoatec Helios mirrors'
_diffrn_measurement_device_type   'Bruker-AXS Kappa Mach3 APEX-II'
_diffrn_measurement_method        'CCD \f- and \w-scans'
_diffrn_detector_area_resol_mean  66.67
_diffrn_reflns_number             62890
_diffrn_reflns_av_unetI/netI      0.0356
_diffrn_reflns_av_R_equivalents   0.0449
_diffrn_reflns_limit_h_min        -13
_diffrn_reflns_limit_h_max        13
_diffrn_reflns_limit_k_min        -22
_diffrn_reflns_limit_k_max        22
_diffrn_reflns_limit_l_min        -23
_diffrn_reflns_limit_l_max        23
_diffrn_reflns_theta_min          1.315
_diffrn_reflns_theta_max          31.764
_diffrn_reflns_theta_full         25.242
_diffrn_measured_fraction_theta_max   0.997
_diffrn_measured_fraction_theta_full  1.000
_diffrn_reflns_Laue_measured_fraction_max    0.997
_diffrn_reflns_Laue_measured_fraction_full   1.000
_diffrn_reflns_point_group_measured_fraction_max   0.997
_diffrn_reflns_point_group_measured_fraction_full  1.000
_reflns_number_total              14159
_reflns_number_gt                 12914
_reflns_threshold_expression      'I > 2\s(I)'
_reflns_Friedel_coverage          0.000
_reflns_Friedel_fraction_max      .
_reflns_Friedel_fraction_full     .
 
_reflns_special_details
;
 Reflections were merged by SHELXL according to the crystal
 class for the calculation of statistics and refinement.
 
 Structure factors included contributions from the .fab file.
 
 _reflns_Friedel_fraction is defined as the number of unique
 Friedel pairs measured divided by the number that would be
 possible theoretically, ignoring centric projections and
 systematic absences.
;
 
_computing_data_collection        'APEX2 (Bruker AXS, 2008)'
_computing_cell_refinement        'SAINT software (Bruker AXS, 2004)'
_computing_data_reduction         'SAINT software (Bruker AXS, 2004)'
_computing_structure_solution     'SHELXS-2013 (Sheldrick, 2013)'
_computing_structure_refinement   'SHELXL-2013 (Sheldrick, 2013)'
_computing_molecular_graphics     ?
_computing_publication_material   ?
 
_refine_special_details
;
 ?
;
_refine_ls_structure_factor_coef  Fsqd
_refine_ls_matrix_type            full
_refine_ls_weighting_scheme       calc
_refine_ls_weighting_details
;
 w=1/[\s^2^(Fo^2^)+(0.0292P)^2^+0.7261P]
 where P=(Fo^2^+2Fc^2^)/3
;
_atom_sites_solution_primary      ?
_atom_sites_solution_secondary    ?
_atom_sites_solution_hydrogens    geom
_refine_ls_hydrogen_treatment     constr
_refine_ls_extinction_method      none
_refine_ls_extinction_coef        .
_refine_ls_number_reflns          14159
_refine_ls_number_parameters      486
_refine_ls_number_restraints      0
_refine_ls_R_factor_all           0.0287
_refine_ls_R_factor_gt            0.0242
_refine_ls_wR_factor_ref          0.0604
_refine_ls_wR_factor_gt           0.0581
_refine_ls_goodness_of_fit_ref    1.047
_refine_ls_restrained_S_all       1.047
_refine_ls_shift/su_max           0.005
_refine_ls_shift/su_mean          0.000
 
loop_
 _atom_site_label
 _atom_site_type_symbol
 _atom_site_fract_x
 _atom_site_fract_y
 _atom_site_fract_z
 _atom_site_U_iso_or_equiv
 _atom_site_adp_type
 _atom_site_occupancy
 _atom_site_site_symmetry_order  
 _atom_site_calc_flag
 _atom_site_refinement_flags_posn
 _atom_site_refinement_flags_adp
 _atom_site_refinement_flags_occupancy
 _atom_site_disorder_assembly
 _atom_site_disorder_group
Re1 Re 0.58635(2) -0.62289(2) 0.26320(2) 0.01523(2) Uani 1 1 d . . . . .
N1 N 0.78486(18) -0.59124(11) 0.20664(10) 0.0179(3) Uani 1 1 d . . . . .
C2 C 0.9228(2) -0.65328(14) 0.18950(14) 0.0241(4) Uani 1 1 d . . . . .
H2 H 0.9315 -0.7172 0.2035 0.029 Uiso 1 1 calc R U . . .
C3 C 1.0500(2) -0.62648(16) 0.15250(15) 0.0286(4) Uani 1 1 d . . . . .
H3 H 1.1439 -0.6716 0.1405 0.034 Uiso 1 1 calc R U . . .
C4 C 1.0400(2) -0.53275(16) 0.13289(15) 0.0296(4) Uani 1 1 d . . . . .
H4 H 1.1268 -0.5134 0.1075 0.036 Uiso 1 1 calc R U . . .
C5 C 0.9029(2) -0.46874(15) 0.15074(13) 0.0241(4) Uani 1 1 d . . . . .
H5 H 0.8946 -0.4045 0.1387 0.029 Uiso 1 1 calc R U . . .
C6 C 0.7754(2) -0.49853(13) 0.18669(12) 0.0181(3) Uani 1 1 d . . . . .
C7 C 0.6249(2) -0.43759(12) 0.20411(11) 0.0170(3) Uani 1 1 d . . . . .
C8 C 0.5799(2) -0.34205(13) 0.18915(12) 0.0198(3) Uani 1 1 d . . . . .
H8 H 0.6530 -0.3088 0.1691 0.024 Uiso 1 1 calc R U . . .
C9 C 0.4280(2) -0.29530(13) 0.20361(13) 0.0212(4) Uani 1 1 d . . . . .
H9 H 0.3966 -0.2301 0.1921 0.025 Uiso 1 1 calc R U . . .
C10 C 0.3208(2) -0.34401(13) 0.23516(12) 0.0191(3) Uani 1 1 d . . . . .
H10 H 0.2163 -0.3127 0.2435 0.023 Uiso 1 1 calc R U . . .
C11 C 0.3697(2) -0.43848(12) 0.25394(11) 0.0158(3) Uani 1 1 d . . . . .
N12 N 0.52061(17) -0.48604(10) 0.23864(9) 0.0150(3) Uani 1 1 d . . . . .
C13 C 0.2769(2) -0.49876(12) 0.29291(11) 0.0161(3) Uani 1 1 d . . . . .
C14 C 0.1207(2) -0.46906(13) 0.31641(12) 0.0199(3) Uani 1 1 d . . . . .
H14 H 0.0671 -0.4067 0.3040 0.024 Uiso 1 1 calc R U . . .
C15 C 0.0451(2) -0.53155(15) 0.35789(14) 0.0253(4) Uani 1 1 d . . . . .
H15 H -0.0610 -0.5122 0.3752 0.030 Uiso 1 1 calc R U . . .
C16 C 0.1251(2) -0.62306(15) 0.37421(15) 0.0266(4) Uani 1 1 d . . . . .
H16 H 0.0743 -0.6666 0.4029 0.032 Uiso 1 1 calc R U . . .
C17 C 0.2787(2) -0.64991(14) 0.34833(13) 0.0225(4) Uani 1 1 d . . . . .
H17 H 0.3321 -0.7128 0.3587 0.027 Uiso 1 1 calc R U . . .
N18 N 0.35679(18) -0.58953(11) 0.30836(10) 0.0174(3) Uani 1 1 d . . . . .
N21 N 0.54256(18) -0.67188(11) 0.15472(10) 0.0197(3) Uani 1 1 d . . . . .
C22 C 0.4771(2) -0.61764(15) 0.08895(13) 0.0248(4) Uani 1 1 d . . . . .
H22 H 0.4575 -0.5523 0.0895 0.030 Uiso 1 1 calc R U . . .
C23 C 0.4385(3) -0.65419(18) 0.02190(14) 0.0312(5) Uani 1 1 d . . . . .
H23 H 0.3920 -0.6144 -0.0224 0.037 Uiso 1 1 calc R U . . .
C24 C 0.4682(3) -0.75027(17) 0.01953(14) 0.0323(5) Uani 1 1 d . . . . .
H24 H 0.4430 -0.7767 -0.0265 0.039 Uiso 1 1 calc R U . . .
C25 C 0.5343(3) -0.80562(16) 0.08493(14) 0.0299(5) Uani 1 1 d . . . . .
H25 H 0.5561 -0.8711 0.0840 0.036 Uiso 1 1 calc R U . . .
C26 C 0.5701(2) -0.76637(14) 0.15340(13) 0.0229(4) Uani 1 1 d . . . . .
C27 C 0.6303(2) -0.81748(13) 0.22818(14) 0.0253(4) Uani 1 1 d . . . . .
C28 C 0.6637(3) -0.91272(15) 0.24716(17) 0.0356(5) Uani 1 1 d . . . . .
H28 H 0.6545 -0.9525 0.2063 0.043 Uiso 1 1 calc R U . . .
C29 C 0.7102(3) -0.94948(16) 0.32550(19) 0.0399(6) Uani 1 1 d . . . . .
H29 H 0.7311 -1.0144 0.3387 0.048 Uiso 1 1 calc R U . . .
C30 C 0.7264(3) -0.89167(16) 0.38503(17) 0.0343(5) Uani 1 1 d . . . . .
H30 H 0.7576 -0.9167 0.4390 0.041 Uiso 1 1 calc R U . . .
C31 C 0.6963(2) -0.79690(14) 0.36443(14) 0.0247(4) Uani 1 1 d . . . . .
N32 N 0.64572(18) -0.75957(11) 0.28723(11) 0.0207(3) Uani 1 1 d . . . . .
C33 C 0.7086(2) -0.72671(13) 0.41726(13) 0.0219(4) Uani 1 1 d . . . . .
C34 C 0.7679(2) -0.74395(16) 0.49531(14) 0.0273(4) Uani 1 1 d . . . . .
H34 H 0.8031 -0.8059 0.5178 0.033 Uiso 1 1 calc R U . . .
C35 C 0.7755(2) -0.67156(17) 0.53952(14) 0.0283(4) Uani 1 1 d . . . . .
H35 H 0.8168 -0.6828 0.5922 0.034 Uiso 1 1 calc R U . . .
C36 C 0.7214(2) -0.58101(16) 0.50558(13) 0.0253(4) Uani 1 1 d . . . . .
H36 H 0.7245 -0.5299 0.5354 0.030 Uiso 1 1 calc R U . . .
C37 C 0.6637(2) -0.56651(14) 0.42874(12) 0.0208(3) Uani 1 1 d . . . . .
H37 H 0.6270 -0.5046 0.4065 0.025 Uiso 1 1 calc R U . . .
N38 N 0.65705(17) -0.63737(11) 0.38304(10) 0.0178(3) Uani 1 1 d . . . . .
O41 O 0.02858(16) 0.26828(11) -0.24235(10) 0.0276(3) Uani 1 1 d . . . . .
C42 C 0.1478(2) 0.21164(13) -0.21737(13) 0.0202(3) Uani 1 1 d . . . . .
C43 C 0.1488(2) 0.17464(13) -0.12850(13) 0.0212(4) Uani 1 1 d . . . . .
C44 C 0.2834(2) 0.12138(14) -0.10166(14) 0.0232(4) Uani 1 1 d . . . . .
H44 H 0.2826 0.0997 -0.0428 0.028 Uiso 1 1 calc R U . . .
C45 C 0.4188(2) 0.09852(13) -0.15717(14) 0.0228(4) Uani 1 1 d . . . . .
C46 C 0.4158(2) 0.12818(12) -0.24436(14) 0.0218(4) Uani 1 1 d . . . . .
H46 H 0.5064 0.1101 -0.2836 0.026 Uiso 1 1 calc R U . . .
C47 C 0.2867(2) 0.18276(13) -0.27625(12) 0.0191(3) Uani 1 1 d . . . . .
C48 C 0.0002(2) 0.18919(14) -0.06593(13) 0.0250(4) Uani 1 1 d . . . . .
C49 C -0.0794(3) 0.29273(15) -0.05398(16) 0.0319(5) Uani 1 1 d . . . . .
H49A H -0.1774 0.2989 -0.0179 0.048 Uiso 1 1 calc R U . . .
H49B H -0.0945 0.3249 -0.1105 0.048 Uiso 1 1 calc R U . . .
H49C H -0.0167 0.3202 -0.0260 0.048 Uiso 1 1 calc R U . . .
C50 C -0.1039(3) 0.14394(16) -0.10288(15) 0.0295(4) Uani 1 1 d . . . . .
H50A H -0.0579 0.0770 -0.1046 0.044 Uiso 1 1 calc R U . . .
H50B H -0.1178 0.1704 -0.1614 0.044 Uiso 1 1 calc R U . . .
H50C H -0.2020 0.1556 -0.0661 0.044 Uiso 1 1 calc R U . . .
C51 C 0.0221(3) 0.14338(18) 0.02441(15) 0.0357(5) Uani 1 1 d . . . . .
H51A H 0.0661 0.0765 0.0202 0.054 Uiso 1 1 calc R U . . .
H51B H -0.0757 0.1549 0.0615 0.054 Uiso 1 1 calc R U . . .
H51C H 0.0901 0.1696 0.0492 0.054 Uiso 1 1 calc R U . . .
C52 C 0.5632(3) 0.04188(15) -0.12476(16) 0.0306(4) Uani 1 1 d . . . . .
H52A H 0.5457 0.0339 -0.0616 0.046 Uiso 1 1 calc R U . . .
H52B H 0.6423 0.0740 -0.1422 0.046 Uiso 1 1 calc R U . . .
H52C H 0.5952 -0.0190 -0.1494 0.046 Uiso 1 1 calc R U . . .
C53 C 0.2924(2) 0.21742(14) -0.37226(13) 0.0222(4) Uani 1 1 d . . . . .
C54 C 0.2821(3) 0.32165(15) -0.37927(14) 0.0296(4) Uani 1 1 d . . . . .
H54A H 0.3741 0.3310 -0.3636 0.044 Uiso 1 1 calc R U . . .
H54B H 0.1944 0.3541 -0.3400 0.044 Uiso 1 1 calc R U . . .
H54C H 0.2712 0.3461 -0.4387 0.044 Uiso 1 1 calc R U . . .
C55 C 0.4384(3) 0.16829(18) -0.42743(16) 0.0351(5) Uani 1 1 d . . . . .
H55A H 0.5243 0.1817 -0.4078 0.053 Uiso 1 1 calc R U . . .
H55B H 0.4343 0.1903 -0.4880 0.053 Uiso 1 1 calc R U . . .
H55C H 0.4504 0.1013 -0.4219 0.053 Uiso 1 1 calc R U . . .
C56 C 0.1612(3) 0.20249(17) -0.41188(15) 0.0320(5) Uani 1 1 d . . . . .
H56A H 0.1617 0.2312 -0.4707 0.048 Uiso 1 1 calc R U . . .
H56B H 0.0654 0.2309 -0.3766 0.048 Uiso 1 1 calc R U . . .
H56C H 0.1729 0.1359 -0.4136 0.048 Uiso 1 1 calc R U . . .
 
loop_
 _atom_site_aniso_label
 _atom_site_aniso_U_11
 _atom_site_aniso_U_22
 _atom_site_aniso_U_33
 _atom_site_aniso_U_23
 _atom_site_aniso_U_13
 _atom_site_aniso_U_12
Re1 0.01724(4) 0.01497(3) 0.01535(4) -0.00208(2) -0.00274(2) -0.00668(2)
N1 0.0189(7) 0.0197(7) 0.0164(7) -0.0034(6) -0.0021(6) -0.0068(6)
C2 0.0220(9) 0.0232(9) 0.0271(10) -0.0052(7) -0.0009(7) -0.0063(7)
C3 0.0193(9) 0.0300(10) 0.0349(11) -0.0070(9) 0.0020(8) -0.0056(8)
C4 0.0219(9) 0.0366(11) 0.0319(11) -0.0035(9) 0.0013(8) -0.0129(8)
C5 0.0221(9) 0.0269(9) 0.0258(9) -0.0008(7) -0.0014(7) -0.0122(7)
C6 0.0211(8) 0.0198(8) 0.0160(8) -0.0021(6) -0.0026(6) -0.0095(7)
C7 0.0185(7) 0.0200(8) 0.0160(8) -0.0019(6) -0.0030(6) -0.0102(6)
C8 0.0239(8) 0.0196(8) 0.0198(8) -0.0002(6) -0.0032(7) -0.0123(7)
C9 0.0247(9) 0.0169(8) 0.0238(9) 0.0002(7) -0.0048(7) -0.0083(7)
C10 0.0202(8) 0.0182(8) 0.0196(8) 0.0000(6) -0.0034(7) -0.0065(6)
C11 0.0184(7) 0.0173(7) 0.0141(7) -0.0006(6) -0.0037(6) -0.0079(6)
N12 0.0167(6) 0.0190(7) 0.0114(6) -0.0026(5) -0.0016(5) -0.0081(5)
C13 0.0185(7) 0.0183(7) 0.0144(7) -0.0006(6) -0.0049(6) -0.0083(6)
C14 0.0185(8) 0.0222(8) 0.0203(8) 0.0013(7) -0.0050(7) -0.0072(7)
C15 0.0185(8) 0.0279(9) 0.0296(10) 0.0046(8) -0.0021(7) -0.0094(7)
C16 0.0236(9) 0.0254(9) 0.0311(10) 0.0095(8) -0.0034(8) -0.0114(8)
C17 0.0221(9) 0.0200(8) 0.0260(9) 0.0047(7) -0.0034(7) -0.0087(7)
N18 0.0203(7) 0.0181(7) 0.0161(7) 0.0010(5) -0.0039(6) -0.0085(6)
N21 0.0215(7) 0.0237(7) 0.0167(7) -0.0051(6) -0.0001(6) -0.0108(6)
C22 0.0288(10) 0.0286(10) 0.0192(9) -0.0041(7) -0.0043(7) -0.0100(8)
C23 0.0370(12) 0.0409(12) 0.0197(9) -0.0062(9) -0.0053(8) -0.0149(10)
C24 0.0399(12) 0.0427(12) 0.0229(10) -0.0117(9) -0.0006(9) -0.0239(10)
C25 0.0371(11) 0.0314(10) 0.0277(10) -0.0115(8) 0.0027(9) -0.0204(9)
C26 0.0237(9) 0.0251(9) 0.0240(9) -0.0070(7) 0.0004(7) -0.0135(7)
C27 0.0285(10) 0.0187(8) 0.0312(10) -0.0057(7) -0.0020(8) -0.0102(7)
C28 0.0437(13) 0.0209(9) 0.0458(14) -0.0071(9) -0.0053(11) -0.0131(9)
C29 0.0462(14) 0.0185(9) 0.0549(16) 0.0013(10) -0.0105(12) -0.0080(9)
C30 0.0379(12) 0.0232(10) 0.0406(13) 0.0039(9) -0.0080(10) -0.0068(9)
C31 0.0265(9) 0.0193(8) 0.0289(10) 0.0004(7) -0.0060(8) -0.0067(7)
N32 0.0192(7) 0.0207(7) 0.0239(8) -0.0024(6) -0.0025(6) -0.0080(6)
C33 0.0203(8) 0.0221(8) 0.0233(9) 0.0016(7) -0.0041(7) -0.0063(7)
C34 0.0265(10) 0.0304(10) 0.0246(10) 0.0047(8) -0.0080(8) -0.0065(8)
C35 0.0259(10) 0.0407(12) 0.0195(9) 0.0022(8) -0.0072(8) -0.0099(9)
C36 0.0270(9) 0.0332(10) 0.0187(9) -0.0046(8) -0.0048(7) -0.0113(8)
C37 0.0223(8) 0.0235(8) 0.0180(8) -0.0030(7) -0.0037(7) -0.0074(7)
N38 0.0169(7) 0.0186(7) 0.0187(7) -0.0017(6) -0.0025(6) -0.0057(5)
O41 0.0205(6) 0.0285(7) 0.0293(8) 0.0079(6) -0.0029(6) -0.0028(6)
C42 0.0200(8) 0.0187(8) 0.0229(9) 0.0015(7) -0.0034(7) -0.0075(6)
C43 0.0242(9) 0.0199(8) 0.0222(9) 0.0012(7) -0.0037(7) -0.0108(7)
C44 0.0292(10) 0.0203(8) 0.0239(9) 0.0022(7) -0.0090(8) -0.0112(7)
C45 0.0238(9) 0.0175(8) 0.0303(10) 0.0006(7) -0.0116(8) -0.0072(7)
C46 0.0190(8) 0.0182(8) 0.0299(10) -0.0021(7) -0.0044(7) -0.0067(7)
C47 0.0192(8) 0.0184(8) 0.0215(8) -0.0009(6) -0.0032(7) -0.0077(6)
C48 0.0292(10) 0.0239(9) 0.0228(9) 0.0023(7) -0.0010(8) -0.0115(8)
C49 0.0322(11) 0.0293(10) 0.0333(11) -0.0055(9) 0.0070(9) -0.0123(9)
C50 0.0285(10) 0.0290(10) 0.0333(11) 0.0012(8) 0.0008(9) -0.0151(8)
C51 0.0408(13) 0.0409(13) 0.0255(11) 0.0046(9) 0.0016(9) -0.0172(10)
C52 0.0267(10) 0.0266(10) 0.0400(12) 0.0019(9) -0.0137(9) -0.0059(8)
C53 0.0238(9) 0.0225(8) 0.0210(9) -0.0006(7) -0.0012(7) -0.0085(7)
C54 0.0405(12) 0.0236(9) 0.0254(10) 0.0027(8) -0.0021(9) -0.0126(9)
C55 0.0348(12) 0.0377(12) 0.0279(11) -0.0029(9) 0.0077(9) -0.0084(10)
C56 0.0380(12) 0.0367(12) 0.0250(10) 0.0035(9) -0.0108(9) -0.0146(10)
 
_geom_special_details
;
 All esds (except the esd in the dihedral angle between two l.s. planes)
 are estimated using the full covariance matrix.  The cell esds are taken
 into account individually in the estimation of esds in distances, angles
 and torsion angles; correlations between esds in cell parameters are only
 used when they are defined by crystal symmetry.  An approximate (isotropic)
 treatment of cell esds is used for estimating esds involving l.s. planes.
;
 
loop_
 _geom_bond_atom_site_label_1
 _geom_bond_atom_site_label_2
 _geom_bond_distance
 _geom_bond_site_symmetry_2
 _geom_bond_publ_flag
Re1 N32 1.9898(17) . ?
Re1 N12 1.9952(15) . ?
Re1 N21 2.0658(16) . ?
Re1 N38 2.0675(17) . ?
Re1 N18 2.0763(16) . ?
Re1 N1 2.0776(15) . ?
N1 C2 1.365(2) . ?
N1 C6 1.381(2) . ?
C2 C3 1.380(3) . ?
C3 C4 1.394(3) . ?
C4 C5 1.375(3) . ?
C5 C6 1.401(2) . ?
C6 C7 1.445(3) . ?
C7 N12 1.386(2) . ?
C7 C8 1.388(3) . ?
C8 C9 1.386(3) . ?
C9 C10 1.400(3) . ?
C10 C11 1.384(3) . ?
C11 N12 1.382(2) . ?
C11 C13 1.451(2) . ?
C13 N18 1.380(2) . ?
C13 C14 1.397(2) . ?
C14 C15 1.381(3) . ?
C15 C16 1.392(3) . ?
C16 C17 1.378(3) . ?
C17 N18 1.364(2) . ?
N21 C22 1.366(3) . ?
N21 C26 1.375(2) . ?
C22 C23 1.377(3) . ?
C23 C24 1.398(3) . ?
C24 C25 1.371(4) . ?
C25 C26 1.405(3) . ?
C26 C27 1.443(3) . ?
C27 N32 1.385(3) . ?
C27 C28 1.392(3) . ?
C28 C29 1.384(4) . ?
C29 C30 1.392(4) . ?
C30 C31 1.390(3) . ?
C31 N32 1.383(3) . ?
C31 C33 1.447(3) . ?
C33 N38 1.381(2) . ?
C33 C34 1.399(3) . ?
C34 C35 1.374(3) . ?
C35 C36 1.398(3) . ?
C36 C37 1.375(3) . ?
C37 N38 1.365(2) . ?
O41 C42 1.289(2) . ?
C42 C47 1.449(3) . ?
C42 C43 1.452(3) . ?
C43 C44 1.392(3) . ?
C43 C48 1.538(3) . ?
C44 C45 1.390(3) . ?
C45 C46 1.401(3) . ?
C45 C52 1.514(3) . ?
C46 C47 1.391(3) . ?
C47 C53 1.545(3) . ?
C48 C51 1.535(3) . ?
C48 C50 1.541(3) . ?
C48 C49 1.543(3) . ?
C53 C55 1.527(3) . ?
C53 C56 1.538(3) . ?
C53 C54 1.539(3) . ?
 
loop_
 _geom_angle_atom_site_label_1
 _geom_angle_atom_site_label_2
 _geom_angle_atom_site_label_3
 _geom_angle
 _geom_angle_site_symmetry_1
 _geom_angle_site_symmetry_3
 _geom_angle_publ_flag
N32 Re1 N12 178.26(6) . . ?
N32 Re1 N21 77.17(7) . . ?
N12 Re1 N21 101.86(6) . . ?
N32 Re1 N38 76.98(7) . . ?
N12 Re1 N38 103.98(6) . . ?
N21 Re1 N38 154.15(7) . . ?
N32 Re1 N18 101.63(6) . . ?
N12 Re1 N18 76.86(6) . . ?
N21 Re1 N18 88.83(6) . . ?
N38 Re1 N18 96.17(6) . . ?
N32 Re1 N1 104.73(6) . . ?
N12 Re1 N1 76.78(6) . . ?
N21 Re1 N1 96.67(6) . . ?
N38 Re1 N1 90.03(6) . . ?
N18 Re1 N1 153.64(6) . . ?
C2 N1 C6 117.74(16) . . ?
C2 N1 Re1 125.94(13) . . ?
C6 N1 Re1 116.31(12) . . ?
N1 C2 C3 122.41(19) . . ?
C2 C3 C4 119.63(19) . . ?
C5 C4 C3 119.10(19) . . ?
C4 C5 C6 119.76(19) . . ?
N1 C6 C5 121.34(17) . . ?
N1 C6 C7 114.43(15) . . ?
C5 C6 C7 124.22(17) . . ?
N12 C7 C8 120.63(16) . . ?
N12 C7 C6 111.76(15) . . ?
C8 C7 C6 127.60(16) . . ?
C9 C8 C7 119.74(16) . . ?
C8 C9 C10 120.09(17) . . ?
C11 C10 C9 118.87(17) . . ?
N12 C11 C10 121.53(15) . . ?
N12 C11 C13 111.87(15) . . ?
C10 C11 C13 126.57(16) . . ?
C11 N12 C7 118.98(15) . . ?
C11 N12 Re1 120.44(11) . . ?
C7 N12 Re1 120.57(12) . . ?
N18 C13 C14 121.54(16) . . ?
N18 C13 C11 114.20(15) . . ?
C14 C13 C11 124.22(17) . . ?
C15 C14 C13 119.16(18) . . ?
C14 C15 C16 119.59(18) . . ?
C17 C16 C15 119.37(18) . . ?
N18 C17 C16 122.39(18) . . ?
C17 N18 C13 117.93(16) . . ?
C17 N18 Re1 125.75(13) . . ?
C13 N18 Re1 116.26(11) . . ?
C22 N21 C26 118.32(17) . . ?
C22 N21 Re1 124.99(13) . . ?
C26 N21 Re1 116.43(14) . . ?
N21 C22 C23 122.4(2) . . ?
C22 C23 C24 119.5(2) . . ?
C25 C24 C23 118.7(2) . . ?
C24 C25 C26 120.6(2) . . ?
N21 C26 C25 120.4(2) . . ?
N21 C26 C27 114.32(17) . . ?
C25 C26 C27 125.19(19) . . ?
N32 C27 C28 120.0(2) . . ?
N32 C27 C26 112.07(17) . . ?
C28 C27 C26 127.8(2) . . ?
C29 C28 C27 120.0(2) . . ?
C28 C29 C30 120.3(2) . . ?
C31 C30 C29 119.2(2) . . ?
N32 C31 C30 120.8(2) . . ?
N32 C31 C33 112.25(17) . . ?
C30 C31 C33 127.0(2) . . ?
C31 N32 C27 119.75(17) . . ?
C31 N32 Re1 120.21(13) . . ?
C27 N32 Re1 119.98(14) . . ?
N38 C33 C34 121.08(18) . . ?
N38 C33 C31 113.61(18) . . ?
C34 C33 C31 125.30(19) . . ?
C35 C34 C33 120.2(2) . . ?
C34 C35 C36 118.8(2) . . ?
C37 C36 C35 119.53(19) . . ?
N38 C37 C36 122.71(19) . . ?
C37 N38 C33 117.68(17) . . ?
C37 N38 Re1 125.46(13) . . ?
C33 N38 Re1 116.78(13) . . ?
O41 C42 C47 121.64(18) . . ?
O41 C42 C43 121.28(17) . . ?
C47 C42 C43 117.08(17) . . ?
C44 C43 C42 119.71(18) . . ?
C44 C43 C48 120.15(18) . . ?
C42 C43 C48 120.04(18) . . ?
C45 C44 C43 122.93(19) . . ?
C44 C45 C46 117.46(18) . . ?
C44 C45 C52 121.1(2) . . ?
C46 C45 C52 121.40(19) . . ?
C47 C46 C45 123.20(18) . . ?
C46 C47 C42 119.30(18) . . ?
C46 C47 C53 120.78(17) . . ?
C42 C47 C53 119.82(17) . . ?
C51 C48 C43 112.88(19) . . ?
C51 C48 C50 107.37(17) . . ?
C43 C48 C50 107.79(17) . . ?
C51 C48 C49 106.81(19) . . ?
C43 C48 C49 112.27(16) . . ?
C50 C48 C49 109.58(19) . . ?
C55 C53 C56 107.10(18) . . ?
C55 C53 C54 107.77(17) . . ?
C56 C53 C54 108.76(18) . . ?
C55 C53 C47 112.63(18) . . ?
C56 C53 C47 111.55(16) . . ?
C54 C53 C47 108.89(16) . . ?
 
_refine_diff_density_max    2.579
_refine_diff_density_min   -0.838
_refine_diff_density_rms    0.104


_shelxl_version_number 2013-2

_shelx_res_file
;
TITL [(tpy)2Re](bht-) * thf ; bht- = 2,6-di-t-butyl-4-methylphenolate
TITL 8618 Mei Wang in P-1 ; WGT-WM-056-01 ; thf removed with SQUEEZE
CELL 0.71073   9.3239  15.0576  15.723  84.263  80.615  73.730
ZERR    2.00   0.0009   0.0015   0.002   0.002   0.002   0.002
LATT 1
SFAC C H N RE O
UNIT 120 88 24 4 4

TEMP -173

SIZE 0.04 0.227 0.554

OMIT -3 64

ACTA

L.S. 8
BOND
FMAP 2
PLAN 40

ABIN
WGHT    0.029200    0.726100
FVAR       0.07888   0.58290
RE1   4    0.586354   -0.622886    0.263202    11.00000    0.01724    0.01497 =
         0.01535   -0.00208   -0.00274   -0.00668
N1    3    0.784855   -0.591235    0.206637    11.00000    0.01891    0.01966 =
         0.01642   -0.00339   -0.00215   -0.00684
C2    1    0.922794   -0.653276    0.189496    11.00000    0.02205    0.02322 =
         0.02707   -0.00524   -0.00088   -0.00634
AFIX  43
H2    2    0.931524   -0.717242    0.203543    11.00000   -1.20000
AFIX   0
C3    1    1.050043   -0.626478    0.152504    11.00000    0.01933    0.03003 =
         0.03485   -0.00700    0.00198   -0.00562
AFIX  43
H3    2    1.143915   -0.671639    0.140472    11.00000   -1.20000
AFIX   0
C4    1    1.040046   -0.532750    0.132893    11.00000    0.02192    0.03660 =
         0.03195   -0.00353    0.00134   -0.01291
AFIX  43
H4    2    1.126842   -0.513394    0.107541    11.00000   -1.20000
AFIX   0
C5    1    0.902886   -0.468736    0.150742    11.00000    0.02207    0.02691 =
         0.02581   -0.00084   -0.00139   -0.01223
AFIX  43
H5    2    0.894585   -0.404534    0.138749    11.00000   -1.20000
AFIX   0
C6    1    0.775361   -0.498528    0.186692    11.00000    0.02109    0.01981 =
         0.01601   -0.00209   -0.00259   -0.00948
C7    1    0.624944   -0.437587    0.204113    11.00000    0.01846    0.02003 =
         0.01597   -0.00190   -0.00303   -0.01020
C8    1    0.579942   -0.342047    0.189155    11.00000    0.02393    0.01956 =
         0.01985   -0.00016   -0.00323   -0.01231
AFIX  43
H8    2    0.652968   -0.308831    0.169089    11.00000   -1.20000
AFIX   0
C9    1    0.428013   -0.295300    0.203614    11.00000    0.02469    0.01687 =
         0.02376    0.00017   -0.00482   -0.00828
AFIX  43
H9    2    0.396617   -0.230120    0.192098    11.00000   -1.20000
AFIX   0
C10   1    0.320822   -0.344007    0.235155    11.00000    0.02024    0.01815 =
         0.01963    0.00005   -0.00344   -0.00653
AFIX  43
H10   2    0.216276   -0.312749    0.243526    11.00000   -1.20000
AFIX   0
C11   1    0.369735   -0.438479    0.253939    11.00000    0.01843    0.01730 =
         0.01414   -0.00056   -0.00373   -0.00792
N12   3    0.520609   -0.486044    0.238644    11.00000    0.01672    0.01903 =
         0.01141   -0.00257   -0.00158   -0.00814
C13   1    0.276878   -0.498760    0.292905    11.00000    0.01846    0.01827 =
         0.01439   -0.00062   -0.00493   -0.00829
C14   1    0.120654   -0.469062    0.316407    11.00000    0.01847    0.02216 =
         0.02026    0.00127   -0.00503   -0.00720
AFIX  43
H14   2    0.067088   -0.406660    0.304011    11.00000   -1.20000
AFIX   0
C15   1    0.045051   -0.531553    0.357887    11.00000    0.01849    0.02786 =
         0.02964    0.00458   -0.00207   -0.00937
AFIX  43
H15   2   -0.060951   -0.512203    0.375179    11.00000   -1.20000
AFIX   0
C16   1    0.125102   -0.623059    0.374206    11.00000    0.02358    0.02537 =
         0.03115    0.00953   -0.00340   -0.01140
AFIX  43
H16   2    0.074326   -0.666589    0.402911    11.00000   -1.20000
AFIX   0
C17   1    0.278703   -0.649912    0.348332    11.00000    0.02206    0.01999 =
         0.02601    0.00467   -0.00342   -0.00867
AFIX  43
H17   2    0.332146   -0.712783    0.358723    11.00000   -1.20000
AFIX   0
N18   3    0.356793   -0.589534    0.308358    11.00000    0.02032    0.01807 =
         0.01606    0.00100   -0.00386   -0.00855
N21   3    0.542560   -0.671883    0.154722    11.00000    0.02146    0.02374 =
         0.01675   -0.00510   -0.00010   -0.01079
C22   1    0.477119   -0.617637    0.088954    11.00000    0.02882    0.02862 =
         0.01922   -0.00407   -0.00434   -0.01003
AFIX  43
H22   2    0.457544   -0.552278    0.089515    11.00000   -1.20000
AFIX   0
C23   1    0.438497   -0.654193    0.021900    11.00000    0.03695    0.04092 =
         0.01975   -0.00616   -0.00528   -0.01489
AFIX  43
H23   2    0.392000   -0.614407   -0.022444    11.00000   -1.20000
AFIX   0
C24   1    0.468186   -0.750274    0.019525    11.00000    0.03989    0.04273 =
         0.02288   -0.01169   -0.00056   -0.02388
AFIX  43
H24   2    0.443044   -0.776702   -0.026514    11.00000   -1.20000
AFIX   0
C25   1    0.534294   -0.805622    0.084933    11.00000    0.03709    0.03142 =
         0.02770   -0.01154    0.00269   -0.02044
AFIX  43
H25   2    0.556095   -0.871070    0.083955    11.00000   -1.20000
AFIX   0
C26   1    0.570077   -0.766372    0.153402    11.00000    0.02369    0.02508 =
         0.02400   -0.00696    0.00041   -0.01348
C27   1    0.630309   -0.817482    0.228184    11.00000    0.02847    0.01874 =
         0.03120   -0.00573   -0.00200   -0.01020
C28   1    0.663683   -0.912722    0.247165    11.00000    0.04367    0.02090 =
         0.04578   -0.00711   -0.00527   -0.01307
AFIX  43
H28   2    0.654528   -0.952522    0.206313    11.00000   -1.20000
AFIX   0
C29   1    0.710193   -0.949477    0.325503    11.00000    0.04620    0.01848 =
         0.05493    0.00126   -0.01051   -0.00800
AFIX  43
H29   2    0.731149   -1.014394    0.338724    11.00000   -1.20000
AFIX   0
C30   1    0.726395   -0.891673    0.385029    11.00000    0.03786    0.02324 =
         0.04057    0.00387   -0.00804   -0.00683
AFIX  43
H30   2    0.757586   -0.916677    0.439030    11.00000   -1.20000
AFIX   0
C31   1    0.696343   -0.796897    0.364431    11.00000    0.02649    0.01929 =
         0.02887    0.00042   -0.00596   -0.00671
N32   3    0.645722   -0.759570    0.287232    11.00000    0.01916    0.02075 =
         0.02389   -0.00236   -0.00250   -0.00797
C33   1    0.708572   -0.726715    0.417265    11.00000    0.02030    0.02213 =
         0.02331    0.00156   -0.00411   -0.00629
C34   1    0.767943   -0.743949    0.495312    11.00000    0.02645    0.03037 =
         0.02460    0.00470   -0.00801   -0.00648
AFIX  43
H34   2    0.803095   -0.805873    0.517800    11.00000   -1.20000
AFIX   0
C35   1    0.775542   -0.671560    0.539516    11.00000    0.02595    0.04072 =
         0.01948    0.00217   -0.00715   -0.00988
AFIX  43
H35   2    0.816833   -0.682816    0.592201    11.00000   -1.20000
AFIX   0
C36   1    0.721420   -0.581015    0.505584    11.00000    0.02705    0.03323 =
         0.01871   -0.00464   -0.00479   -0.01129
AFIX  43
H36   2    0.724485   -0.529883    0.535416    11.00000   -1.20000
AFIX   0
C37   1    0.663740   -0.566511    0.428744    11.00000    0.02232    0.02353 =
         0.01798   -0.00295   -0.00368   -0.00743
AFIX  43
H37   2    0.627021   -0.504632    0.406533    11.00000   -1.20000
AFIX   0
N38   3    0.657053   -0.637370    0.383037    11.00000    0.01695    0.01863 =
         0.01866   -0.00167   -0.00254   -0.00569

O41   5    0.028577    0.268283   -0.242354    11.00000    0.02046    0.02853 =
         0.02930    0.00790   -0.00285   -0.00280
C42   1    0.147755    0.211641   -0.217373    11.00000    0.02004    0.01872 =
         0.02292    0.00146   -0.00344   -0.00748
C43   1    0.148784    0.174640   -0.128497    11.00000    0.02423    0.01991 =
         0.02223    0.00117   -0.00371   -0.01083
C44   1    0.283351    0.121384   -0.101661    11.00000    0.02918    0.02029 =
         0.02387    0.00222   -0.00898   -0.01116
AFIX  43
H44   2    0.282605    0.099688   -0.042783    11.00000   -1.20000
AFIX   0
C45   1    0.418820    0.098518   -0.157166    11.00000    0.02384    0.01748 =
         0.03029    0.00064   -0.01157   -0.00717
C46   1    0.415829    0.128178   -0.244358    11.00000    0.01903    0.01817 =
         0.02986   -0.00212   -0.00435   -0.00671
AFIX  43
H46   2    0.506358    0.110145   -0.283623    11.00000   -1.20000
AFIX   0
C47   1    0.286722    0.182763   -0.276246    11.00000    0.01916    0.01836 =
         0.02153   -0.00091   -0.00316   -0.00767
C48   1    0.000166    0.189194   -0.065932    11.00000    0.02918    0.02389 =
         0.02281    0.00231   -0.00099   -0.01148
C49   1   -0.079364    0.292733   -0.053981    11.00000    0.03218    0.02928 =
         0.03334   -0.00551    0.00701   -0.01229
AFIX 137
H49A  2   -0.177399    0.298888   -0.017860    11.00000   -1.50000
H49B  2   -0.094454    0.324895   -0.110493    11.00000   -1.50000
H49C  2   -0.016747    0.320172   -0.025999    11.00000   -1.50000
AFIX   0
C50   1   -0.103864    0.143938   -0.102883    11.00000    0.02851    0.02896 =
         0.03326    0.00120    0.00081   -0.01510
AFIX 137
H50A  2   -0.057918    0.076982   -0.104605    11.00000   -1.50000
H50B  2   -0.117813    0.170413   -0.161449    11.00000   -1.50000
H50C  2   -0.201999    0.155648   -0.066086    11.00000   -1.50000
AFIX   0
C51   1    0.022148    0.143379    0.024405    11.00000    0.04083    0.04093 =
         0.02551    0.00458    0.00164   -0.01719
AFIX 137
H51A  2    0.066053    0.076474    0.020163    11.00000   -1.50000
H51B  2   -0.075671    0.154853    0.061512    11.00000   -1.50000
H51C  2    0.090099    0.169555    0.049228    11.00000   -1.50000
AFIX   0
C52   1    0.563232    0.041875   -0.124764    11.00000    0.02668    0.02657 =
         0.03996    0.00195   -0.01370   -0.00590
AFIX 137
H52A  2    0.545670    0.033946   -0.061640    11.00000   -1.50000
H52B  2    0.642261    0.074042   -0.142239    11.00000   -1.50000
H52C  2    0.595218   -0.019017   -0.149445    11.00000   -1.50000
AFIX   0
C53   1    0.292435    0.217420   -0.372263    11.00000    0.02380    0.02247 =
         0.02100   -0.00057   -0.00121   -0.00850
C54   1    0.282073    0.321645   -0.379265    11.00000    0.04049    0.02362 =
         0.02543    0.00269   -0.00214   -0.01258
AFIX 137
H54A  2    0.374062    0.331022   -0.363563    11.00000   -1.50000
H54B  2    0.194403    0.354144   -0.340004    11.00000   -1.50000
H54C  2    0.271157    0.346140   -0.438688    11.00000   -1.50000
AFIX   0
C55   1    0.438439    0.168292   -0.427433    11.00000    0.03475    0.03769 =
         0.02792   -0.00295    0.00771   -0.00844
AFIX 137
H55A  2    0.524296    0.181715   -0.407820    11.00000   -1.50000
H55B  2    0.434347    0.190338   -0.488011    11.00000   -1.50000
H55C  2    0.450376    0.101294   -0.421874    11.00000   -1.50000
AFIX   0
C56   1    0.161205    0.202487   -0.411876    11.00000    0.03804    0.03670 =
         0.02505    0.00347   -0.01077   -0.01461
AFIX 137
H56A  2    0.161690    0.231160   -0.470652    11.00000   -1.50000
H56B  2    0.065377    0.230866   -0.376600    11.00000   -1.50000
H56C  2    0.172946    0.135921   -0.413614    11.00000   -1.50000

AFIX   0
HKLF 4

REM  8618 Mei Wang in P-1 ; WGT-WM-056-01 ; thf removed with SQUEEZE
REM R1 =  0.0242 for   12914 Fo > 4sig(Fo)  and  0.0287 for all   14159 data
REM    486 parameters refined using      0 restraints

END

WGHT      0.0292      0.7260

REM Highest difference peak  2.579,  deepest hole -0.838,  1-sigma level  0.104
Q1    1   0.6159 -0.6734  0.2668  11.00000  0.05    2.58
Q2    1   0.5352 -0.6136  0.2300  11.00000  0.05    1.55
Q3    1   0.5482 -0.5708  0.2735  11.00000  0.05    1.53
Q4    1   0.5631 -0.5646  0.2332  11.00000  0.05    1.35
Q5    1   0.6546 -0.6306  0.2990  11.00000  0.05    0.97
Q6    1   0.6335 -0.5666  0.2771  11.00000  0.05    0.96
Q7    1   0.5303 -0.6406  0.2864  11.00000  0.05    0.92
Q8    1   0.5690 -0.7091  0.3096  11.00000  0.05    0.86
Q9    1   0.8033 -0.8985  0.3539  11.00000  0.05    0.82
Q10   1   0.6621 -0.7276  0.2623  11.00000  0.05    0.72
Q11   1   0.7966 -0.9544  0.2905  11.00000  0.05    0.69
Q12   1   0.7401 -0.6894  0.2515  11.00000  0.05    0.67
Q13   1   0.6149  0.0271 -0.1776  11.00000  0.05    0.67
Q14   1   0.3357  0.1011 -0.1351  11.00000  0.05    0.66
Q15   1   0.7427 -0.9174  0.2208  11.00000  0.05    0.66
Q16   1   0.3245 -0.5360  0.3069  11.00000  0.05    0.65
Q17   1   0.3149 -0.4692  0.2689  11.00000  0.05    0.65
Q18   1   0.6993 -0.7119  0.3013  11.00000  0.05    0.61
Q19   1   0.6054 -0.6127  0.3319  11.00000  0.05    0.60
Q20   1   0.6966 -0.6117  0.2338  11.00000  0.05    0.60
Q21   1   0.5330 -0.6945  0.2141  11.00000  0.05    0.60
Q22   1   0.4336 -0.5566  0.2771  11.00000  0.05    0.59
Q23   1   0.6772 -0.6791  0.4024  11.00000  0.05    0.59
Q24   1  -0.2391  0.1397 -0.2035  11.00000  0.05    0.59
Q25   1   0.6596 -0.7828  0.2510  11.00000  0.05    0.58
Q26   1   0.2181  0.1427 -0.1347  11.00000  0.05    0.58
Q27   1   0.5748 -0.4616  0.2259  11.00000  0.05    0.57
Q28   1   0.6171 -0.3896  0.1894  11.00000  0.05    0.57
Q29   1   0.2122  0.1956 -0.2446  11.00000  0.05    0.55
Q30   1   0.5594 -0.7248  0.1526  11.00000  0.05    0.54
Q31   1   0.3840 -0.3222  0.2143  11.00000  0.05    0.53
Q32   1   0.4437 -0.6237  0.2993  11.00000  0.05    0.53
Q33   1   0.2078 -0.4888  0.3195  11.00000  0.05    0.53
Q34   1   0.6983 -0.8341  0.3774  11.00000  0.05    0.53
Q35   1  -0.0185  0.2426 -0.0612  11.00000  0.05    0.53
Q36   1   0.7854 -0.5458  0.2074  11.00000  0.05    0.52
Q37   1   0.5230 -0.6192  0.1811  11.00000  0.05    0.52
Q38   1   0.6413 -0.8599  0.2428  11.00000  0.05    0.52
Q39   1   0.8970 -0.0539 -0.2725  11.00000  0.05    0.50
Q40   1   0.4709  0.0878 -0.2058  11.00000  0.05    0.50
;
_shelx_res_checksum   67593

#===END

 
data_6
 
_audit_creation_method            SHELXL-2013
_audit_creation_date              2014-03-13
_audit_block_code                 WGT-WM-063-01
_chemical_name_systematic
;
 ?
;
_chemical_name_common             ?
_chemical_melting_point           ?
_chemical_formula_moiety          
 'C30 H22 N6 Re, Cl, 2.5(C H2 Cl2)' 
_chemical_formula_sum
 'C32.50 H27 Cl6 N6 Re' 
_chemical_formula_weight          900.50

loop_
 _atom_type_symbol
 _atom_type_description
 _atom_type_scat_dispersion_real
 _atom_type_scat_dispersion_imag
 _atom_type_scat_source
 'C'  'C'   0.0033   0.0016
 'International Tables Vol C Tables 4.2.6.8 and 6.1.1.4'
 'H'  'H'   0.0000   0.0000
 'International Tables Vol C Tables 4.2.6.8 and 6.1.1.4'
 'N'  'N'   0.0061   0.0033
 'International Tables Vol C Tables 4.2.6.8 and 6.1.1.4'
 'Re'  'Re'  -1.0185   7.2310
 'International Tables Vol C Tables 4.2.6.8 and 6.1.1.4'
 'Cl'  'Cl'   0.1484   0.1585
 'International Tables Vol C Tables 4.2.6.8 and 6.1.1.4'
 
_space_group_crystal_system       monoclinic
_space_group_IT_number            14
_space_group_name_H-M_alt         'P 21/n'
_space_group_name_Hall            '-P 2yn'
 
_shelx_space_group_comment
;
The symmetry employed for this shelxl refinement is uniquely defined
by the following loop, which should always be used as a source of
symmetry information in preference to the above space-group names.
They are only intended as comments.
;
 
loop_
 _space_group_symop_operation_xyz
 'x, y, z'
 '-x+1/2, y+1/2, -z+1/2'
 '-x, -y, -z'
 'x-1/2, -y-1/2, z-1/2'
 
_cell_length_a                    16.5197(9)
_cell_length_b                    21.126(2)
_cell_length_c                    20.0004(14)
_cell_angle_alpha                 90
_cell_angle_beta                  101.754(5)
_cell_angle_gamma                 90
_cell_volume                      6833.7(9)
_cell_formula_units_Z             8
_cell_measurement_temperature     100(2)
_cell_measurement_reflns_used     212236
_cell_measurement_theta_min       2.6289
_cell_measurement_theta_max       33.1

loop_
 _exptl_crystal_face_index_h
 _exptl_crystal_face_index_k
 _exptl_crystal_face_index_l
 _exptl_crystal_face_perp_dist
   -1.00    0.00    1.00    0.0400
    1.00    0.00   -1.00    0.0400
   -2.00   -3.00   -1.00    0.0800
    2.00    3.00    1.00    0.0800
    1.00   -2.00    1.00    0.1100
   -1.00    2.00   -1.00    0.0800
    2.00    0.00    1.00    0.0700
   -2.00    0.00   -1.00    0.0900
   -1.00    1.00    2.00    0.0450
    1.00   -1.00   -2.00    0.0400

_exptl_crystal_description        prism
_exptl_crystal_colour             black
_exptl_crystal_size_max           0.16
_exptl_crystal_size_mid           0.09
_exptl_crystal_size_min           0.08
_exptl_crystal_density_meas       ? 
_exptl_crystal_density_method     ?              
_exptl_crystal_density_diffrn     1.751          
_exptl_crystal_F_000              3528
_exptl_transmission_factor_min    ?                                             
_exptl_transmission_factor_max    ?                                             
_exptl_absorpt_coefficient_mu     4.059
_shelx_estimated_absorpt_T_min    0.563
_shelx_estimated_absorpt_T_max    0.737
_exptl_absorpt_correction_type    gaussian
_exptl_absorpt_process_details    'SADABS (Bruker AXS, 2012)' 
_exptl_absorpt_correction_T_min   0.57938 
_exptl_absorpt_correction_T_max   0.74692 
 
_exptl_special_details
;
 ?
;
 
_diffrn_ambient_temperature       100(2)
_diffrn_radiation_wavelength      0.71073
_diffrn_radiation_type            MoK\a
_diffrn_source                    '0.2 x 2mm^2^ focus rotating anode'
_diffrn_radiation_monochromator   'Incoatec Helios focusing multilayer optics'
_diffrn_measurement_device_type   'Bruker AXS Enraf-Nonius KappaCCD'
_diffrn_measurement_method        'CCD \f- and \w-scans'
_diffrn_detector_area_resol_mean  18.02
_diffrn_reflns_number             194722
_diffrn_reflns_av_unetI/netI      0.0240
_diffrn_reflns_av_R_equivalents   0.0440
_diffrn_reflns_limit_h_min        -25
_diffrn_reflns_limit_h_max        25
_diffrn_reflns_limit_k_min        -32
_diffrn_reflns_limit_k_max        32
_diffrn_reflns_limit_l_min        -30
_diffrn_reflns_limit_l_max        30
_diffrn_reflns_theta_min          2.631
_diffrn_reflns_theta_max          33.148
_diffrn_reflns_theta_full         25.242
_diffrn_measured_fraction_theta_max   0.996
_diffrn_measured_fraction_theta_full  0.998
_diffrn_reflns_Laue_measured_fraction_max    0.996
_diffrn_reflns_Laue_measured_fraction_full   0.998
_diffrn_reflns_point_group_measured_fraction_max   0.996
_diffrn_reflns_point_group_measured_fraction_full  0.998
_reflns_number_total              26005
_reflns_number_gt                 20708
_reflns_threshold_expression      'I > 2\s(I)'
_reflns_Friedel_coverage          0.000
_reflns_Friedel_fraction_max      .
_reflns_Friedel_fraction_full     .
 
_reflns_special_details
;
 Reflections were merged by SHELXL according to the crystal
 class for the calculation of statistics and refinement.
 
 _reflns_Friedel_fraction is defined as the number of unique
 Friedel pairs measured divided by the number that would be
 possible theoretically, ignoring centric projections and
 systematic absences.
;
 
_computing_data_collection        'DATCOL (Bruker AXS, 2006)'
_computing_cell_refinement        'REVALCCD V. 1.6, 2008'
_computing_data_reduction         'REVALCCD V. 1.6, 2008'         
_computing_structure_solution     'SHELXS (Sheldrick, 2013)'
_computing_structure_refinement   'SHELXL (Sheldrick, 2013)'
_computing_molecular_graphics     ?
_computing_publication_material   ?
 
_refine_special_details
;
 ?
;
_refine_ls_structure_factor_coef  Fsqd
_refine_ls_matrix_type            full
_refine_ls_weighting_scheme       calc
_refine_ls_weighting_details
;
 w=1/[\s^2^(Fo^2^)+(0.0316P)^2^+21.9544P]
 where P=(Fo^2^+2Fc^2^)/3
;
_atom_sites_solution_primary      ?
_atom_sites_solution_secondary    ?
_atom_sites_solution_hydrogens    geom
_refine_ls_hydrogen_treatment     constr
_refine_ls_extinction_method      none
_refine_ls_extinction_coef        .
_refine_ls_number_reflns          26005
_refine_ls_number_parameters      841
_refine_ls_number_restraints      10
_refine_ls_R_factor_all           0.0484
_refine_ls_R_factor_gt            0.0331
_refine_ls_wR_factor_ref          0.0941
_refine_ls_wR_factor_gt           0.0807
_refine_ls_goodness_of_fit_ref    1.097
_refine_ls_restrained_S_all       1.097
_refine_ls_shift/su_max           0.005
_refine_ls_shift/su_mean          0.000
 
loop_
 _atom_site_label
 _atom_site_type_symbol
 _atom_site_fract_x
 _atom_site_fract_y
 _atom_site_fract_z
 _atom_site_U_iso_or_equiv
 _atom_site_adp_type
 _atom_site_occupancy
 _atom_site_site_symmetry_order  
 _atom_site_calc_flag
 _atom_site_refinement_flags_posn
 _atom_site_refinement_flags_adp
 _atom_site_refinement_flags_occupancy
 _atom_site_disorder_assembly
 _atom_site_disorder_group
Re1 Re 0.20077(2) 0.55615(2) 0.84314(2) 0.02024(3) Uani 1 1 d . . . . .
Re2 Re 0.77105(2) 0.55566(2) 0.56534(2) 0.01760(3) Uani 1 1 d . . . . .
Cl1 Cl 0.49981(5) 0.75036(4) 0.72053(5) 0.03025(15) Uani 1 1 d . . . . .
Cl2 Cl 0.50762(5) 0.33968(4) 0.80841(6) 0.0399(2) Uani 1 1 d . . . . .
N1 N 0.14786(15) 0.49698(12) 0.76413(13) 0.0220(4) Uani 1 1 d . . . . .
C2 C 0.1285(2) 0.51351(17) 0.69694(17) 0.0310(7) Uani 1 1 d . . . . .
H2 H 0.1401 0.5554 0.6844 0.037 Uiso 1 1 calc R U . . .
C3 C 0.0932(3) 0.4724(2) 0.64704(19) 0.0387(8) Uani 1 1 d . . . . .
H3 H 0.0820 0.4855 0.6006 0.046 Uiso 1 1 calc R U . . .
C4 C 0.0736(3) 0.41148(19) 0.6637(2) 0.0388(8) Uani 1 1 d . . . . .
H4 H 0.0482 0.3827 0.6293 0.047 Uiso 1 1 calc R U . . .
C5 C 0.0918(2) 0.39335(17) 0.73155(19) 0.0326(7) Uani 1 1 d . . . . .
H5 H 0.0788 0.3518 0.7441 0.039 Uiso 1 1 calc R U . . .
C6 C 0.1292(2) 0.43623(15) 0.78167(17) 0.0248(6) Uani 1 1 d . . . . .
C7 C 0.1495(2) 0.42336(15) 0.85421(17) 0.0261(6) Uani 1 1 d . . . . .
C8 C 0.1361(2) 0.36714(17) 0.8868(2) 0.0344(7) Uani 1 1 d . . . . .
H8 H 0.1118 0.3317 0.8610 0.041 Uiso 1 1 calc R U . . .
C9 C 0.1587(3) 0.36352(19) 0.9576(2) 0.0398(8) Uani 1 1 d . . . . .
H9 H 0.1497 0.3256 0.9804 0.048 Uiso 1 1 calc R U . . .
C10 C 0.1946(3) 0.41545(19) 0.9949(2) 0.0372(8) Uani 1 1 d . . . . .
H10 H 0.2098 0.4130 1.0432 0.045 Uiso 1 1 calc R U . . .
C11 C 0.2084(2) 0.47119(17) 0.96157(17) 0.0289(6) Uani 1 1 d . . . . .
N12 N 0.18520(16) 0.47543(12) 0.89103(13) 0.0236(5) Uani 1 1 d . . . . .
C13 C 0.2459(2) 0.52870(18) 0.99090(17) 0.0295(6) Uani 1 1 d . . . . .
C14 C 0.2802(2) 0.5373(2) 1.06128(19) 0.0378(8) Uani 1 1 d . . . . .
H14 H 0.2787 0.5039 1.0928 0.045 Uiso 1 1 calc R U . . .
C15 C 0.3157(3) 0.5947(2) 1.0835(2) 0.0455(10) Uani 1 1 d . . . . .
H15 H 0.3393 0.6011 1.1305 0.055 Uiso 1 1 calc R U . . .
C16 C 0.3166(3) 0.6429(2) 1.0366(2) 0.0450(10) Uani 1 1 d . . . . .
H16 H 0.3410 0.6825 1.0513 0.054 Uiso 1 1 calc R U . . .
C17 C 0.2820(2) 0.63311(19) 0.9686(2) 0.0365(8) Uani 1 1 d . . . . .
H17 H 0.2823 0.6669 0.9373 0.044 Uiso 1 1 calc R U . . .
N18 N 0.24746(17) 0.57667(14) 0.94470(14) 0.0268(5) Uani 1 1 d . . . . .
N21 N 0.08878(16) 0.60193(13) 0.83890(14) 0.0243(5) Uani 1 1 d . . . . .
C22 C 0.0244(2) 0.57943(18) 0.86488(18) 0.0305(6) Uani 1 1 d . . . . .
H22 H 0.0312 0.5406 0.8893 0.037 Uiso 1 1 calc R U . . .
C23 C -0.0502(2) 0.6106(2) 0.8572(2) 0.0353(7) Uani 1 1 d . . . . .
H23 H -0.0936 0.5934 0.8762 0.042 Uiso 1 1 calc R U . . .
C24 C -0.0617(2) 0.6679(2) 0.8213(2) 0.0345(7) Uani 1 1 d . . . . .
H24 H -0.1129 0.6898 0.8152 0.041 Uiso 1 1 calc R U . . .
C25 C 0.0035(2) 0.69197(18) 0.79487(17) 0.0292(6) Uani 1 1 d . . . . .
H25 H -0.0026 0.7309 0.7707 0.035 Uiso 1 1 calc R U . . .
C26 C 0.07799(18) 0.65865(15) 0.80398(15) 0.0235(5) Uani 1 1 d . . . . .
C27 C 0.14938(18) 0.67893(14) 0.77751(15) 0.0213(5) Uani 1 1 d . . . . .
C28 C 0.15662(19) 0.73371(15) 0.74086(16) 0.0241(5) Uani 1 1 d . . . . .
H28 H 0.1119 0.7628 0.7309 0.029 Uiso 1 1 calc R U . . .
C29 C 0.2300(2) 0.74581(15) 0.71873(17) 0.0266(6) Uani 1 1 d . . . . .
H29 H 0.2355 0.7835 0.6941 0.032 Uiso 1 1 calc R U . . .
C30 C 0.29490(19) 0.70273(14) 0.73276(16) 0.0240(5) Uani 1 1 d . . . . .
H30 H 0.3446 0.7103 0.7172 0.029 Uiso 1 1 calc R U . . .
C31 C 0.28606(17) 0.64801(13) 0.77016(15) 0.0202(5) Uani 1 1 d . . . . .
N32 N 0.21363(15) 0.63606(12) 0.79289(13) 0.0203(4) Uani 1 1 d . . . . .
C33 C 0.34557(18) 0.59780(13) 0.78821(15) 0.0210(5) Uani 1 1 d . . . . .
C34 C 0.42435(19) 0.59737(15) 0.77207(17) 0.0259(6) Uani 1 1 d . . . . .
H34 H 0.4423 0.6323 0.7489 0.031 Uiso 1 1 calc R U . . .
C35 C 0.4757(2) 0.54588(16) 0.7900(2) 0.0307(7) Uani 1 1 d . . . . .
H35 H 0.5289 0.5448 0.7788 0.037 Uiso 1 1 calc R U . . .
C36 C 0.4484(2) 0.49530(16) 0.8248(2) 0.0322(7) Uani 1 1 d . . . . .
H36 H 0.4829 0.4595 0.8374 0.039 Uiso 1 1 calc R U . . .
C37 C 0.3712(2) 0.49787(15) 0.84046(19) 0.0290(6) Uani 1 1 d . . . . .
H37 H 0.3537 0.4634 0.8644 0.035 Uiso 1 1 calc R U . . .
N38 N 0.31849(16) 0.54794(11) 0.82307(14) 0.0224(5) Uani 1 1 d . . . . .
N41 N 0.72142(15) 0.58002(12) 0.46518(13) 0.0220(4) Uani 1 1 d . . . . .
C42 C 0.6923(2) 0.63890(16) 0.44350(18) 0.0300(6) Uani 1 1 d . . . . .
H42 H 0.6966 0.6721 0.4760 0.036 Uiso 1 1 calc R U . . .
C43 C 0.6570(3) 0.65167(18) 0.3762(2) 0.0383(8) Uani 1 1 d . . . . .
H43 H 0.6371 0.6929 0.3630 0.046 Uiso 1 1 calc R U . . .
C44 C 0.6509(2) 0.60335(19) 0.32780(19) 0.0355(8) Uani 1 1 d . . . . .
H44 H 0.6280 0.6115 0.2811 0.043 Uiso 1 1 calc R U . . .
C45 C 0.6788(2) 0.54370(16) 0.34893(16) 0.0276(6) Uani 1 1 d . . . . .
H45 H 0.6745 0.5103 0.3166 0.033 Uiso 1 1 calc R U . . .
C46 C 0.71330(17) 0.53214(15) 0.41757(15) 0.0219(5) Uani 1 1 d . . . . .
C47 C 0.74069(17) 0.47076(14) 0.44604(15) 0.0213(5) Uani 1 1 d . . . . .
C48 C 0.73478(19) 0.41296(16) 0.41148(17) 0.0258(6) Uani 1 1 d . . . . .
H48 H 0.7148 0.4115 0.3635 0.031 Uiso 1 1 calc R U . . .
C49 C 0.7584(2) 0.35751(16) 0.44790(17) 0.0281(6) Uani 1 1 d . . . . .
H49 H 0.7533 0.3178 0.4251 0.034 Uiso 1 1 calc R U . . .
C50 C 0.78946(19) 0.36074(15) 0.51798(17) 0.0257(6) Uani 1 1 d . . . . .
H50 H 0.8057 0.3231 0.5431 0.031 Uiso 1 1 calc R U . . .
C51 C 0.79682(18) 0.41869(14) 0.55127(15) 0.0214(5) Uani 1 1 d . . . . .
N52 N 0.77175(14) 0.47387(11) 0.51560(12) 0.0191(4) Uani 1 1 d . . . . .
C53 C 0.82781(19) 0.43042(14) 0.62305(16) 0.0224(5) Uani 1 1 d . . . . .
C54 C 0.8615(2) 0.38426(16) 0.67078(17) 0.0290(6) Uani 1 1 d . . . . .
H54 H 0.8648 0.3415 0.6569 0.035 Uiso 1 1 calc R U . . .
C55 C 0.8900(2) 0.40117(18) 0.73835(19) 0.0348(7) Uani 1 1 d . . . . .
H55 H 0.9125 0.3702 0.7714 0.042 Uiso 1 1 calc R U . . .
C56 C 0.8853(3) 0.46414(19) 0.75712(18) 0.0361(8) Uani 1 1 d . . . . .
H56 H 0.9049 0.4767 0.8032 0.043 Uiso 1 1 calc R U . . .
C57 C 0.8520(2) 0.50830(17) 0.70864(17) 0.0299(6) Uani 1 1 d . . . . .
H57 H 0.8496 0.5512 0.7222 0.036 Uiso 1 1 calc R U . . .
N58 N 0.82232(16) 0.49291(12) 0.64189(13) 0.0223(5) Uani 1 1 d . . . . .
N61 N 0.65334(16) 0.55154(12) 0.58705(14) 0.0229(5) Uani 1 1 d . . . . .
C62 C 0.5996(2) 0.50234(17) 0.57180(19) 0.0302(6) Uani 1 1 d . . . . .
H62 H 0.6168 0.4656 0.5511 0.036 Uiso 1 1 calc R U . . .
C63 C 0.5209(2) 0.5039(2) 0.5853(2) 0.0370(8) Uani 1 1 d . . . . .
H63 H 0.4848 0.4688 0.5741 0.044 Uiso 1 1 calc R U . . .
C64 C 0.4949(2) 0.5577(2) 0.6155(2) 0.0365(8) Uani 1 1 d . . . . .
H64 H 0.4407 0.5596 0.6247 0.044 Uiso 1 1 calc R U . . .
C65 C 0.5480(2) 0.60771(18) 0.63172(19) 0.0314(7) Uani 1 1 d . . . . .
H65 H 0.5310 0.6446 0.6523 0.038 Uiso 1 1 calc R U . . .
C66 C 0.62755(18) 0.60428(15) 0.61781(16) 0.0233(5) Uani 1 1 d . . . . .
C67 C 0.68970(18) 0.65329(14) 0.63418(15) 0.0222(5) Uani 1 1 d . . . . .
C68 C 0.6824(2) 0.70986(15) 0.66814(17) 0.0263(6) Uani 1 1 d . . . . .
H68 H 0.6321 0.7202 0.6818 0.032 Uiso 1 1 calc R U . . .
C69 C 0.7492(2) 0.75111(15) 0.68194(18) 0.0280(6) Uani 1 1 d . . . . .
H69 H 0.7451 0.7897 0.7053 0.034 Uiso 1 1 calc R U . . .
C70 C 0.82243(19) 0.73554(14) 0.66132(16) 0.0239(5) Uani 1 1 d . . . . .
H70 H 0.8684 0.7635 0.6706 0.029 Uiso 1 1 calc R U . . .
C71 C 0.82765(17) 0.67904(13) 0.62714(14) 0.0193(5) Uani 1 1 d . . . . .
N72 N 0.76222(15) 0.63709(11) 0.61432(12) 0.0191(4) Uani 1 1 d . . . . .
C73 C 0.89769(17) 0.65642(13) 0.60082(14) 0.0196(5) Uani 1 1 d . . . . .
C74 C 0.97244(19) 0.68913(15) 0.60675(17) 0.0253(6) Uani 1 1 d . . . . .
H74 H 0.9804 0.7284 0.6303 0.030 Uiso 1 1 calc R U . . .
C75 C 1.0347(2) 0.66377(17) 0.57794(18) 0.0287(6) Uani 1 1 d . . . . .
H75 H 1.0860 0.6853 0.5816 0.034 Uiso 1 1 calc R U . . .
C76 C 1.0209(2) 0.60599(17) 0.54334(18) 0.0297(6) Uani 1 1 d . . . . .
H76 H 1.0623 0.5882 0.5224 0.036 Uiso 1 1 calc R U . . .
C77 C 0.94730(19) 0.57527(15) 0.53991(17) 0.0252(6) Uani 1 1 d . . . . .
H77 H 0.9394 0.5357 0.5170 0.030 Uiso 1 1 calc R U . . .
N78 N 0.88453(15) 0.59865(11) 0.56780(12) 0.0198(4) Uani 1 1 d . . . . .
C111 C 0.0857(5) 0.6570(4) 1.0726(3) 0.083(2) Uani 1 1 d . . . . .
H11A H 0.1450 0.6579 1.0947 0.099 Uiso 1 1 calc R U . . .
H11B H 0.0539 0.6735 1.1058 0.099 Uiso 1 1 calc R U . . .
Cl12 Cl 0.06959(19) 0.70725(12) 1.00059(10) 0.1217(9) Uani 1 1 d . . . . .
Cl13 Cl 0.05601(10) 0.57793(9) 1.05263(7) 0.0702(4) Uani 1 1 d . . . . .
C121 C 0.4651(3) 0.3577(3) 0.9643(3) 0.0550(12) Uani 1 1 d . . . . .
H12A H 0.4827 0.3754 0.9236 0.066 Uiso 1 1 calc R U . . .
H12B H 0.4969 0.3184 0.9775 0.066 Uiso 1 1 calc R U . . .
Cl22 Cl 0.48707(12) 0.41249(7) 1.03175(9) 0.0757(4) Uani 1 1 d . . . . .
Cl23 Cl 0.35906(9) 0.33992(7) 0.94358(8) 0.0634(3) Uani 1 1 d . . . . .
C131 C 0.9346(3) 0.7610(2) 0.3776(2) 0.0409(8) Uani 1 1 d . . . . .
H13A H 0.9272 0.7509 0.3284 0.049 Uiso 1 1 calc R U . . .
H13B H 0.9285 0.8073 0.3822 0.049 Uiso 1 1 calc R U . . .
Cl32 Cl 0.85753(7) 0.72157(6) 0.41206(8) 0.0547(3) Uani 1 1 d . . . . .
Cl33 Cl 1.03487(6) 0.73764(5) 0.42025(6) 0.0422(2) Uani 1 1 d . . . . .
C141 C 0.6592(2) 0.6601(2) 0.8402(2) 0.0401(8) Uani 1 1 d . . . . .
H14A H 0.6160 0.6800 0.8049 0.048 Uiso 1 1 calc R U . . .
H14B H 0.6329 0.6452 0.8776 0.048 Uiso 1 1 calc R U . . .
Cl42 Cl 0.73638(6) 0.71664(5) 0.87244(6) 0.0429(2) Uani 1 1 d . . . . .
Cl43 Cl 0.70281(6) 0.59469(5) 0.80430(5) 0.03885(19) Uani 1 1 d . . . . .
C151 C 0.5934(5) 0.3593(5) 0.6761(3) 0.081(4) Uani 0.668(2) 1 d D . P A 1
H15A H 0.5944 0.3212 0.7050 0.097 Uiso 0.668(2) 1 calc R U P A 1
H15B H 0.5389 0.3798 0.6728 0.097 Uiso 0.668(2) 1 calc R U P A 1
Cl52 Cl 0.6029(2) 0.33574(11) 0.59546(16) 0.0881(9) Uani 0.668(2) 1 d D . P A 1
Cl53 Cl 0.66942(14) 0.4111(2) 0.71625(14) 0.0851(10) Uani 0.668(2) 1 d D . P A 1
C154 C 0.5932(9) 0.3934(11) 0.697(2) 0.081(4) Uani 0.179(2) 1 d D . P B 2
H15C H 0.5478 0.4115 0.6625 0.097 Uiso 0.179(2) 1 calc R U P B 2
H15D H 0.5688 0.3747 0.7340 0.097 Uiso 0.179(2) 1 calc R U P B 2
Cl55 Cl 0.6615(6) 0.4524(5) 0.7307(5) 0.0851(10) Uani 0.179(2) 1 d D . P B 2
Cl56 Cl 0.6427(9) 0.3352(4) 0.6604(6) 0.0881(9) Uani 0.179(2) 1 d D . P B 2
C157 C 0.5561(9) 0.338(3) 0.6270(7) 0.081(4) Uani 0.153(2) 1 d D . P C 3
H15E H 0.5245 0.3691 0.6489 0.097 Uiso 0.153(2) 1 calc R U P C 3
H15F H 0.5425 0.2954 0.6411 0.097 Uiso 0.153(2) 1 calc R U P C 3
Cl58 Cl 0.5255(7) 0.3449(5) 0.5397(5) 0.0881(9) Uani 0.153(2) 1 d D . P C 3
Cl59 Cl 0.6601(6) 0.3517(8) 0.6559(6) 0.0851(10) Uani 0.153(2) 1 d D . P C 3
 
loop_
 _atom_site_aniso_label
 _atom_site_aniso_U_11
 _atom_site_aniso_U_22
 _atom_site_aniso_U_33
 _atom_site_aniso_U_23
 _atom_site_aniso_U_13
 _atom_site_aniso_U_12
Re1 0.01991(5) 0.01849(5) 0.02105(5) 0.00091(4) 0.00121(4) -0.00233(4)
Re2 0.01684(5) 0.01729(5) 0.01797(5) -0.00072(3) 0.00193(3) -0.00132(3)
Cl1 0.0267(3) 0.0222(3) 0.0444(4) -0.0006(3) 0.0131(3) 0.0033(3)
Cl2 0.0302(4) 0.0214(3) 0.0594(6) -0.0038(3) -0.0110(4) 0.0034(3)
N1 0.0216(11) 0.0228(11) 0.0207(11) 0.0001(9) 0.0023(9) -0.0043(9)
C2 0.0355(17) 0.0311(16) 0.0242(14) 0.0030(12) 0.0009(12) -0.0032(13)
C3 0.043(2) 0.044(2) 0.0259(16) -0.0005(14) -0.0017(14) -0.0063(16)
C4 0.0397(19) 0.0364(19) 0.0364(19) -0.0091(15) -0.0018(15) -0.0088(15)
C5 0.0356(17) 0.0282(15) 0.0324(16) -0.0032(13) 0.0034(13) -0.0100(13)
C6 0.0251(13) 0.0229(13) 0.0257(14) 0.0011(10) 0.0037(11) -0.0049(10)
C7 0.0268(14) 0.0227(13) 0.0279(14) 0.0035(11) 0.0034(11) -0.0037(11)
C8 0.0395(18) 0.0255(15) 0.0375(18) 0.0054(13) 0.0062(15) -0.0072(13)
C9 0.048(2) 0.0334(18) 0.0364(19) 0.0132(15) 0.0033(16) -0.0053(16)
C10 0.0415(19) 0.0387(19) 0.0297(17) 0.0105(14) 0.0033(14) -0.0027(15)
C11 0.0296(15) 0.0307(16) 0.0253(14) 0.0043(12) 0.0028(12) -0.0008(12)
N12 0.0236(11) 0.0230(11) 0.0228(11) 0.0005(9) 0.0017(9) -0.0019(9)
C13 0.0289(15) 0.0359(17) 0.0218(13) -0.0036(12) 0.0007(11) -0.0041(13)
C14 0.0370(18) 0.048(2) 0.0249(16) 0.0024(14) -0.0024(13) -0.0024(16)
C15 0.044(2) 0.058(3) 0.0295(18) -0.0100(17) -0.0034(16) -0.0121(19)
C16 0.047(2) 0.048(2) 0.037(2) -0.0144(17) 0.0013(17) -0.0174(18)
C17 0.0391(19) 0.0337(18) 0.0337(17) -0.0063(14) -0.0001(14) -0.0106(15)
N18 0.0246(12) 0.0274(13) 0.0268(13) -0.0025(10) 0.0017(10) -0.0036(10)
N21 0.0223(11) 0.0263(12) 0.0234(12) -0.0016(9) 0.0027(9) -0.0030(9)
C22 0.0263(15) 0.0347(17) 0.0310(16) 0.0001(13) 0.0069(12) -0.0042(12)
C23 0.0248(15) 0.044(2) 0.0388(19) 0.0003(15) 0.0104(13) -0.0036(14)
C24 0.0222(14) 0.046(2) 0.0361(18) -0.0017(15) 0.0078(12) 0.0053(13)
C25 0.0247(14) 0.0328(16) 0.0292(15) -0.0008(12) 0.0031(12) 0.0050(12)
C26 0.0208(12) 0.0266(14) 0.0221(12) -0.0021(10) 0.0018(10) 0.0003(10)
C27 0.0218(12) 0.0196(12) 0.0209(12) -0.0018(9) 0.0007(10) 0.0007(9)
C28 0.0226(13) 0.0228(13) 0.0254(13) -0.0001(10) 0.0011(10) 0.0023(10)
C29 0.0284(14) 0.0216(13) 0.0284(15) 0.0032(11) 0.0022(11) -0.0006(11)
C30 0.0223(13) 0.0220(13) 0.0268(14) 0.0009(10) 0.0032(10) -0.0014(10)
C31 0.0193(11) 0.0181(11) 0.0223(12) 0.0007(9) 0.0020(9) -0.0002(9)
N32 0.0180(10) 0.0198(10) 0.0218(11) -0.0021(8) 0.0009(8) -0.0007(8)
C33 0.0221(12) 0.0171(11) 0.0224(12) -0.0025(9) 0.0015(10) -0.0008(9)
C34 0.0231(13) 0.0224(13) 0.0320(15) -0.0001(11) 0.0048(11) 0.0001(10)
C35 0.0238(14) 0.0281(15) 0.0410(18) -0.0032(13) 0.0089(13) 0.0026(11)
C36 0.0284(15) 0.0219(14) 0.0451(19) -0.0016(13) 0.0042(14) 0.0063(12)
C37 0.0278(15) 0.0200(13) 0.0375(17) 0.0021(12) 0.0025(12) 0.0016(11)
N38 0.0223(11) 0.0172(10) 0.0263(12) -0.0004(9) 0.0017(9) -0.0002(8)
N41 0.0202(10) 0.0216(11) 0.0226(11) 0.0000(9) 0.0005(9) -0.0025(9)
C42 0.0344(16) 0.0246(14) 0.0282(15) 0.0040(12) -0.0001(12) 0.0011(12)
C43 0.044(2) 0.0316(17) 0.0342(18) 0.0102(14) -0.0049(15) 0.0023(15)
C44 0.0369(18) 0.0373(18) 0.0274(16) 0.0063(13) -0.0052(13) -0.0010(14)
C45 0.0267(14) 0.0313(15) 0.0216(13) 0.0008(11) -0.0025(11) -0.0025(12)
C46 0.0166(11) 0.0276(13) 0.0205(12) 0.0001(10) 0.0012(9) -0.0018(10)
C47 0.0188(12) 0.0239(13) 0.0208(12) -0.0018(10) 0.0029(9) -0.0004(10)
C48 0.0218(13) 0.0305(15) 0.0248(14) -0.0030(11) 0.0042(10) -0.0005(11)
C49 0.0267(14) 0.0265(14) 0.0302(15) -0.0088(12) 0.0037(12) 0.0001(11)
C50 0.0246(13) 0.0226(13) 0.0293(15) -0.0010(11) 0.0043(11) 0.0012(10)
C51 0.0195(12) 0.0217(12) 0.0229(12) 0.0013(10) 0.0044(10) 0.0007(9)
N52 0.0169(10) 0.0207(10) 0.0192(10) -0.0008(8) 0.0025(8) -0.0009(8)
C53 0.0240(13) 0.0205(12) 0.0225(13) 0.0019(10) 0.0042(10) 0.0004(10)
C54 0.0331(16) 0.0252(14) 0.0265(14) 0.0033(11) 0.0006(12) 0.0035(12)
C55 0.0401(19) 0.0339(17) 0.0270(16) 0.0067(13) -0.0008(13) 0.0036(14)
C56 0.044(2) 0.0367(18) 0.0232(15) 0.0017(13) -0.0037(14) -0.0008(15)
C57 0.0349(16) 0.0306(16) 0.0211(13) -0.0007(11) -0.0019(12) -0.0015(13)
N58 0.0223(11) 0.0230(11) 0.0206(11) 0.0001(9) 0.0022(9) -0.0015(9)
N61 0.0192(10) 0.0238(11) 0.0247(11) 0.0008(9) 0.0023(9) -0.0024(9)
C62 0.0257(14) 0.0275(15) 0.0378(17) -0.0036(13) 0.0073(13) -0.0079(12)
C63 0.0258(15) 0.0404(19) 0.045(2) -0.0075(16) 0.0088(14) -0.0104(14)
C64 0.0215(14) 0.048(2) 0.0409(19) -0.0048(16) 0.0085(13) -0.0089(14)
C65 0.0222(14) 0.0373(17) 0.0363(17) -0.0057(14) 0.0100(12) -0.0007(12)
C66 0.0190(12) 0.0266(14) 0.0244(13) 0.0018(11) 0.0047(10) -0.0010(10)
C67 0.0197(12) 0.0241(13) 0.0225(12) 0.0002(10) 0.0039(10) 0.0006(10)
C68 0.0254(14) 0.0253(14) 0.0295(15) -0.0039(11) 0.0088(11) 0.0012(11)
C69 0.0269(14) 0.0238(14) 0.0332(16) -0.0056(12) 0.0064(12) 0.0015(11)
C70 0.0249(13) 0.0196(12) 0.0270(14) -0.0017(10) 0.0044(11) -0.0017(10)
C71 0.0185(11) 0.0192(11) 0.0198(11) -0.0006(9) 0.0027(9) -0.0006(9)
N72 0.0192(10) 0.0201(10) 0.0177(10) 0.0008(8) 0.0029(8) 0.0002(8)
C73 0.0202(11) 0.0190(11) 0.0192(11) 0.0000(9) 0.0029(9) -0.0013(9)
C74 0.0219(13) 0.0247(13) 0.0292(14) -0.0011(11) 0.0052(11) -0.0049(10)
C75 0.0216(13) 0.0311(15) 0.0341(16) -0.0006(13) 0.0077(12) -0.0040(11)
C76 0.0277(15) 0.0300(15) 0.0343(16) -0.0041(13) 0.0131(13) -0.0014(12)
C77 0.0247(13) 0.0250(13) 0.0271(14) -0.0043(11) 0.0078(11) -0.0018(11)
N78 0.0205(10) 0.0197(10) 0.0193(10) -0.0012(8) 0.0041(8) -0.0007(8)
C111 0.082(5) 0.111(6) 0.052(3) 0.002(3) 0.005(3) -0.023(4)
Cl12 0.186(3) 0.1041(16) 0.0597(10) 0.0064(10) -0.0101(13) -0.0476(16)
Cl13 0.0659(9) 0.0939(11) 0.0488(7) 0.0055(7) 0.0068(6) 0.0054(8)
C121 0.057(3) 0.062(3) 0.043(2) 0.004(2) 0.003(2) -0.003(2)
Cl22 0.0977(12) 0.0461(7) 0.0755(10) -0.0066(7) -0.0007(9) -0.0080(7)
Cl23 0.0506(7) 0.0674(8) 0.0656(8) 0.0075(6) -0.0039(6) 0.0040(6)
C131 0.0372(19) 0.041(2) 0.043(2) 0.0052(17) 0.0042(16) 0.0037(16)
Cl32 0.0460(6) 0.0422(5) 0.0827(9) 0.0006(5) 0.0289(6) 0.0012(4)
Cl33 0.0375(5) 0.0431(5) 0.0435(5) 0.0007(4) 0.0025(4) 0.0025(4)
C141 0.0308(17) 0.043(2) 0.046(2) 0.0059(17) 0.0090(15) 0.0090(15)
Cl42 0.0403(5) 0.0413(5) 0.0480(5) -0.0025(4) 0.0109(4) 0.0048(4)
Cl43 0.0421(5) 0.0383(4) 0.0349(4) 0.0049(3) 0.0049(4) 0.0054(4)
C151 0.061(5) 0.102(9) 0.090(8) 0.037(7) 0.038(5) 0.007(6)
Cl52 0.130(2) 0.0463(10) 0.1049(19) 0.0170(12) 0.0630(18) 0.0072(12)
Cl53 0.0459(9) 0.130(3) 0.0772(15) 0.0571(18) 0.0082(9) -0.0126(15)
C154 0.061(5) 0.102(9) 0.090(8) 0.037(7) 0.038(5) 0.007(6)
Cl55 0.0459(9) 0.130(3) 0.0772(15) 0.0571(18) 0.0082(9) -0.0126(15)
Cl56 0.130(2) 0.0463(10) 0.1049(19) 0.0170(12) 0.0630(18) 0.0072(12)
C157 0.061(5) 0.102(9) 0.090(8) 0.037(7) 0.038(5) 0.007(6)
Cl58 0.130(2) 0.0463(10) 0.1049(19) 0.0170(12) 0.0630(18) 0.0072(12)
Cl59 0.0459(9) 0.130(3) 0.0772(15) 0.0571(18) 0.0082(9) -0.0126(15)
 
_geom_special_details
;
 All esds (except the esd in the dihedral angle between two l.s. planes)
 are estimated using the full covariance matrix.  The cell esds are taken
 into account individually in the estimation of esds in distances, angles
 and torsion angles; correlations between esds in cell parameters are only
 used when they are defined by crystal symmetry.  An approximate (isotropic)
 treatment of cell esds is used for estimating esds involving l.s. planes.
;
 
loop_
 _geom_bond_atom_site_label_1
 _geom_bond_atom_site_label_2
 _geom_bond_distance
 _geom_bond_site_symmetry_2
 _geom_bond_publ_flag
Re1 N12 1.998(3) . ?
Re1 N32 1.998(3) . ?
Re1 N1 2.064(3) . ?
Re1 N18 2.067(3) . ?
Re1 N38 2.071(3) . ?
Re1 N21 2.074(3) . ?
Re2 N52 1.995(2) . ?
Re2 N72 2.000(2) . ?
Re2 N41 2.069(3) . ?
Re2 N58 2.071(3) . ?
Re2 N78 2.075(2) . ?
Re2 N61 2.079(3) . ?
N1 C2 1.362(4) . ?
N1 C6 1.382(4) . ?
C2 C3 1.362(5) . ?
C3 C4 1.384(6) . ?
C4 C5 1.382(5) . ?
C5 C6 1.398(5) . ?
C6 C7 1.447(5) . ?
C7 N12 1.387(4) . ?
C7 C8 1.394(5) . ?
C8 C9 1.391(5) . ?
C9 C10 1.390(6) . ?
C10 C11 1.394(5) . ?
C11 N12 1.388(4) . ?
C11 C13 1.434(5) . ?
C13 N18 1.375(5) . ?
C13 C14 1.418(5) . ?
C14 C15 1.381(6) . ?
C15 C16 1.386(7) . ?
C16 C17 1.379(5) . ?
C17 N18 1.366(4) . ?
N21 C22 1.360(4) . ?
N21 C26 1.380(4) . ?
C22 C23 1.379(5) . ?
C23 C24 1.399(6) . ?
C24 C25 1.389(5) . ?
C25 C26 1.397(4) . ?
C26 C27 1.452(4) . ?
C27 N32 1.381(4) . ?
C27 C28 1.388(4) . ?
C28 C29 1.395(5) . ?
C29 C30 1.391(4) . ?
C30 C31 1.400(4) . ?
C31 N32 1.387(4) . ?
C31 C33 1.441(4) . ?
C33 N38 1.387(4) . ?
C33 C34 1.403(4) . ?
C34 C35 1.381(5) . ?
C35 C36 1.399(5) . ?
C36 C37 1.375(5) . ?
C37 N38 1.369(4) . ?
N41 C42 1.372(4) . ?
N41 C46 1.377(4) . ?
C42 C43 1.380(5) . ?
C43 C44 1.396(6) . ?
C44 C45 1.378(5) . ?
C45 C46 1.397(4) . ?
C46 C47 1.451(4) . ?
C47 N52 1.383(4) . ?
C47 C48 1.397(4) . ?
C48 C49 1.392(5) . ?
C49 C50 1.393(5) . ?
C50 C51 1.387(4) . ?
C51 N52 1.385(4) . ?
C51 C53 1.444(4) . ?
C53 N58 1.381(4) . ?
C53 C54 1.398(4) . ?
C54 C55 1.384(5) . ?
C55 C56 1.389(5) . ?
C56 C57 1.377(5) . ?
C57 N58 1.364(4) . ?
N61 C62 1.361(4) . ?
N61 C66 1.381(4) . ?
C62 C63 1.380(5) . ?
C63 C64 1.395(6) . ?
C64 C65 1.370(5) . ?
C65 C66 1.399(4) . ?
C66 C67 1.448(4) . ?
C67 N72 1.380(4) . ?
C67 C68 1.392(4) . ?
C68 C69 1.390(5) . ?
C69 C70 1.394(4) . ?
C70 C71 1.387(4) . ?
C71 N72 1.381(4) . ?
C71 C73 1.446(4) . ?
C73 N78 1.384(4) . ?
C73 C74 1.399(4) . ?
C74 C75 1.386(4) . ?
C75 C76 1.399(5) . ?
C76 C77 1.367(4) . ?
C77 N78 1.366(4) . ?
C111 Cl13 1.763(8) . ?
C111 Cl12 1.765(7) . ?
C121 Cl23 1.757(5) . ?
C121 Cl22 1.759(5) . ?
C131 Cl33 1.772(4) . ?
C131 Cl32 1.774(4) . ?
C141 Cl42 1.770(5) . ?
C141 Cl43 1.777(4) . ?
C151 Cl52 1.725(5) . ?
C151 Cl53 1.734(5) . ?
C154 Cl55 1.723(5) . ?
C154 Cl56 1.723(5) . ?
C157 Cl59 1.719(5) . ?
C157 Cl58 1.721(5) . ?
 
loop_
 _geom_angle_atom_site_label_1
 _geom_angle_atom_site_label_2
 _geom_angle_atom_site_label_3
 _geom_angle
 _geom_angle_site_symmetry_1
 _geom_angle_site_symmetry_3
 _geom_angle_publ_flag
N12 Re1 N32 178.26(10) . . ?
N12 Re1 N1 76.96(10) . . ?
N32 Re1 N1 101.44(10) . . ?
N12 Re1 N18 76.50(11) . . ?
N32 Re1 N18 105.10(11) . . ?
N1 Re1 N18 153.45(11) . . ?
N12 Re1 N38 103.83(10) . . ?
N32 Re1 N38 76.88(10) . . ?
N1 Re1 N38 93.95(10) . . ?
N18 Re1 N38 91.77(11) . . ?
N12 Re1 N21 102.52(11) . . ?
N32 Re1 N21 76.75(10) . . ?
N1 Re1 N21 90.92(10) . . ?
N18 Re1 N21 95.37(11) . . ?
N38 Re1 N21 153.63(10) . . ?
N52 Re2 N72 176.21(10) . . ?
N52 Re2 N41 76.94(10) . . ?
N72 Re2 N41 101.90(10) . . ?
N52 Re2 N58 76.78(10) . . ?
N72 Re2 N58 104.37(10) . . ?
N41 Re2 N58 153.71(10) . . ?
N52 Re2 N78 107.10(9) . . ?
N72 Re2 N78 76.55(10) . . ?
N41 Re2 N78 95.28(10) . . ?
N58 Re2 N78 91.79(10) . . ?
N52 Re2 N61 99.71(10) . . ?
N72 Re2 N61 76.64(10) . . ?
N41 Re2 N61 90.55(10) . . ?
N58 Re2 N61 94.47(10) . . ?
N78 Re2 N61 153.20(10) . . ?
C2 N1 C6 118.0(3) . . ?
C2 N1 Re1 125.3(2) . . ?
C6 N1 Re1 116.7(2) . . ?
N1 C2 C3 122.6(3) . . ?
C2 C3 C4 120.2(4) . . ?
C5 C4 C3 118.7(3) . . ?
C4 C5 C6 120.0(3) . . ?
N1 C6 C5 120.6(3) . . ?
N1 C6 C7 114.3(3) . . ?
C5 C6 C7 125.1(3) . . ?
N12 C7 C8 121.2(3) . . ?
N12 C7 C6 111.7(3) . . ?
C8 C7 C6 127.0(3) . . ?
C9 C8 C7 119.1(3) . . ?
C10 C9 C8 120.0(3) . . ?
C9 C10 C11 120.3(3) . . ?
N12 C11 C10 120.1(3) . . ?
N12 C11 C13 111.6(3) . . ?
C10 C11 C13 128.3(3) . . ?
C7 N12 C11 119.2(3) . . ?
C7 N12 Re1 120.3(2) . . ?
C11 N12 Re1 120.4(2) . . ?
N18 C13 C14 121.0(3) . . ?
N18 C13 C11 114.5(3) . . ?
C14 C13 C11 124.5(3) . . ?
C15 C14 C13 119.3(4) . . ?
C14 C15 C16 119.3(4) . . ?
C17 C16 C15 119.9(4) . . ?
N18 C17 C16 122.4(4) . . ?
C17 N18 C13 118.1(3) . . ?
C17 N18 Re1 125.0(2) . . ?
C13 N18 Re1 116.8(2) . . ?
C22 N21 C26 117.8(3) . . ?
C22 N21 Re1 125.5(2) . . ?
C26 N21 Re1 116.6(2) . . ?
N21 C22 C23 122.7(3) . . ?
C22 C23 C24 119.6(3) . . ?
C25 C24 C23 118.5(3) . . ?
C24 C25 C26 119.7(3) . . ?
N21 C26 C25 121.5(3) . . ?
N21 C26 C27 114.2(3) . . ?
C25 C26 C27 124.3(3) . . ?
N32 C27 C28 121.3(3) . . ?
N32 C27 C26 111.7(3) . . ?
C28 C27 C26 127.0(3) . . ?
C27 C28 C29 119.6(3) . . ?
C30 C29 C28 120.0(3) . . ?
C29 C30 C31 119.2(3) . . ?
N32 C31 C30 121.1(3) . . ?
N32 C31 C33 111.9(2) . . ?
C30 C31 C33 127.0(3) . . ?
C27 N32 C31 118.9(3) . . ?
C27 N32 Re1 120.7(2) . . ?
C31 N32 Re1 120.39(19) . . ?
N38 C33 C34 121.3(3) . . ?
N38 C33 C31 114.3(3) . . ?
C34 C33 C31 124.3(3) . . ?
C35 C34 C33 119.7(3) . . ?
C34 C35 C36 119.2(3) . . ?
C37 C36 C35 119.4(3) . . ?
N38 C37 C36 123.0(3) . . ?
C37 N38 C33 117.4(3) . . ?
C37 N38 Re1 126.1(2) . . ?
C33 N38 Re1 116.46(19) . . ?
C42 N41 C46 118.0(3) . . ?
C42 N41 Re2 125.2(2) . . ?
C46 N41 Re2 116.8(2) . . ?
N41 C42 C43 122.5(3) . . ?
C42 C43 C44 119.3(3) . . ?
C45 C44 C43 118.9(3) . . ?
C44 C45 C46 120.4(3) . . ?
N41 C46 C45 120.9(3) . . ?
N41 C46 C47 114.0(3) . . ?
C45 C46 C47 125.1(3) . . ?
N52 C47 C48 120.9(3) . . ?
N52 C47 C46 112.0(3) . . ?
C48 C47 C46 127.0(3) . . ?
C49 C48 C47 119.5(3) . . ?
C48 C49 C50 119.5(3) . . ?
C51 C50 C49 120.3(3) . . ?
N52 C51 C50 120.5(3) . . ?
N52 C51 C53 112.1(3) . . ?
C50 C51 C53 127.4(3) . . ?
C47 N52 C51 119.3(2) . . ?
C47 N52 Re2 120.3(2) . . ?
C51 N52 Re2 120.2(2) . . ?
N58 C53 C54 121.3(3) . . ?
N58 C53 C51 113.9(3) . . ?
C54 C53 C51 124.8(3) . . ?
C55 C54 C53 119.7(3) . . ?
C54 C55 C56 119.0(3) . . ?
C57 C56 C55 119.7(3) . . ?
N58 C57 C56 122.7(3) . . ?
C57 N58 C53 117.7(3) . . ?
C57 N58 Re2 125.6(2) . . ?
C53 N58 Re2 116.7(2) . . ?
C62 N61 C66 118.0(3) . . ?
C62 N61 Re2 125.5(2) . . ?
C66 N61 Re2 116.47(19) . . ?
N61 C62 C63 122.4(3) . . ?
C62 C63 C64 119.3(3) . . ?
C65 C64 C63 119.4(3) . . ?
C64 C65 C66 119.7(3) . . ?
N61 C66 C65 121.2(3) . . ?
N61 C66 C67 114.1(3) . . ?
C65 C66 C67 124.7(3) . . ?
N72 C67 C68 121.4(3) . . ?
N72 C67 C66 112.0(3) . . ?
C68 C67 C66 126.6(3) . . ?
C69 C68 C67 119.4(3) . . ?
C68 C69 C70 119.7(3) . . ?
C71 C70 C69 119.6(3) . . ?
N72 C71 C70 121.3(3) . . ?
N72 C71 C73 112.0(2) . . ?
C70 C71 C73 126.8(3) . . ?
C67 N72 C71 118.7(2) . . ?
C67 N72 Re2 120.57(19) . . ?
C71 N72 Re2 120.71(19) . . ?
N78 C73 C74 121.7(3) . . ?
N78 C73 C71 113.9(2) . . ?
C74 C73 C71 124.3(3) . . ?
C75 C74 C73 119.4(3) . . ?
C74 C75 C76 118.9(3) . . ?
C77 C76 C75 119.5(3) . . ?
N78 C77 C76 123.3(3) . . ?
C77 N78 C73 117.1(2) . . ?
C77 N78 Re2 126.1(2) . . ?
C73 N78 Re2 116.79(19) . . ?
Cl13 C111 Cl12 113.4(4) . . ?
Cl23 C121 Cl22 111.2(3) . . ?
Cl33 C131 Cl32 110.9(2) . . ?
Cl42 C141 Cl43 110.5(2) . . ?
Cl52 C151 Cl53 114.8(4) . . ?
Cl55 C154 Cl56 110.7(6) . . ?
Cl59 C157 Cl58 113.3(6) . . ?
 
_refine_diff_density_max    1.945
_refine_diff_density_min   -1.721
_refine_diff_density_rms    0.136

_vrf_PLAT910_8695
;
PROBLEM: Missing # of FCF Reflection(s) Below Th(Min) ...         14 Report
RESPONSE: These reflections a low theta were fully or in part shaded by the 
beam stopper. F(obs) values were zero or very small though F(calc) values were
very high. The reflectons were therefore removed from the refinement. 
;

_shelx_res_file
;
TITL [(tpy)2Re] * 2.5 CH2CL2 (two independent molecules!)
TITL 8695 Mei Wang in P2(1)/n
CELL 0.71073  16.5197  21.126  20.0004  90.000 101.754  90.000
ZERR    8.00   0.0009   0.002   0.0014   0.000   0.005   0.000
LATT  1
SYMM 0.5-X, 0.5+Y, 0.5-Z
SFAC C H N RE CL
UNIT 260 216 48 8 48

OMIT -3 67

TEMP -173

OMIT 1 9 1
OMIT 1 5 1
OMIT 2 0 2

SIZE 0.16 0.09 0.08
L.S. 8

ACTA

BOND
FMAP 2

PLAN 40

DFIX 1.721 0.005 C151 CL52 C151 CL53 C154 CL55 C154 CL56 C157 CL58 C157 CL59
DFIX 2.863 0.01 CL52 CL53 CL55 CL56 CL58 CL59

EADP C151 C154 C157

EADP CL52 CL56 CL58
EADP CL53 CL55 CL59

SUMP 1 0 1 2 1 3 1 4

WGHT    0.031600   21.954397
FVAR       0.04866   0.66799   0.17923   0.15276
RE1   4    0.200772    0.556147    0.843143    11.00000    0.01991    0.01849 =
         0.02105    0.00091    0.00121   -0.00233
RE2   4    0.771051    0.555660    0.565341    11.00000    0.01684    0.01729 =
         0.01797   -0.00072    0.00193   -0.00132
CL1   5    0.499812    0.750363    0.720535    11.00000    0.02666    0.02221 =
         0.04438   -0.00059    0.01309    0.00333
CL2   5    0.507623    0.339683    0.808415    11.00000    0.03025    0.02141 =
         0.05940   -0.00380   -0.01101    0.00342
N1    3    0.147857    0.496976    0.764126    11.00000    0.02159    0.02276 =
         0.02074    0.00009    0.00229   -0.00430
C2    1    0.128516    0.513505    0.696939    11.00000    0.03554    0.03107 =
         0.02422    0.00299    0.00087   -0.00316
AFIX  43
H2    2    0.140127    0.555392    0.684384    11.00000   -1.20000
AFIX   0
C3    1    0.093186    0.472361    0.647036    11.00000    0.04280    0.04373 =
         0.02592   -0.00046   -0.00167   -0.00632
AFIX  43
H3    2    0.081961    0.485501    0.600638    11.00000   -1.20000
AFIX   0
C4    1    0.073599    0.411484    0.663723    11.00000    0.03967    0.03642 =
         0.03638   -0.00908   -0.00181   -0.00884
AFIX  43
H4    2    0.048167    0.382726    0.629269    11.00000   -1.20000
AFIX   0
C5    1    0.091782    0.393346    0.731550    11.00000    0.03555    0.02824 =
         0.03238   -0.00322    0.00343   -0.01003
AFIX  43
H5    2    0.078846    0.351759    0.744105    11.00000   -1.20000
AFIX   0
C6    1    0.129217    0.436226    0.781669    11.00000    0.02513    0.02295 =
         0.02569    0.00112    0.00366   -0.00487
C7    1    0.149515    0.423356    0.854212    11.00000    0.02679    0.02271 =
         0.02786    0.00348    0.00340   -0.00367
C8    1    0.136087    0.367135    0.886786    11.00000    0.03948    0.02552 =
         0.03749    0.00541    0.00618   -0.00718
AFIX  43
H8    2    0.111778    0.331743    0.860965    11.00000   -1.20000
AFIX   0
C9    1    0.158736    0.363522    0.957572    11.00000    0.04754    0.03338 =
         0.03636    0.01317    0.00327   -0.00534
AFIX  43
H9    2    0.149679    0.325558    0.980430    11.00000   -1.20000
AFIX   0
C10   1    0.194614    0.415453    0.994851    11.00000    0.04151    0.03870 =
         0.02968    0.01052    0.00325   -0.00274
AFIX  43
H10   2    0.209786    0.412967    1.043216    11.00000   -1.20000
AFIX   0
C11   1    0.208440    0.471190    0.961570    11.00000    0.02960    0.03073 =
         0.02529    0.00426    0.00282   -0.00077
N12   3    0.185202    0.475430    0.891029    11.00000    0.02358    0.02302 =
         0.02283    0.00054    0.00169   -0.00189
C13   1    0.245930    0.528701    0.990901    11.00000    0.02892    0.03593 =
         0.02183   -0.00363    0.00071   -0.00410
C14   1    0.280185    0.537306    1.061279    11.00000    0.03696    0.04800 =
         0.02487    0.00237   -0.00240   -0.00244
AFIX  43
H14   2    0.278694    0.503915    1.092820    11.00000   -1.20000
AFIX   0
C15   1    0.315730    0.594693    1.083518    11.00000    0.04384    0.05850 =
         0.02945   -0.01004   -0.00340   -0.01208
AFIX  43
H15   2    0.339336    0.601099    1.130455    11.00000   -1.20000
AFIX   0
C16   1    0.316599    0.642866    1.036607    11.00000    0.04681    0.04788 =
         0.03723   -0.01443    0.00128   -0.01744
AFIX  43
H16   2    0.340973    0.682538    1.051275    11.00000   -1.20000
AFIX   0
C17   1    0.282033    0.633105    0.968631    11.00000    0.03906    0.03369 =
         0.03366   -0.00631   -0.00008   -0.01061
AFIX  43
H17   2    0.282266    0.666864    0.937293    11.00000   -1.20000
AFIX   0
N18   3    0.247464    0.576667    0.944704    11.00000    0.02463    0.02742 =
         0.02683   -0.00250    0.00170   -0.00362
N21   3    0.088782    0.601933    0.838901    11.00000    0.02227    0.02629 =
         0.02336   -0.00161    0.00266   -0.00301
C22   1    0.024449    0.579431    0.864880    11.00000    0.02632    0.03468 =
         0.03100    0.00015    0.00694   -0.00425
AFIX  43
H22   2    0.031225    0.540594    0.889327    11.00000   -1.20000
AFIX   0
C23   1   -0.050209    0.610648    0.857208    11.00000    0.02477    0.04402 =
         0.03882    0.00029    0.01036   -0.00356
AFIX  43
H23   2   -0.093625    0.593379    0.876188    11.00000   -1.20000
AFIX   0
C24   1   -0.061659    0.667887    0.821321    11.00000    0.02218    0.04617 =
         0.03606   -0.00166    0.00779    0.00527
AFIX  43
H24   2   -0.112865    0.689792    0.815186    11.00000   -1.20000
AFIX   0
C25   1    0.003468    0.691968    0.794872    11.00000    0.02474    0.03279 =
         0.02915   -0.00080    0.00310    0.00501
AFIX  43
H25   2   -0.002612    0.730946    0.770678    11.00000   -1.20000
AFIX   0
C26   1    0.077990    0.658651    0.803978    11.00000    0.02082    0.02664 =
         0.02207   -0.00210    0.00179    0.00034
C27   1    0.149383    0.678930    0.777506    11.00000    0.02179    0.01964 =
         0.02095   -0.00183    0.00074    0.00066
C28   1    0.156620    0.733708    0.740858    11.00000    0.02260    0.02285 =
         0.02536   -0.00012    0.00106    0.00230
AFIX  43
H28   2    0.111918    0.762788    0.730899    11.00000   -1.20000
AFIX   0
C29   1    0.229953    0.745807    0.718730    11.00000    0.02842    0.02164 =
         0.02836    0.00322    0.00225   -0.00056
AFIX  43
H29   2    0.235529    0.783456    0.694088    11.00000   -1.20000
AFIX   0
C30   1    0.294899    0.702726    0.732763    11.00000    0.02234    0.02197 =
         0.02679    0.00089    0.00315   -0.00135
AFIX  43
H30   2    0.344633    0.710330    0.717168    11.00000   -1.20000
AFIX   0
C31   1    0.286062    0.648013    0.770157    11.00000    0.01929    0.01806 =
         0.02227    0.00070    0.00204   -0.00016
N32   3    0.213633    0.636062    0.792886    11.00000    0.01797    0.01981 =
         0.02185   -0.00212    0.00085   -0.00068
C33   1    0.345569    0.597800    0.788214    11.00000    0.02213    0.01712 =
         0.02238   -0.00253    0.00151   -0.00082
C34   1    0.424347    0.597372    0.772071    11.00000    0.02305    0.02237 =
         0.03197   -0.00007    0.00481    0.00012
AFIX  43
H34   2    0.442268    0.632321    0.748945    11.00000   -1.20000
AFIX   0
C35   1    0.475691    0.545879    0.789977    11.00000    0.02382    0.02812 =
         0.04103   -0.00323    0.00889    0.00264
AFIX  43
H35   2    0.528881    0.544825    0.778804    11.00000   -1.20000
AFIX   0
C36   1    0.448426    0.495298    0.824762    11.00000    0.02836    0.02195 =
         0.04505   -0.00157    0.00423    0.00629
AFIX  43
H36   2    0.482929    0.459490    0.837431    11.00000   -1.20000
AFIX   0
C37   1    0.371213    0.497870    0.840458    11.00000    0.02780    0.01996 =
         0.03755    0.00212    0.00248    0.00160
AFIX  43
H37   2    0.353667    0.463353    0.864442    11.00000   -1.20000
AFIX   0
N38   3    0.318490    0.547941    0.823074    11.00000    0.02229    0.01720 =
         0.02632   -0.00042    0.00170   -0.00021
N41   3    0.721421    0.580025    0.465180    11.00000    0.02016    0.02160 =
         0.02263    0.00003    0.00049   -0.00252
C42   1    0.692334    0.638904    0.443502    11.00000    0.03435    0.02462 =
         0.02817    0.00404   -0.00007    0.00108
AFIX  43
H42   2    0.696649    0.672141    0.476032    11.00000   -1.20000
AFIX   0
C43   1    0.657035    0.651674    0.376210    11.00000    0.04371    0.03164 =
         0.03417    0.01020   -0.00491    0.00233
AFIX  43
H43   2    0.637089    0.692919    0.362955    11.00000   -1.20000
AFIX   0
C44   1    0.650936    0.603354    0.327802    11.00000    0.03689    0.03726 =
         0.02744    0.00629   -0.00522   -0.00095
AFIX  43
H44   2    0.627956    0.611466    0.281070    11.00000   -1.20000
AFIX   0
C45   1    0.678800    0.543701    0.348933    11.00000    0.02672    0.03132 =
         0.02157    0.00081   -0.00247   -0.00246
AFIX  43
H45   2    0.674517    0.510270    0.316635    11.00000   -1.20000
AFIX   0
C46   1    0.713301    0.532137    0.417574    11.00000    0.01657    0.02758 =
         0.02048    0.00013    0.00124   -0.00183
C47   1    0.740687    0.470765    0.446044    11.00000    0.01882    0.02391 =
         0.02075   -0.00181    0.00285   -0.00043
C48   1    0.734783    0.412957    0.411483    11.00000    0.02185    0.03045 =
         0.02483   -0.00298    0.00421   -0.00052
AFIX  43
H48   2    0.714814    0.411482    0.363481    11.00000   -1.20000
AFIX   0
C49   1    0.758380    0.357509    0.447901    11.00000    0.02671    0.02653 =
         0.03016   -0.00884    0.00368    0.00006
AFIX  43
H49   2    0.753317    0.317804    0.425130    11.00000   -1.20000
AFIX   0
C50   1    0.789464    0.360735    0.517976    11.00000    0.02459    0.02259 =
         0.02934   -0.00099    0.00429    0.00117
AFIX  43
H50   2    0.805706    0.323073    0.543092    11.00000   -1.20000
AFIX   0
C51   1    0.796820    0.418687    0.551273    11.00000    0.01954    0.02173 =
         0.02288    0.00133    0.00438    0.00070
N52   3    0.771754    0.473873    0.515597    11.00000    0.01689    0.02067 =
         0.01916   -0.00078    0.00249   -0.00087
C53   1    0.827814    0.430420    0.623049    11.00000    0.02399    0.02051 =
         0.02251    0.00194    0.00416    0.00042
C54   1    0.861490    0.384265    0.670783    11.00000    0.03308    0.02521 =
         0.02647    0.00325    0.00061    0.00350
AFIX  43
H54   2    0.864772    0.341495    0.656907    11.00000   -1.20000
AFIX   0
C55   1    0.890027    0.401171    0.738347    11.00000    0.04011    0.03389 =
         0.02705    0.00667   -0.00077    0.00356
AFIX  43
H55   2    0.912504    0.370182    0.771358    11.00000   -1.20000
AFIX   0
C56   1    0.885285    0.464138    0.757120    11.00000    0.04389    0.03671 =
         0.02322    0.00167   -0.00369   -0.00079
AFIX  43
H56   2    0.904922    0.476682    0.803185    11.00000   -1.20000
AFIX   0
C57   1    0.851982    0.508298    0.708638    11.00000    0.03491    0.03056 =
         0.02112   -0.00072   -0.00187   -0.00145
AFIX  43
H57   2    0.849562    0.551233    0.722217    11.00000   -1.20000
AFIX   0
N58   3    0.822315    0.492908    0.641890    11.00000    0.02227    0.02299 =
         0.02058    0.00014    0.00223   -0.00153
N61   3    0.653337    0.551545    0.587045    11.00000    0.01922    0.02384 =
         0.02474    0.00078    0.00234   -0.00240
C62   1    0.599569    0.502340    0.571799    11.00000    0.02568    0.02752 =
         0.03781   -0.00358    0.00733   -0.00789
AFIX  43
H62   2    0.616797    0.465585    0.551142    11.00000   -1.20000
AFIX   0
C63   1    0.520896    0.503923    0.585272    11.00000    0.02576    0.04045 =
         0.04536   -0.00750    0.00881   -0.01043
AFIX  43
H63   2    0.484842    0.468756    0.574079    11.00000   -1.20000
AFIX   0
C64   1    0.494868    0.557691    0.615493    11.00000    0.02148    0.04804 =
         0.04087   -0.00477    0.00850   -0.00887
AFIX  43
H64   2    0.440750    0.559603    0.624741    11.00000   -1.20000
AFIX   0
C65   1    0.548023    0.607706    0.631719    11.00000    0.02225    0.03727 =
         0.03629   -0.00566    0.01000   -0.00074
AFIX  43
H65   2    0.530960    0.644552    0.652322    11.00000   -1.20000
AFIX   0
C66   1    0.627549    0.604280    0.617810    11.00000    0.01905    0.02659 =
         0.02435    0.00177    0.00473   -0.00097
C67   1    0.689695    0.653289    0.634178    11.00000    0.01973    0.02408 =
         0.02250    0.00021    0.00388    0.00056
C68   1    0.682351    0.709858    0.668143    11.00000    0.02539    0.02528 =
         0.02946   -0.00386    0.00880    0.00117
AFIX  43
H68   2    0.632113    0.720166    0.681763    11.00000   -1.20000
AFIX   0
C69   1    0.749215    0.751110    0.681936    11.00000    0.02693    0.02384 =
         0.03322   -0.00562    0.00641    0.00154
AFIX  43
H69   2    0.745058    0.789745    0.705307    11.00000   -1.20000
AFIX   0
C70   1    0.822426    0.735539    0.661318    11.00000    0.02486    0.01958 =
         0.02697   -0.00173    0.00443   -0.00169
AFIX  43
H70   2    0.868435    0.763455    0.670621    11.00000   -1.20000
AFIX   0
C71   1    0.827654    0.679037    0.627141    11.00000    0.01846    0.01923 =
         0.01979   -0.00063    0.00270   -0.00061
N72   3    0.762218    0.637095    0.614315    11.00000    0.01923    0.02013 =
         0.01768    0.00083    0.00289    0.00021
C73   1    0.897689    0.656425    0.600824    11.00000    0.02016    0.01903 =
         0.01925    0.00003    0.00292   -0.00128
C74   1    0.972441    0.689129    0.606747    11.00000    0.02191    0.02471 =
         0.02923   -0.00110    0.00518   -0.00491
AFIX  43
H74   2    0.980424    0.728395    0.630322    11.00000   -1.20000
AFIX   0
C75   1    1.034742    0.663771    0.577939    11.00000    0.02164    0.03115 =
         0.03412   -0.00062    0.00773   -0.00404
AFIX  43
H75   2    1.085982    0.685255    0.581625    11.00000   -1.20000
AFIX   0
C76   1    1.020892    0.605990    0.543335    11.00000    0.02773    0.03000 =
         0.03429   -0.00410    0.01307   -0.00140
AFIX  43
H76   2    1.062326    0.588216    0.522359    11.00000   -1.20000
AFIX   0
C77   1    0.947299    0.575270    0.539911    11.00000    0.02469    0.02495 =
         0.02707   -0.00429    0.00785   -0.00180
AFIX  43
H77   2    0.939428    0.535678    0.516983    11.00000   -1.20000
AFIX   0
N78   3    0.884535    0.598652    0.567804    11.00000    0.02046    0.01971 =
         0.01934   -0.00120    0.00415   -0.00066
C111  1    0.085660    0.657005    1.072567    11.00000    0.08169    0.11060 =
         0.05205    0.00180    0.00524   -0.02293
AFIX  23
H11A  2    0.144981    0.657929    1.094717    11.00000   -1.20000
H11B  2    0.053890    0.673475    1.105789    11.00000   -1.20000
AFIX   0
CL12  5    0.069589    0.707253    1.000589    11.00000    0.18646    0.10410 =
         0.05969    0.00637   -0.01013   -0.04761
CL13  5    0.056010    0.577932    1.052629    11.00000    0.06589    0.09388 =
         0.04883    0.00554    0.00681    0.00540
C121  1    0.465135    0.357707    0.964259    11.00000    0.05727    0.06157 =
         0.04331    0.00357    0.00328   -0.00250
AFIX  23
H12A  2    0.482674    0.375420    0.923634    11.00000   -1.20000
H12B  2    0.496898    0.318352    0.977503    11.00000   -1.20000
AFIX   0
CL22  5    0.487067    0.412491    1.031751    11.00000    0.09775    0.04611 =
         0.07554   -0.00657   -0.00074   -0.00804
CL23  5    0.359060    0.339920    0.943576    11.00000    0.05059    0.06739 =
         0.06563    0.00747   -0.00393    0.00404
C131  1    0.934602    0.760979    0.377591    11.00000    0.03715    0.04091 =
         0.04281    0.00518    0.00418    0.00366
AFIX  23
H13A  2    0.927213    0.750947    0.328367    11.00000   -1.20000
H13B  2    0.928508    0.807302    0.382193    11.00000   -1.20000
AFIX   0
CL32  5    0.857533    0.721575    0.412057    11.00000    0.04603    0.04219 =
         0.08269    0.00059    0.02888    0.00119
CL33  5    1.034868    0.737639    0.420252    11.00000    0.03755    0.04306 =
         0.04348    0.00071    0.00248    0.00252
C141  1    0.659187    0.660102    0.840234    11.00000    0.03077    0.04347 =
         0.04642    0.00594    0.00900    0.00899
AFIX  23
H14A  2    0.615967    0.680001    0.804910    11.00000   -1.20000
H14B  2    0.632881    0.645176    0.877630    11.00000   -1.20000
AFIX   0
CL42  5    0.736383    0.716640    0.872443    11.00000    0.04025    0.04129 =
         0.04797   -0.00249    0.01095    0.00484
CL43  5    0.702809    0.594694    0.804297    11.00000    0.04209    0.03828 =
         0.03493    0.00487    0.00491    0.00538

PART 1
C151  1    0.593429    0.359280    0.676095    21.00000    0.06066    0.10243 =
         0.08972    0.03681    0.03827    0.00662
AFIX  23
H15A  2    0.594433    0.321156    0.705036    21.00000   -1.20000
H15B  2    0.538865    0.379776    0.672796    21.00000   -1.20000
AFIX   0
CL52  5    0.602859    0.335742    0.595455    21.00000    0.12985    0.04631 =
         0.10488    0.01703    0.06304    0.00719
CL53  5    0.669417    0.411075    0.716248    21.00000    0.04592    0.13021 =
         0.07721    0.05713    0.00822   -0.01256

PART 2
C154  1    0.593223    0.393360    0.697256    31.00000    0.06066    0.10243 =
         0.08972    0.03681    0.03827    0.00662
AFIX  23
H15C  2    0.547809    0.411516    0.662527    31.00000   -1.20000
H15D  2    0.568802    0.374673    0.734019    31.00000   -1.20000
AFIX   0
CL55  5    0.661465    0.452429    0.730682    31.00000    0.04592    0.13021 =
         0.07721    0.05713    0.00822   -0.01256
CL56  5    0.642729    0.335177    0.660393    31.00000    0.12985    0.04631 =
         0.10488    0.01703    0.06304    0.00719

PART 3
C157  1    0.556138    0.338389    0.627017    41.00000    0.06066    0.10243 =
         0.08972    0.03681    0.03827    0.00662
AFIX  23
H15E  2    0.524511    0.369120    0.648944    41.00000   -1.20000
H15F  2    0.542512    0.295404    0.641069    41.00000   -1.20000
AFIX   0
CL58  5    0.525517    0.344893    0.539747    41.00000    0.12985    0.04631 =
         0.10488    0.01703    0.06304    0.00719
CL59  5    0.660054    0.351748    0.655917    41.00000    0.04592    0.13021 =
         0.07721    0.05713    0.00822   -0.01256

HKLF 4

REM  8695 Mei Wang in P2(1)/n
REM R1 =  0.0331 for   20708 Fo > 4sig(Fo)  and  0.0484 for all   26005 data
REM    841 parameters refined using     10 restraints

END

WGHT      0.0316     21.9667

REM Highest difference peak  1.945,  deepest hole -1.721,  1-sigma level  0.136
Q1    1   0.2133  0.5440  0.8195  11.00000  0.05    1.95
Q2    1   0.4794  0.3413  0.8410  11.00000  0.05    1.73
Q3    1   0.7537  0.5468  0.5874  11.00000  0.05    1.69
Q4    1   0.7870  0.5420  0.5461  11.00000  0.05    1.67
Q5    1   0.0329  0.6789  1.0322  11.00000  0.05    1.17
Q6    1   0.6914  0.4422  0.7502  11.00000  0.05    1.17
Q7    1   0.1773  0.5756  0.8346  11.00000  0.05    1.10
Q8    1   0.2533  0.5537  1.0280  11.00000  0.05    1.05
Q9    1   0.0930  0.6213  1.0448  11.00000  0.05    0.99
Q10   1   0.1705  0.5573  0.8779  11.00000  0.05    0.99
Q11   1   0.6480  0.4493  0.7139  11.00000  0.05    0.96
Q12   1   0.5256  0.3445  0.7695  11.00000  0.05    0.90
Q13   1   1.0181  0.7802  0.4403  11.00000  0.05    0.90
Q14   1   0.4273  0.4225  1.0132  11.00000  0.05    0.89
Q15   1   0.4680  0.7421  0.6881  11.00000  0.05    0.88
Q16   1   0.6721  0.3714  0.6839  11.00000  0.05    0.87
Q17   1   0.9878  0.7937  0.4377  11.00000  0.05    0.86
Q18   1   0.5880  0.3415  0.6371  11.00000  0.05    0.86
Q19   1   0.4874  0.2904  0.5100  11.00000  0.05    0.85
Q20   1   0.6219  0.3535  0.6359  11.00000  0.05    0.78
Q21   1   0.8264  0.5593  0.7462  11.00000  0.05    0.78
Q22   1   0.7697  0.5994  0.6032  11.00000  0.05    0.76
Q23   1   0.5047  0.3598  0.7257  11.00000  0.05    0.71
Q24   1   0.1037  0.3865  0.6647  11.00000  0.05    0.69
Q25   1   0.5127  0.4154  1.0008  11.00000  0.05    0.69
Q26   1   0.7280  0.5573  0.5080  11.00000  0.05    0.67
Q27   1   0.3703  0.4415  0.8795  11.00000  0.05    0.67
Q28   1   0.3637  0.3068  0.9807  11.00000  0.05    0.62
Q29   1   0.1951  0.5122  0.8777  11.00000  0.05    0.62
Q30   1  -0.0181  0.7627  1.0069  11.00000  0.05    0.61
Q31   1   0.7683  0.3418  0.5654  11.00000  0.05    0.61
Q32   1   0.2120  0.5996  0.8131  11.00000  0.05    0.60
Q33   1   0.4581  0.3385  0.5986  11.00000  0.05    0.60
Q34   1   0.7715  0.5017  0.5291  11.00000  0.05    0.60
Q35   1   1.0193  0.7493  0.3695  11.00000  0.05    0.60
Q36   1   0.1901  0.7479  0.7299  11.00000  0.05    0.59
Q37   1   0.7755  0.5953  0.5316  11.00000  0.05    0.58
Q38   1   0.4337  0.7190  0.5644  11.00000  0.05    0.58
Q39   1   0.9965  0.6791  0.5831  11.00000  0.05    0.58
Q40   1   0.0755  0.7494  0.9921  11.00000  0.05    0.57
;
_shelx_res_checksum   18159

#===END

 
data_7
 
_audit_creation_method            SHELXL-2013
_audit_creation_date              2015-09-22
_audit_block_code                 9623
_chemical_name_systematic
;
 ?
;
_chemical_name_common             ?
_chemical_melting_point           ?
_chemical_formula_moiety           
 '0.78(C20 H21 B N8 O Re), 0.22(C19 H17 B Cl N8 Re)' 
_chemical_formula_sum
 'C19.78 H20.35 B Cl0.22 N8 O0.78 Re' 
_chemical_formula_weight          587.41

loop_
 _atom_type_symbol
 _atom_type_description
 _atom_type_scat_dispersion_real
 _atom_type_scat_dispersion_imag
 _atom_type_scat_source
 'C'  'C'   0.0033   0.0016
 'International Tables Vol C Tables 4.2.6.8 and 6.1.1.4'
 'H'  'H'   0.0000   0.0000
 'International Tables Vol C Tables 4.2.6.8 and 6.1.1.4'
 'B'  'B'   0.0013   0.0007
 'International Tables Vol C Tables 4.2.6.8 and 6.1.1.4'
 'Cl'  'Cl'   0.1484   0.1585
 'International Tables Vol C Tables 4.2.6.8 and 6.1.1.4'
 'N'  'N'   0.0061   0.0033
 'International Tables Vol C Tables 4.2.6.8 and 6.1.1.4'
 'O'  'O'   0.0106   0.0060
 'International Tables Vol C Tables 4.2.6.8 and 6.1.1.4'
 'Re'  'Re'  -1.0185   7.2310
 'International Tables Vol C Tables 4.2.6.8 and 6.1.1.4'
 
_space_group_crystal_system       orthorhombic
_space_group_IT_number            62
_space_group_name_H-M_alt         'P n m a'
_space_group_name_Hall            '-P 2ac 2n'
 
_shelx_space_group_comment
;
The symmetry employed for this shelxl refinement is uniquely defined
by the following loop, which should always be used as a source of
symmetry information in preference to the above space-group names.
They are only intended as comments.
;
 
loop_
 _space_group_symop_operation_xyz
 'x, y, z'
 '-x+1/2, -y, z+1/2'
 'x+1/2, -y+1/2, -z+1/2'
 '-x, y+1/2, -z'
 '-x, -y, -z'
 'x-1/2, y, -z-1/2'
 '-x-1/2, y-1/2, z-1/2'
 'x, -y-1/2, z'
 
_cell_length_a                    14.558(3)
_cell_length_b                    14.386(2)
_cell_length_c                    9.793(2)
_cell_angle_alpha                 90
_cell_angle_beta                  90
_cell_angle_gamma                 90
_cell_volume                      2051.0(7)
_cell_formula_units_Z             4
_cell_measurement_temperature     100(2)
_cell_measurement_reflns_used     9771
_cell_measurement_theta_min       2.8319
_cell_measurement_theta_max       32.3275

loop_
 _exptl_crystal_face_index_h
 _exptl_crystal_face_index_k
 _exptl_crystal_face_index_l
 _exptl_crystal_face_perp_dist
    1.00   -1.00    0.00    0.0400
   -1.00    0.00    0.00    0.1000
    0.00    1.00    0.00    0.0700
    0.00   -1.00    1.00    0.0300
    0.00    1.00   -1.00    0.0400
    1.00   -2.00   -1.00    0.0500
   -1.00    1.00    2.00    0.0700
    1.00    0.00    0.00    0.0500
   -1.00   -2.00   -1.00    0.0700

_exptl_crystal_description        prism
_exptl_crystal_colour             black
_exptl_crystal_density_meas       ? 
_exptl_crystal_density_method     ?              
_exptl_crystal_density_diffrn     1.902          
_exptl_crystal_F_000              1140
_exptl_transmission_factor_min    ?                                             
_exptl_transmission_factor_max    ?                                             
_exptl_crystal_size_max           0.130
_exptl_crystal_size_mid           0.090
_exptl_crystal_size_min           0.090
_exptl_absorpt_coefficient_mu     5.983
_shelx_estimated_absorpt_T_min    0.510
_shelx_estimated_absorpt_T_max    0.615
_exptl_absorpt_correction_type    gaussian
_exptl_absorpt_process_details    'SADABS (Bruker AXS, 2012)' 
_exptl_absorpt_correction_T_min   0.41818
_exptl_absorpt_correction_T_max   0.68579
 
_exptl_special_details
;
 ?
;
 
_diffrn_ambient_temperature       100(2)
_diffrn_radiation_wavelength      0.71073
_diffrn_radiation_type            MoK\a
_diffrn_radiation_source          '1\mS'
_diffrn_radiation_monochromator   'Incoatec Helios mirrors'
_diffrn_measurement_device_type   'Bruker-AXS Kappa Mach3 APEX-II'
_diffrn_measurement_method        'CCD \f- and \w-scans'
_diffrn_detector_area_resol_mean  66.67
_diffrn_reflns_number             62065
_diffrn_reflns_av_unetI/netI      0.0163
_diffrn_reflns_av_R_equivalents   0.0498
_diffrn_reflns_limit_h_min        -21
_diffrn_reflns_limit_h_max        21
_diffrn_reflns_limit_k_min        -21
_diffrn_reflns_limit_k_max        21
_diffrn_reflns_limit_l_min        -14
_diffrn_reflns_limit_l_max        14
_diffrn_reflns_theta_min          2.879
_diffrn_reflns_theta_max          32.345
_diffrn_reflns_theta_full         25.242
_diffrn_measured_fraction_theta_max   0.998
_diffrn_measured_fraction_theta_full  0.997
_diffrn_reflns_Laue_measured_fraction_max    0.998
_diffrn_reflns_Laue_measured_fraction_full   0.997
_diffrn_reflns_point_group_measured_fraction_max   0.998
_diffrn_reflns_point_group_measured_fraction_full  0.997
_reflns_number_total              3781
_reflns_number_gt                 3361
_reflns_threshold_expression      'I > 2\s(I)'
_reflns_Friedel_coverage          0.000
_reflns_Friedel_fraction_max      .
_reflns_Friedel_fraction_full     .
 
_reflns_special_details
;
 Reflections were merged by SHELXL according to the crystal
 class for the calculation of statistics and refinement.
 
 _reflns_Friedel_fraction is defined as the number of unique
 Friedel pairs measured divided by the number that would be
 possible theoretically, ignoring centric projections and
 systematic absences.
;
 
_computing_data_collection        'APEX2 (Bruker AXS, 2005-2013)'
_computing_cell_refinement        'SAINT software (Bruker AXS, 2004)'
_computing_data_reduction         'SAINT software (Bruker AXS, 2004)'
_computing_structure_solution     'SHELXS (G. M. Sheldrick, 2013)'
_computing_structure_refinement   'SHELXL (G. M. Sheldrick, 2013)'
_computing_molecular_graphics     ?
_computing_publication_material   ?
 
_refine_special_details
;
 ?
;
_refine_ls_structure_factor_coef  Fsqd
_refine_ls_matrix_type            full
_refine_ls_weighting_scheme       calc
_refine_ls_weighting_details
;
 w=1/[\s^2^(Fo^2^)+(0.0262P)^2^+3.6606P]
 where P=(Fo^2^+2Fc^2^)/3
;
_atom_sites_solution_primary      direct
_atom_sites_solution_secondary    difmap
_atom_sites_solution_hydrogens    geom
_refine_ls_hydrogen_treatment     constr
_refine_ls_extinction_method      none
_refine_ls_extinction_coef        .
_refine_ls_number_reflns          3781
_refine_ls_number_parameters      157
_refine_ls_number_restraints      0
_refine_ls_R_factor_all           0.0251
_refine_ls_R_factor_gt            0.0212
_refine_ls_wR_factor_ref          0.0551
_refine_ls_wR_factor_gt           0.0520
_refine_ls_goodness_of_fit_ref    1.108
_refine_ls_restrained_S_all       1.108
_refine_ls_shift/su_max           0.000
_refine_ls_shift/su_mean          0.000
 
loop_
 _atom_site_label
 _atom_site_type_symbol
 _atom_site_fract_x
 _atom_site_fract_y
 _atom_site_fract_z
 _atom_site_U_iso_or_equiv
 _atom_site_adp_type
 _atom_site_occupancy
 _atom_site_site_symmetry_order  
 _atom_site_calc_flag
 _atom_site_refinement_flags_posn
 _atom_site_refinement_flags_adp
 _atom_site_refinement_flags_occupancy
 _atom_site_disorder_assembly
 _atom_site_disorder_group
Re Re 0.12395(2) 0.2500 0.08708(2) 0.01266(4) Uani 1 2 d S T P . .
B B 0.0593(2) 0.2500 0.4033(3) 0.0173(6) Uani 1 2 d S T P A .
H1 H 0.0397 0.2500 0.5012 0.021 Uiso 1 2 calc R U P . .
N1 N 0.02138(12) 0.16367(14) 0.32800(18) 0.0172(3) Uani 1 1 d . . . . .
N2 N 0.03684(12) 0.15380(13) 0.19124(18) 0.0159(3) Uani 1 1 d . . . . .
C3 C -0.01370(15) 0.08122(16) 0.1501(2) 0.0207(4) Uani 1 1 d . . . . .
H3 H -0.0169 0.0592 0.0588 0.025 Uiso 1 1 calc R U . . .
C4 C -0.06094(15) 0.04256(17) 0.2605(3) 0.0262(5) Uani 1 1 d . . . . .
H4 H -0.1010 -0.0096 0.2596 0.031 Uiso 1 1 calc R U . . .
C5 C -0.03687(15) 0.09625(18) 0.3704(3) 0.0235(4) Uani 1 1 d . . . . .
H5 H -0.0577 0.0876 0.4615 0.028 Uiso 1 1 calc R U . . .
N21 N 0.16480(18) 0.2500 0.3919(3) 0.0162(4) Uani 1 2 d S T P . .
N22 N 0.20459(16) 0.2500 0.2662(3) 0.0142(4) Uani 1 2 d S T P A .
C23 C 0.29603(19) 0.2500 0.2877(3) 0.0178(5) Uani 1 2 d S T P . .
H23 H 0.3410 0.2500 0.2175 0.021 Uiso 1 2 calc R U P A .
C24 C 0.3156(2) 0.2500 0.4267(3) 0.0196(6) Uani 1 2 d S T P A .
H24 H 0.3743 0.2500 0.4691 0.024 Uiso 1 2 calc R U P . .
C25 C 0.2304(2) 0.2500 0.4897(3) 0.0191(5) Uani 1 2 d S T P A .
H25 H 0.2199 0.2500 0.5854 0.023 Uiso 1 2 calc R U P . .
N31 N 0.21091(12) 0.16225(13) -0.01284(18) 0.0175(3) Uani 1 1 d . . . . .
C32 C 0.21301(16) 0.06726(17) 0.0025(3) 0.0242(4) Uani 1 1 d . . . . .
H32 H 0.1738 0.0399 0.0688 0.029 Uiso 1 1 calc R U . . .
C33 C 0.26863(19) 0.0101(2) -0.0725(3) 0.0312(6) Uani 1 1 d . . . . .
H33 H 0.2675 -0.0552 -0.0583 0.037 Uiso 1 1 calc R U . . .
C34 C 0.32721(18) 0.0490(2) -0.1706(3) 0.0342(6) Uani 1 1 d . . . . .
H34 H 0.3659 0.0104 -0.2244 0.041 Uiso 1 1 calc R U . . .
C35 C 0.32791(16) 0.1430(2) -0.1879(3) 0.0296(5) Uani 1 1 d . . . . .
H35 H 0.3667 0.1701 -0.2550 0.035 Uiso 1 1 calc R U . . .
C36 C 0.27152(15) 0.20048(18) -0.1070(2) 0.0204(4) Uani 1 1 d . . . . .
O50 O 0.0276(3) 0.2500 -0.0598(4) 0.0224(6) Uani 0.781(3) 2 d S T P A 1
C51 C 0.0534(3) 0.2500 -0.1975(5) 0.0240(8) Uani 0.781(3) 2 d S T P A 1
H51A H -0.0017 0.2500 -0.2550 0.036 Uiso 0.781(3) 2 calc R U P A 1
H51B H 0.0900 0.1944 -0.2170 0.036 Uiso 0.3907(16) 1 calc R U P A 1
H51C H 0.0900 0.3056 -0.2170 0.036 Uiso 0.3907(16) 1 calc R U P A 1
Cl Cl 0.0329(3) 0.2500 -0.1115(5) 0.0224(6) Uani 0.219(3) 2 d S T P A 2
 
loop_
 _atom_site_aniso_label
 _atom_site_aniso_U_11
 _atom_site_aniso_U_22
 _atom_site_aniso_U_33
 _atom_site_aniso_U_23
 _atom_site_aniso_U_13
 _atom_site_aniso_U_12
Re 0.01169(6) 0.01399(6) 0.01230(6) 0.000 0.00190(3) 0.000
B 0.0146(13) 0.0231(16) 0.0143(13) 0.000 0.0017(10) 0.000
N1 0.0116(7) 0.0223(8) 0.0176(7) 0.0044(7) 0.0026(6) -0.0017(6)
N2 0.0123(7) 0.0169(8) 0.0185(7) 0.0010(6) -0.0006(6) 0.0000(6)
C3 0.0151(8) 0.0180(9) 0.0292(10) -0.0013(8) -0.0043(8) -0.0012(7)
C4 0.0158(9) 0.0211(10) 0.0417(13) 0.0066(10) -0.0030(9) -0.0051(8)
C5 0.0130(8) 0.0278(11) 0.0296(11) 0.0120(9) 0.0026(8) -0.0022(8)
N21 0.0142(11) 0.0214(12) 0.0129(9) 0.000 -0.0001(8) 0.000
N22 0.0108(9) 0.0165(11) 0.0153(10) 0.000 0.0027(8) 0.000
C23 0.0093(11) 0.0193(13) 0.0249(14) 0.000 0.0008(10) 0.000
C24 0.0139(12) 0.0215(14) 0.0234(14) 0.000 -0.0026(10) 0.000
C25 0.0190(13) 0.0221(14) 0.0163(12) 0.000 -0.0026(10) 0.000
N31 0.0144(7) 0.0215(8) 0.0165(7) -0.0035(6) 0.0003(6) 0.0013(7)
C32 0.0209(10) 0.0216(10) 0.0301(11) -0.0050(9) -0.0007(8) 0.0015(8)
C33 0.0239(11) 0.0252(12) 0.0447(15) -0.0137(11) -0.0075(10) 0.0074(9)
C34 0.0207(11) 0.0467(16) 0.0352(13) -0.0227(12) -0.0030(9) 0.0105(11)
C35 0.0170(10) 0.0494(16) 0.0223(10) -0.0085(11) 0.0034(8) 0.0055(10)
C36 0.0123(8) 0.0317(12) 0.0172(8) -0.0026(8) 0.0003(7) 0.0012(8)
O50 0.0133(9) 0.0415(13) 0.0123(17) 0.000 -0.0007(14) 0.000
C51 0.0170(17) 0.034(2) 0.021(2) 0.000 -0.0023(14) 0.000
Cl 0.0133(9) 0.0415(13) 0.0123(17) 0.000 -0.0007(14) 0.000
 
_geom_special_details
;
 All esds (except the esd in the dihedral angle between two l.s. planes)
 are estimated using the full covariance matrix.  The cell esds are taken
 into account individually in the estimation of esds in distances, angles
 and torsion angles; correlations between esds in cell parameters are only
 used when they are defined by crystal symmetry.  An approximate (isotropic)
 treatment of cell esds is used for estimating esds involving l.s. planes.
;
 
loop_
 _geom_bond_atom_site_label_1
 _geom_bond_atom_site_label_2
 _geom_bond_distance
 _geom_bond_site_symmetry_2
 _geom_bond_publ_flag
Re O50 2.010(4) . ?
Re N31 2.0381(18) 8_565 ?
Re N31 2.0381(18) . ?
Re N22 2.111(3) . ?
Re N2 2.1364(18) . ?
Re N2 2.1364(18) 8_565 ?
Re Cl 2.353(5) . ?
B N21 1.539(4) . ?
B N1 1.547(3) . ?
B N1 1.547(3) 8_565 ?
N1 C5 1.354(3) . ?
N1 N2 1.365(2) . ?
N2 C3 1.339(3) . ?
C3 C4 1.397(3) . ?
C4 C5 1.370(4) . ?
N21 C25 1.353(4) . ?
N21 N22 1.360(3) . ?
N22 C23 1.348(4) . ?
C23 C24 1.391(4) . ?
C24 C25 1.384(4) . ?
N31 C32 1.375(3) . ?
N31 C36 1.389(3) . ?
C32 C33 1.369(3) . ?
C33 C34 1.401(5) . ?
C34 C35 1.364(5) . ?
C35 C36 1.409(3) . ?
C36 C36 1.425(5) 8_565 ?
O50 C51 1.400(6) . ?
 
loop_
 _geom_angle_atom_site_label_1
 _geom_angle_atom_site_label_2
 _geom_angle_atom_site_label_3
 _geom_angle
 _geom_angle_site_symmetry_1
 _geom_angle_site_symmetry_3
 _geom_angle_publ_flag
O50 Re N31 95.17(10) . 8_565 ?
O50 Re N31 95.17(10) . . ?
N31 Re N31 76.54(11) 8_565 . ?
O50 Re N22 169.50(13) . . ?
N31 Re N22 93.07(7) 8_565 . ?
N31 Re N22 93.07(7) . . ?
O50 Re N2 85.83(10) . . ?
N31 Re N2 177.73(7) 8_565 . ?
N31 Re N2 101.35(8) . . ?
N22 Re N2 86.17(7) . . ?
O50 Re N2 85.83(10) . 8_565 ?
N31 Re N2 101.35(8) 8_565 8_565 ?
N31 Re N2 177.73(7) . 8_565 ?
N22 Re N2 86.18(7) . 8_565 ?
N2 Re N2 80.75(10) . 8_565 ?
N31 Re Cl 87.31(10) 8_565 . ?
N31 Re Cl 87.31(10) . . ?
N22 Re Cl 179.51(12) . . ?
N2 Re Cl 93.45(10) . . ?
N2 Re Cl 93.45(9) 8_565 . ?
N21 B N1 108.77(17) . . ?
N21 B N1 108.77(17) . 8_565 ?
N1 B N1 106.8(2) . 8_565 ?
C5 N1 N2 109.25(19) . . ?
C5 N1 B 130.8(2) . . ?
N2 N1 B 119.49(18) . . ?
C3 N2 N1 106.61(18) . . ?
C3 N2 Re 133.41(16) . . ?
N1 N2 Re 119.92(14) . . ?
N2 C3 C4 110.3(2) . . ?
C5 C4 C3 104.9(2) . . ?
N1 C5 C4 108.8(2) . . ?
C25 N21 N22 109.9(2) . . ?
C25 N21 B 130.8(3) . . ?
N22 N21 B 119.4(2) . . ?
C23 N22 N21 106.2(2) . . ?
C23 N22 Re 132.8(2) . . ?
N21 N22 Re 121.01(18) . . ?
N22 C23 C24 110.8(3) . . ?
C25 C24 C23 104.7(3) . . ?
N21 C25 C24 108.5(3) . . ?
C32 N31 C36 116.9(2) . . ?
C32 N31 Re 125.22(16) . . ?
C36 N31 Re 117.90(15) . . ?
C33 C32 N31 123.5(2) . . ?
C32 C33 C34 119.2(3) . . ?
C35 C34 C33 119.1(2) . . ?
C34 C35 C36 120.5(3) . . ?
N31 C36 C35 120.7(2) . . ?
N31 C36 C36 113.32(13) . 8_565 ?
C35 C36 C36 125.91(16) . 8_565 ?
C51 O50 Re 120.1(3) . . ?
 
_refine_diff_density_max    1.988
_refine_diff_density_min   -2.848
_refine_diff_density_rms    0.145

_vrf_PLAT972_9623
;
PROBLEM: Check Calcd Residual Density  0.66A From      Re      -2.62 eA-3  
RESPONSE: Three difference peaks between -2.62 and +1.99 eA-3 are found in 
close vicinity of the rhenium center (0.63-0.74 A). This is probably due to 
an imperfect absorption correction and non-perfect modelling of the two 
co-crystallizing comlex species (Re-OMe and Re-Cl).

;

_shelx_res_file
;
TITL 0.78[(tp)Re(bpy)(OMe)] * 0.22[(tp)Re(bpy)(Cl)]
TITL 9623 Mei Wang in Pnma
CELL  0.71073   14.558   14.386    9.793    90.000    90.000    90.000
ZERR        4    0.003    0.002    0.002     0.000     0.000     0.000
LATT   1
SYMM     0.50000 - X ,            - Y ,    0.50000 + Z
SYMM     0.50000 + X ,    0.50000 - Y ,    0.50000 - Z
SYMM             - X ,    0.50000 + Y ,            - Z
SFAC  C H B Cl N O Re
UNIT  79.13 81.38 4 0.87 32 3.13 4

OMIT -3 65

L.S. 8
ACTA

SIZE 0.13 0.09 0.09

OMIT 0 1 1
OMIT 1 0 1
OMIT 2 0 0

TEMP -173

FMAP 2

PLAN 20
BOND

LIST

EADP O50 CL

WGHT    0.026200    3.660600
FVAR       0.08060   0.78133
RE    7    0.123949    0.250000    0.087080    10.50000    0.01169    0.01399 =
         0.01230    0.00000    0.00190    0.00000
B     3    0.059346    0.250000    0.403302    10.50000    0.01458    0.02307 =
         0.01426    0.00000    0.00172    0.00000
AFIX  13
H1    2    0.039710    0.250000    0.501155    10.50000   -1.20000
AFIX   0
N1    5    0.021378    0.163667    0.328004    11.00000    0.01162    0.02232 =
         0.01756    0.00439    0.00262   -0.00173
N2    5    0.036838    0.153801    0.191244    11.00000    0.01226    0.01693 =
         0.01847    0.00102   -0.00058   -0.00001
C3    1   -0.013698    0.081218    0.150061    11.00000    0.01509    0.01799 =
         0.02917   -0.00128   -0.00428   -0.00117
AFIX  43
H3    2   -0.016949    0.059164    0.058751    11.00000   -1.20000
AFIX   0
C4    1   -0.060943    0.042561    0.260483    11.00000    0.01584    0.02109 =
         0.04173    0.00660   -0.00305   -0.00508
AFIX  43
H4    2   -0.101009   -0.009560    0.259573    11.00000   -1.20000
AFIX   0
C5    1   -0.036869    0.096248    0.370405    11.00000    0.01304    0.02783 =
         0.02958    0.01203    0.00258   -0.00219
AFIX  43
H5    2   -0.057661    0.087566    0.461468    11.00000   -1.20000
AFIX   0

N21   5    0.164804    0.250000    0.391882    10.50000    0.01416    0.02136 =
         0.01293    0.00000   -0.00013    0.00000
N22   5    0.204585    0.250000    0.266221    10.50000    0.01083    0.01648 =
         0.01534    0.00000    0.00266    0.00000
C23   1    0.296026    0.250000    0.287746    10.50000    0.00930    0.01927 =
         0.02486    0.00000    0.00079    0.00000
AFIX  43
H23   2    0.341029    0.250000    0.217497    10.50000   -1.20000
AFIX   0
C24   1    0.315551    0.250000    0.426744    10.50000    0.01393    0.02149 =
         0.02343    0.00000   -0.00259    0.00000
AFIX  43
H24   2    0.374264    0.250000    0.469085    10.50000   -1.20000
AFIX   0
C25   1    0.230427    0.250000    0.489691    10.50000    0.01900    0.02207 =
         0.01625    0.00000   -0.00257    0.00000
AFIX  43
H25   2    0.219866    0.250000    0.585420    10.50000   -1.20000
AFIX   0

N31   5    0.210914    0.162254   -0.012842    11.00000    0.01442    0.02152 =
         0.01654   -0.00348    0.00028    0.00129
C32   1    0.213010    0.067263    0.002543    11.00000    0.02092    0.02156 =
         0.03010   -0.00497   -0.00069    0.00155
AFIX  43
H32   2    0.173763    0.039889    0.068796    11.00000   -1.20000
AFIX   0
C33   1    0.268629    0.010065   -0.072513    11.00000    0.02389    0.02517 =
         0.04465   -0.01371   -0.00750    0.00743
AFIX  43
H33   2    0.267536   -0.055247   -0.058275    11.00000   -1.20000
AFIX   0
C34   1    0.327213    0.048980   -0.170620    11.00000    0.02070    0.04671 =
         0.03519   -0.02270   -0.00305    0.01050
AFIX  43
H34   2    0.365895    0.010378   -0.224361    11.00000   -1.20000
AFIX   0
C35   1    0.327911    0.143046   -0.187859    11.00000    0.01701    0.04944 =
         0.02227   -0.00850    0.00335    0.00550
AFIX  43
H35   2    0.366746    0.170057   -0.254966    11.00000   -1.20000
AFIX   0
C36   1    0.271519    0.200479   -0.106970    11.00000    0.01226    0.03168 =
         0.01722   -0.00256    0.00034    0.00116

PART   1
O50   6    0.027557    0.250000   -0.059832    20.50000    0.01331    0.04147 =
         0.01230    0.00000   -0.00074    0.00000
C51   1    0.053400    0.250000   -0.197515    20.50000    0.01696    0.03409 =
         0.02098    0.00000   -0.00229    0.00000
AFIX  33
H51A  2   -0.001701    0.250000   -0.255002    20.50000   -1.50000
H51B  2    0.089997    0.194379   -0.216967    20.50000   -1.50000
H51C  2    0.089997    0.305621   -0.216967    20.50000   -1.50000
AFIX   0
PART   2
CL    4    0.032928    0.250000   -0.111455   -20.50000    0.01331    0.04147 =
         0.01230    0.00000   -0.00074    0.00000

HKLF 4 1 -1.0000  0.0000  0.0000  0.0000  0.0000  1.0000  0.0000  1.0000  0.0000

REM  9623 Mei Wang in Pnma
REM R1 =  0.0212 for    3361 Fo > 4sig(Fo)  and  0.0251 for all    3781 data
REM    157 parameters refined using      0 restraints

END

WGHT      0.0263      3.6616

REM Highest difference peak  1.988,  deepest hole -2.848,  1-sigma level  0.145
Q1    1   0.1212  0.2321  0.1583  11.00000  0.05    1.99
Q2    1   0.1203  0.2266  0.0206  11.00000  0.05    1.79
Q3    1   0.1207  0.2500 -0.2659  10.50000  0.05    1.11
Q4    1   0.1178  0.2500  0.3930  10.50000  0.05    0.94
Q5    1   0.3169  0.0979 -0.2234  11.00000  0.05    0.92
Q6    1   0.3126  0.2500  0.3575  10.50000  0.05    0.89
Q7    1  -0.0372  0.0683  0.3094  11.00000  0.05    0.61
Q8    1  -0.0355  0.0563  0.2058  11.00000  0.05    0.56
Q9    1   0.2464  0.0025  0.0176  11.00000  0.05    0.55
Q10   1   0.0134  0.1126  0.1815  11.00000  0.05    0.52
Q11   1   0.2502  0.0378 -0.0262  11.00000  0.05    0.52
Q12   1   0.2693  0.2500 -0.1194  10.50000  0.05    0.49
Q13   1   0.2933  0.1661 -0.1597  11.00000  0.05    0.47
Q14   1   0.3010  0.0022 -0.1381  11.00000  0.05    0.43
Q15   1   0.1700  0.2500  0.4448  10.50000  0.05    0.43
Q16   1   0.3003  0.0375 -0.1096  11.00000  0.05    0.42
Q17   1   0.2030  0.2198  0.2187  11.00000  0.05    0.42
Q18   1   0.0319  0.1918 -0.0791  11.00000  0.05    0.41
Q19   1   0.0210  0.1531  0.2746  11.00000  0.05    0.41
Q20   1   0.0732  0.2218 -0.0342  11.00000  0.05    0.40
;
_shelx_res_checksum   11008

#===END

 
data_8
 
_audit_creation_method            SHELXL-2013
_audit_creation_date              2014-06-26
_audit_block_code                 WGT-WM-075-02
_chemical_name_systematic
;
 ?
;
_chemical_name_common             ?
_chemical_melting_point           ?
_chemical_compound_source         'methanol, diethylether'
_chemical_formula_moiety          
 'C30 H22 Cl N6 Re, 2(C F3 O3 S)' 
_chemical_formula_sum
 'C32 H22 Cl F6 N6 O6 Re S2' 
_chemical_formula_weight          986.32

loop_
 _atom_type_symbol
 _atom_type_description
 _atom_type_scat_dispersion_real
 _atom_type_scat_dispersion_imag
 _atom_type_scat_source
 'C'  'C'   0.0033   0.0016
 'International Tables Vol C Tables 4.2.6.8 and 6.1.1.4'
 'H'  'H'   0.0000   0.0000
 'International Tables Vol C Tables 4.2.6.8 and 6.1.1.4'
 'N'  'N'   0.0061   0.0033
 'International Tables Vol C Tables 4.2.6.8 and 6.1.1.4'
 'Cl'  'Cl'   0.1484   0.1585
 'International Tables Vol C Tables 4.2.6.8 and 6.1.1.4'
 'Re'  'Re'  -1.0185   7.2310
 'International Tables Vol C Tables 4.2.6.8 and 6.1.1.4'
 'O'  'O'   0.0106   0.0060
 'International Tables Vol C Tables 4.2.6.8 and 6.1.1.4'
 'F'  'F'   0.0171   0.0103
 'International Tables Vol C Tables 4.2.6.8 and 6.1.1.4'
 'S'  'S'   0.1246   0.1234
 'International Tables Vol C Tables 4.2.6.8 and 6.1.1.4'
 
_space_group_crystal_system       monoclinic
_space_group_IT_number            15
_space_group_name_H-M_alt         'C 2/c'
_space_group_name_Hall            '-C 2yc'
 
_shelx_space_group_comment
;
The symmetry employed for this shelxl refinement is uniquely defined
by the following loop, which should always be used as a source of
symmetry information in preference to the above space-group names.
They are only intended as comments.
;
 
loop_
 _space_group_symop_operation_xyz
 'x, y, z'
 '-x, y, -z+1/2'
 'x+1/2, y+1/2, z'
 '-x+1/2, y+1/2, -z+1/2'
 '-x, -y, -z'
 'x, -y, z-1/2'
 '-x+1/2, -y+1/2, -z'
 'x+1/2, -y+1/2, z-1/2'
 
_cell_length_a                    14.1936(15)
_cell_length_b                    12.6799(13)
_cell_length_c                    22.455(3)
_cell_angle_alpha                 90
_cell_angle_beta                  107.152(2)
_cell_angle_gamma                 90
_cell_volume                      3861.6(8)
_cell_formula_units_Z             4
_cell_measurement_temperature     100(2)
_cell_measurement_reflns_used     9853
_cell_measurement_theta_min       2.2125
_cell_measurement_theta_max       33.5105

loop_
 _exptl_crystal_face_index_h
 _exptl_crystal_face_index_k
 _exptl_crystal_face_index_l
 _exptl_crystal_face_perp_dist
    1.00    1.00    0.00    0.0100
   -1.00   -1.00    0.00    0.0300
    1.00   -1.00    0.00    0.0400
   -1.00    1.00    0.00    0.0650
    0.00    0.00    1.00    0.0400
    0.00    0.00   -1.00    0.0650
   -1.00    2.00    3.00    0.0550

_exptl_crystal_description        plate
_exptl_crystal_colour             red
_exptl_crystal_size_max           0.10
_exptl_crystal_size_mid           0.10
_exptl_crystal_size_min           0.04
_exptl_crystal_density_meas       ? 
_exptl_crystal_density_method     ?              
_exptl_crystal_density_diffrn     1.697          
_exptl_crystal_F_000              1928
_exptl_transmission_factor_min    ?                                             
_exptl_transmission_factor_max    ?                                             
_exptl_absorpt_coefficient_mu     3.402
_shelx_estimated_absorpt_T_min    0.727
_shelx_estimated_absorpt_T_max    0.876
_exptl_absorpt_correction_type    gaussian
_exptl_absorpt_process_details    'SADABS (Bruker AXS, 2012)' 
_exptl_absorpt_correction_T_min   0.50093
_exptl_absorpt_correction_T_max   0.77054
 
_exptl_special_details
;
 ?
;
 
_diffrn_ambient_temperature       100(2)
_diffrn_radiation_wavelength      0.71073
_diffrn_radiation_type            MoK\a
_diffrn_source                    '1\mS'
_diffrn_radiation_monochromator   'Incoatec Helios mirrors'
_diffrn_measurement_device_type   'Bruker-AXS Kappa Mach3 APEX-II'
_diffrn_measurement_method        'CCD \f- and \w-scans'
_diffrn_detector_area_resol_mean  66.67
_diffrn_reflns_number             65891
_diffrn_reflns_av_unetI/netI      0.0201
_diffrn_reflns_av_R_equivalents   0.0358
_diffrn_reflns_limit_h_min        -22
_diffrn_reflns_limit_h_max        22
_diffrn_reflns_limit_k_min        -19
_diffrn_reflns_limit_k_max        19
_diffrn_reflns_limit_l_min        -35
_diffrn_reflns_limit_l_max        35
_diffrn_reflns_theta_min          1.898
_diffrn_reflns_theta_max          34.054
_diffrn_reflns_theta_full         25.242
_diffrn_measured_fraction_theta_max   0.999
_diffrn_measured_fraction_theta_full  0.999
_diffrn_reflns_Laue_measured_fraction_max    0.999
_diffrn_reflns_Laue_measured_fraction_full   0.999
_diffrn_reflns_point_group_measured_fraction_max   0.999
_diffrn_reflns_point_group_measured_fraction_full  0.999
_reflns_number_total              7877
_reflns_number_gt                 7385
_reflns_threshold_expression      'I > 2\s(I)'
_reflns_Friedel_coverage          0.000
_reflns_Friedel_fraction_max      .
_reflns_Friedel_fraction_full     .
 
_reflns_special_details
;
 Reflections were merged by SHELXL according to the crystal
 class for the calculation of statistics and refinement.
 
 Structure factors included contributions from the .fab file.
 
 _reflns_Friedel_fraction is defined as the number of unique
 Friedel pairs measured divided by the number that would be
 possible theoretically, ignoring centric projections and
 systematic absences.
;
 
_computing_data_collection        'APEX2 (Bruker AXS, 2005-2013)'
_computing_cell_refinement        'SAINT software (Bruker AXS, 2004)'
_computing_data_reduction         'SAINT software (Bruker AXS, 2004)'
_computing_structure_solution     'SHELXS (G. M. Sheldrick, 2013)'
_computing_structure_refinement   'SHELXL (G. M. Sheldrick, 2013)'
_computing_molecular_graphics     ?
_computing_publication_material   ?
 
_refine_special_details
;
 ?
;
_refine_ls_structure_factor_coef  Fsqd
_refine_ls_matrix_type            full
_refine_ls_weighting_scheme       calc
_refine_ls_weighting_details
;
 w=1/[\s^2^(Fo^2^)+(0.0232P)^2^+2.5904P]
 where P=(Fo^2^+2Fc^2^)/3
;
_atom_sites_solution_primary      heavy
_atom_sites_solution_secondary    difmap
_atom_sites_solution_hydrogens    geom
_refine_ls_hydrogen_treatment     constr
_refine_ls_extinction_method      none
_refine_ls_extinction_coef        .
_refine_ls_number_reflns          7877
_refine_ls_number_parameters      245
_refine_ls_number_restraints      0
_refine_ls_R_factor_all           0.0216
_refine_ls_R_factor_gt            0.0182
_refine_ls_wR_factor_ref          0.0444
_refine_ls_wR_factor_gt           0.0433
_refine_ls_goodness_of_fit_ref    1.066
_refine_ls_restrained_S_all       1.066
_refine_ls_shift/su_max           0.001
_refine_ls_shift/su_mean          0.000
 
loop_
 _atom_site_label
 _atom_site_type_symbol
 _atom_site_fract_x
 _atom_site_fract_y
 _atom_site_fract_z
 _atom_site_U_iso_or_equiv
 _atom_site_adp_type
 _atom_site_occupancy
 _atom_site_site_symmetry_order  
 _atom_site_calc_flag
 _atom_site_refinement_flags_posn
 _atom_site_refinement_flags_adp
 _atom_site_refinement_flags_occupancy
 _atom_site_disorder_assembly
 _atom_site_disorder_group
Re Re 0.0000 0.02934(2) 0.7500 0.01116(2) Uani 1 2 d S T P . .
Cl Cl 0.0000 -0.16140(4) 0.7500 0.01852(8) Uani 1 2 d S T P . .
N1 N 0.09881(8) 0.15690(9) 0.76150(5) 0.01408(19) Uani 1 1 d . . . . .
C2 C 0.11028(11) 0.22845(11) 0.80768(7) 0.0185(2) Uani 1 1 d . . . . .
H2 H 0.0634 0.2305 0.8304 0.022 Uiso 1 1 calc R U . . .
C3 C 0.18813(12) 0.29875(13) 0.82294(8) 0.0247(3) Uani 1 1 d . . . . .
H3 H 0.1939 0.3490 0.8552 0.030 Uiso 1 1 calc R U . . .
C4 C 0.25806(12) 0.29525(13) 0.79053(8) 0.0251(3) Uani 1 1 d . . . . .
H4 H 0.3133 0.3414 0.8015 0.030 Uiso 1 1 calc R U . . .
C5 C 0.24622(10) 0.22392(12) 0.74229(7) 0.0208(3) Uani 1 1 d . . . . .
H5 H 0.2925 0.2213 0.7192 0.025 Uiso 1 1 calc R U . . .
C6 C 0.16555(10) 0.15597(11) 0.72803(6) 0.0159(2) Uani 1 1 d . . . . .
C7 C 0.14138(9) 0.08021(11) 0.67747(6) 0.0154(2) Uani 1 1 d . . . . .
C8 C 0.18885(11) 0.06720(12) 0.63174(7) 0.0193(3) Uani 1 1 d . . . . .
H8 H 0.2476 0.1049 0.6339 0.023 Uiso 1 1 calc R U . . .
C9 C 0.14824(11) -0.00224(13) 0.58275(7) 0.0206(3) Uani 1 1 d . . . . .
H9 H 0.1821 -0.0172 0.5530 0.025 Uiso 1 1 calc R U . . .
C10 C 0.05780(11) -0.04954(12) 0.57778(7) 0.0188(3) Uani 1 1 d . . . . .
H10 H 0.0271 -0.0934 0.5432 0.023 Uiso 1 1 calc R U . . .
C11 C 0.01308(10) -0.03162(10) 0.62414(6) 0.0155(2) Uani 1 1 d . . . . .
N12 N 0.05879(8) 0.02467(9) 0.67606(5) 0.01346(19) Uani 1 1 d . . . . .
C13 C -0.08823(10) -0.05698(11) 0.62075(7) 0.0160(2) Uani 1 1 d . . . . .
C14 C -0.15219(11) -0.11415(12) 0.57269(7) 0.0215(3) Uani 1 1 d . . . . .
H14 H -0.1296 -0.1443 0.5406 0.026 Uiso 1 1 calc R U . . .
C15 C -0.24895(11) -0.12629(13) 0.57239(8) 0.0249(3) Uani 1 1 d . . . . .
H15 H -0.2940 -0.1646 0.5399 0.030 Uiso 1 1 calc R U . . .
C16 C -0.27985(11) -0.08180(13) 0.62017(8) 0.0230(3) Uani 1 1 d . . . . .
H16 H -0.3463 -0.0890 0.6205 0.028 Uiso 1 1 calc R U . . .
C17 C -0.21271(10) -0.02717(11) 0.66702(7) 0.0190(2) Uani 1 1 d . . . . .
H17 H -0.2341 0.0023 0.6997 0.023 Uiso 1 1 calc R U . . .
N18 N -0.11767(8) -0.01405(9) 0.66816(6) 0.0148(2) Uani 1 1 d . . . . .
S20 S 0.02520(2) 0.25905(3) 0.95125(2) 0.01798(6) Uani 1 1 d . . . . .
O21 O -0.04714(8) 0.25055(10) 0.98506(6) 0.0262(2) Uani 1 1 d . . . . .
O22 O -0.00760(9) 0.31823(11) 0.89363(6) 0.0287(3) Uani 1 1 d . . . . .
O23 O 0.07737(9) 0.16283(9) 0.94723(6) 0.0249(2) Uani 1 1 d . . . . .
C24 C 0.11964(12) 0.34348(13) 1.00104(8) 0.0266(3) Uani 1 1 d . . . . .
F25 F 0.19283(8) 0.36017(10) 0.97593(6) 0.0403(3) Uani 1 1 d . . . . .
F26 F 0.08260(10) 0.43691(10) 1.00940(7) 0.0449(3) Uani 1 1 d . . . . .
F27 F 0.15853(9) 0.30030(11) 1.05700(5) 0.0404(3) Uani 1 1 d . . . . .
 
loop_
 _atom_site_aniso_label
 _atom_site_aniso_U_11
 _atom_site_aniso_U_22
 _atom_site_aniso_U_33
 _atom_site_aniso_U_23
 _atom_site_aniso_U_13
 _atom_site_aniso_U_12
Re 0.00943(3) 0.01269(3) 0.01140(3) 0.000 0.00316(2) 0.000
Cl 0.0203(2) 0.01530(19) 0.0191(2) 0.000 0.00440(16) 0.000
N1 0.0136(4) 0.0153(5) 0.0137(5) -0.0001(4) 0.0045(4) -0.0013(4)
C2 0.0207(6) 0.0188(6) 0.0178(6) -0.0033(5) 0.0082(5) -0.0041(5)
C3 0.0287(7) 0.0225(7) 0.0239(7) -0.0064(6) 0.0095(6) -0.0093(6)
C4 0.0242(7) 0.0255(7) 0.0263(7) -0.0039(6) 0.0084(6) -0.0111(6)
C5 0.0179(6) 0.0231(7) 0.0229(7) -0.0003(5) 0.0083(5) -0.0049(5)
C6 0.0136(5) 0.0180(6) 0.0167(6) 0.0006(5) 0.0056(4) -0.0008(4)
C7 0.0126(5) 0.0180(6) 0.0162(6) 0.0007(4) 0.0054(4) 0.0011(4)
C8 0.0168(6) 0.0234(7) 0.0205(6) 0.0005(5) 0.0098(5) 0.0020(5)
C9 0.0218(6) 0.0242(6) 0.0186(6) 0.0003(5) 0.0103(5) 0.0059(5)
C10 0.0208(6) 0.0197(6) 0.0161(6) -0.0020(5) 0.0058(5) 0.0044(5)
C11 0.0157(5) 0.0159(5) 0.0142(5) -0.0007(4) 0.0032(4) 0.0028(4)
N12 0.0117(4) 0.0147(5) 0.0139(5) 0.0003(4) 0.0036(4) 0.0015(4)
C13 0.0150(5) 0.0164(5) 0.0153(6) -0.0011(4) 0.0026(4) 0.0015(4)
C14 0.0201(6) 0.0238(7) 0.0180(6) -0.0056(5) 0.0017(5) -0.0008(5)
C15 0.0195(6) 0.0271(7) 0.0234(7) -0.0055(6) -0.0010(5) -0.0051(5)
C16 0.0146(6) 0.0265(7) 0.0252(7) -0.0021(6) 0.0016(5) -0.0037(5)
C17 0.0139(5) 0.0212(6) 0.0216(6) -0.0003(5) 0.0048(5) -0.0008(5)
N18 0.0124(4) 0.0158(5) 0.0157(5) -0.0001(4) 0.0033(4) 0.0004(4)
S20 0.01513(13) 0.02181(16) 0.01801(15) 0.00351(12) 0.00646(11) 0.00172(11)
O21 0.0191(5) 0.0364(6) 0.0265(6) 0.0076(5) 0.0121(4) 0.0013(4)
O22 0.0257(5) 0.0419(7) 0.0209(5) 0.0119(5) 0.0105(4) 0.0131(5)
O23 0.0265(5) 0.0197(5) 0.0297(6) -0.0004(4) 0.0102(5) 0.0018(4)
C24 0.0217(7) 0.0245(7) 0.0335(9) -0.0025(6) 0.0080(6) 0.0009(6)
F25 0.0248(5) 0.0405(6) 0.0595(8) -0.0015(6) 0.0183(5) -0.0098(5)
F26 0.0427(7) 0.0264(5) 0.0640(9) -0.0148(6) 0.0133(6) 0.0024(5)
F27 0.0325(6) 0.0532(7) 0.0279(6) -0.0044(5) -0.0030(4) 0.0026(5)
 
_geom_special_details
;
 All esds (except the esd in the dihedral angle between two l.s. planes)
 are estimated using the full covariance matrix.  The cell esds are taken
 into account individually in the estimation of esds in distances, angles
 and torsion angles; correlations between esds in cell parameters are only
 used when they are defined by crystal symmetry.  An approximate (isotropic)
 treatment of cell esds is used for estimating esds involving l.s. planes.
;
 
loop_
 _geom_bond_atom_site_label_1
 _geom_bond_atom_site_label_2
 _geom_bond_distance
 _geom_bond_site_symmetry_2
 _geom_bond_publ_flag
Re N12 2.0674(12) 2_556 ?
Re N12 2.0674(12) . ?
Re N1 2.1062(11) . ?
Re N1 2.1062(11) 2_556 ?
Re N18 2.1584(12) . ?
Re N18 2.1585(12) 2_556 ?
Re Cl 2.4186(5) . ?
N1 C2 1.3510(18) . ?
N1 C6 1.3721(17) . ?
C2 C3 1.382(2) . ?
C3 C4 1.394(2) . ?
C4 C5 1.383(2) . ?
C5 C6 1.3927(19) . ?
C6 C7 1.4490(19) . ?
C7 N12 1.3598(17) . ?
C7 C8 1.3942(19) . ?
C8 C9 1.394(2) . ?
C9 C10 1.391(2) . ?
C10 C11 1.388(2) . ?
C11 N12 1.3577(17) . ?
C11 C13 1.453(2) . ?
C13 N18 1.3663(18) . ?
C13 C14 1.392(2) . ?
C14 C15 1.380(2) . ?
C15 C16 1.393(2) . ?
C16 C17 1.380(2) . ?
C17 N18 1.3520(18) . ?
S20 O23 1.4437(12) . ?
S20 O22 1.4486(12) . ?
S20 O21 1.4500(11) . ?
S20 C24 1.8191(17) . ?
C24 F26 1.332(2) . ?
C24 F27 1.332(2) . ?
C24 F25 1.337(2) . ?
 
loop_
 _geom_angle_atom_site_label_1
 _geom_angle_atom_site_label_2
 _geom_angle_atom_site_label_3
 _geom_angle
 _geom_angle_site_symmetry_1
 _geom_angle_site_symmetry_3
 _geom_angle_publ_flag
N12 Re N12 176.72(6) 2_556 . ?
N12 Re N1 109.59(4) 2_556 . ?
N12 Re N1 73.06(4) . . ?
N12 Re N1 73.06(4) 2_556 2_556 ?
N12 Re N1 109.59(4) . 2_556 ?
N1 Re N1 79.66(6) . 2_556 ?
N12 Re N18 106.40(5) 2_556 . ?
N12 Re N18 72.73(5) . . ?
N1 Re N18 128.33(4) . . ?
N1 Re N18 76.78(4) 2_556 . ?
N12 Re N18 72.73(5) 2_556 2_556 ?
N12 Re N18 106.40(5) . 2_556 ?
N1 Re N18 76.78(4) . 2_556 ?
N1 Re N18 128.33(4) 2_556 2_556 ?
N18 Re N18 150.47(6) . 2_556 ?
N12 Re Cl 88.36(3) 2_556 . ?
N12 Re Cl 88.36(3) . . ?
N1 Re Cl 140.17(3) . . ?
N1 Re Cl 140.17(3) 2_556 . ?
N18 Re Cl 75.23(3) . . ?
N18 Re Cl 75.23(3) 2_556 . ?
C2 N1 C6 118.67(12) . . ?
C2 N1 Re 122.35(9) . . ?
C6 N1 Re 117.94(9) . . ?
N1 C2 C3 122.01(13) . . ?
C2 C3 C4 119.36(14) . . ?
C5 C4 C3 119.28(14) . . ?
C4 C5 C6 119.11(13) . . ?
N1 C6 C5 121.49(13) . . ?
N1 C6 C7 113.12(11) . . ?
C5 C6 C7 125.38(13) . . ?
N12 C7 C8 121.47(13) . . ?
N12 C7 C6 111.40(11) . . ?
C8 C7 C6 126.96(13) . . ?
C9 C8 C7 118.60(13) . . ?
C10 C9 C8 119.52(13) . . ?
C11 C10 C9 118.96(14) . . ?
N12 C11 C10 121.43(13) . . ?
N12 C11 C13 112.09(12) . . ?
C10 C11 C13 126.05(13) . . ?
C11 N12 C7 118.86(12) . . ?
C11 N12 Re 120.06(9) . . ?
C7 N12 Re 121.05(9) . . ?
N18 C13 C14 122.17(13) . . ?
N18 C13 C11 113.34(12) . . ?
C14 C13 C11 124.40(13) . . ?
C15 C14 C13 118.85(14) . . ?
C14 C15 C16 119.36(14) . . ?
C17 C16 C15 119.16(14) . . ?
N18 C17 C16 122.49(14) . . ?
C17 N18 C13 117.97(12) . . ?
C17 N18 Re 124.38(10) . . ?
C13 N18 Re 115.30(9) . . ?
O23 S20 O22 114.69(7) . . ?
O23 S20 O21 115.17(7) . . ?
O22 S20 O21 114.55(7) . . ?
O23 S20 C24 103.72(7) . . ?
O22 S20 C24 103.22(8) . . ?
O21 S20 C24 103.24(8) . . ?
F26 C24 F27 107.69(15) . . ?
F26 C24 F25 107.86(15) . . ?
F27 C24 F25 107.80(14) . . ?
F26 C24 S20 111.11(12) . . ?
F27 C24 S20 111.29(12) . . ?
F25 C24 S20 110.93(12) . . ?
 
_refine_diff_density_max    1.170
_refine_diff_density_min   -0.651
_refine_diff_density_rms    0.100

_shelxl_version_number 2013-2

_shelx_res_file
;
TITL [(tpy92ReCl](OTf)2 * Et2O (Solvent removed with SQUEEZE)
TITL 8844 Mei Wang in C2/c ; WGT-WM-075-01
CELL 0.71073  14.1936  12.6799  22.455  90.000 107.152  90.000
ZERR    4.00   0.0015   0.0013   0.003   0.000   0.002   0.000
LATT  7
SYMM -X, Y, 0.5-Z
SFAC C H N CL RE O F S
UNIT 128 88 24 4 4 24 24 8
OMIT -3 69
TEMP -173

SIZE 0.10 0.10 0.04

L.S. 8

ACTA

BOND
FMAP 2
PLAN 50

ABIN
WGHT    0.023200    2.590400
FVAR       0.06064
RE    5    0.000000    0.029339    0.750000    10.50000    0.00943    0.01269 =
         0.01140    0.00000    0.00316    0.00000
CL    4    0.000000   -0.161404    0.750000    10.50000    0.02027    0.01530 =
         0.01907    0.00000    0.00440    0.00000
N1    3    0.098808    0.156896    0.761503    11.00000    0.01357    0.01526 =
         0.01371   -0.00008    0.00451   -0.00131
C2    1    0.110283    0.228447    0.807681    11.00000    0.02070    0.01876 =
         0.01781   -0.00331    0.00820   -0.00407
AFIX  43
H2    2    0.063401    0.230492    0.830354    11.00000   -1.20000
AFIX   0
C3    1    0.188128    0.298750    0.822942    11.00000    0.02865    0.02254 =
         0.02386   -0.00640    0.00946   -0.00928
AFIX  43
H3    2    0.193930    0.348985    0.855215    11.00000   -1.20000
AFIX   0
C4    1    0.258062    0.295249    0.790525    11.00000    0.02417    0.02549 =
         0.02626   -0.00385    0.00841   -0.01108
AFIX  43
H4    2    0.313258    0.341364    0.801456    11.00000   -1.20000
AFIX   0
C5    1    0.246219    0.223923    0.742287    11.00000    0.01793    0.02309 =
         0.02291   -0.00026    0.00832   -0.00485
AFIX  43
H5    2    0.292486    0.221311    0.719182    11.00000   -1.20000
AFIX   0
C6    1    0.165555    0.155969    0.728031    11.00000    0.01365    0.01798 =
         0.01669    0.00063    0.00565   -0.00082
C7    1    0.141378    0.080211    0.677469    11.00000    0.01261    0.01801 =
         0.01620    0.00073    0.00536    0.00106
C8    1    0.188852    0.067200    0.631740    11.00000    0.01684    0.02338 =
         0.02046    0.00055    0.00981    0.00203
AFIX  43
H8    2    0.247635    0.104860    0.633914    11.00000   -1.20000
AFIX   0
C9    1    0.148237   -0.002242    0.582755    11.00000    0.02180    0.02418 =
         0.01861    0.00030    0.01032    0.00589
AFIX  43
H9    2    0.182076   -0.017159    0.552990    11.00000   -1.20000
AFIX   0
C10   1    0.057798   -0.049536    0.577776    11.00000    0.02081    0.01973 =
         0.01614   -0.00202    0.00580    0.00444
AFIX  43
H10   2    0.027112   -0.093403    0.543198    11.00000   -1.20000
AFIX   0
C11   1    0.013085   -0.031621    0.624136    11.00000    0.01569    0.01585 =
         0.01418   -0.00065    0.00320    0.00284
N12   3    0.058792    0.024672    0.676055    11.00000    0.01169    0.01467 =
         0.01391    0.00026    0.00359    0.00153
C13   1   -0.088233   -0.056978    0.620748    11.00000    0.01502    0.01637 =
         0.01526   -0.00110    0.00257    0.00145
C14   1   -0.152192   -0.114147    0.572688    11.00000    0.02007    0.02382 =
         0.01802   -0.00564    0.00169   -0.00075
AFIX  43
H14   2   -0.129638   -0.144296    0.540637    11.00000   -1.20000
AFIX   0
C15   1   -0.248949   -0.126290    0.572391    11.00000    0.01952    0.02712 =
         0.02341   -0.00553   -0.00102   -0.00510
AFIX  43
H15   2   -0.294035   -0.164625    0.539909    11.00000   -1.20000
AFIX   0
C16   1   -0.279853   -0.081803    0.620168    11.00000    0.01458    0.02654 =
         0.02520   -0.00207    0.00156   -0.00371
AFIX  43
H16   2   -0.346322   -0.088980    0.620495    11.00000   -1.20000
AFIX   0
C17   1   -0.212715   -0.027169    0.667023    11.00000    0.01390    0.02123 =
         0.02161   -0.00033    0.00482   -0.00081
AFIX  43
H17   2   -0.234080    0.002348    0.699722    11.00000   -1.20000
AFIX   0
N18   3   -0.117667   -0.014049    0.668161    11.00000    0.01244    0.01582 =
         0.01568   -0.00014    0.00331    0.00035
S20   8    0.025204    0.259055    0.951248    11.00000    0.01513    0.02181 =
         0.01801    0.00351    0.00646    0.00172
O21   6   -0.047139    0.250553    0.985064    11.00000    0.01912    0.03640 =
         0.02650    0.00758    0.01207    0.00127
O22   6   -0.007596    0.318233    0.893630    11.00000    0.02572    0.04192 =
         0.02092    0.01189    0.01053    0.01308
O23   6    0.077367    0.162831    0.947235    11.00000    0.02651    0.01971 =
         0.02966   -0.00036    0.01015    0.00182
C24   1    0.119643    0.343481    1.001044    11.00000    0.02173    0.02447 =
         0.03350   -0.00248    0.00797    0.00091
F25   7    0.192830    0.360171    0.975928    11.00000    0.02478    0.04053 =
         0.05945   -0.00154    0.01830   -0.00984
F26   7    0.082603    0.436915    1.009395    11.00000    0.04275    0.02642 =
         0.06398   -0.01484    0.01332    0.00241
F27   7    0.158529    0.300296    1.057000    11.00000    0.03252    0.05320 =
         0.02787   -0.00437   -0.00300    0.00260

HKLF 4

REM  8844 Mei Wang in C2/c ; WGT-WM-075-01
REM R1 =  0.0182 for    7385 Fo > 4sig(Fo)  and  0.0216 for all    7877 data
REM    245 parameters refined using      0 restraints

END

WGHT      0.0232      2.5980

REM Highest difference peak  1.170,  deepest hole -0.651,  1-sigma level  0.100
Q1    1   0.0000 -0.0320  0.7500  10.50000  0.05    1.17
Q2    1  -0.0416 -0.0009  0.7501  11.00000  0.05    1.01
Q3    1   0.0000  0.0913  0.7500  10.50000  0.05    0.88
Q4    1   0.0407  0.1979  0.9514  11.00000  0.05    0.73
Q5    1   0.0743  0.2927  0.9763  11.00000  0.05    0.72
Q6    1   0.0990 -0.0204  0.5802  11.00000  0.05    0.58
Q7    1  -0.0346 -0.0900  0.7400  11.00000  0.05    0.55
Q8    1   0.4230  0.0489  0.7193  11.00000  0.05    0.54
Q9    1  -0.2032 -0.1194  0.5730  11.00000  0.05    0.51
Q10   1   0.0100  0.2840  0.9184  11.00000  0.05    0.51
Q11   1  -0.2623 -0.1152  0.6008  11.00000  0.05    0.50
Q12   1  -0.0270  0.2552  0.9608  11.00000  0.05    0.48
Q13   1  -0.1210 -0.0935  0.5998  11.00000  0.05    0.48
Q14   1  -0.0390 -0.0516  0.6208  11.00000  0.05    0.48
Q15   1   0.2087  0.1814  0.7424  11.00000  0.05    0.48
Q16   1   0.1662  0.0265  0.6095  11.00000  0.05    0.47
Q17   1   0.4640  0.1024  0.6281  11.00000  0.05    0.47
Q18   1   0.0353 -0.0276  0.5978  11.00000  0.05    0.47
Q19   1   0.0356  0.0011  0.6500  11.00000  0.05    0.46
Q20   1   0.1935  0.3656  1.0075  11.00000  0.05    0.46
Q21   1  -0.4973  0.0560  0.6889  11.00000  0.05    0.44
Q22   1   0.1579  0.0824  0.6533  11.00000  0.05    0.44
Q23   1   0.1524  0.2594  0.8153  11.00000  0.05    0.44
Q24   1  -0.0975 -0.0429  0.6471  11.00000  0.05    0.44
Q25   1   0.0000 -0.2286  0.7500  10.50000  0.05    0.43
Q26   1   0.0620  0.1303  0.7495  11.00000  0.05    0.42
Q27   1   0.1597  0.1077  0.7080  11.00000  0.05    0.42
Q28   1   0.0882  0.0600  0.6715  11.00000  0.05    0.41
Q29   1   0.2383  0.2634  0.7626  11.00000  0.05    0.41
Q30   1  -0.4532  0.0024  0.7199  11.00000  0.05    0.40
Q31   1   0.0484 -0.0177  0.6591  11.00000  0.05    0.40
Q32   1   0.2162  0.2623  0.8369  11.00000  0.05    0.40
Q33   1  -0.0006  0.2615  0.9876  11.00000  0.05    0.39
Q34   1   0.1336  0.1477  0.7474  11.00000  0.05    0.38
Q35   1  -0.0373  0.3155  0.9815  11.00000  0.05    0.38
Q36   1   0.1118  0.4006  1.0093  11.00000  0.05    0.38
Q37   1   0.0783  0.4136  1.0393  11.00000  0.05    0.37
Q38   1   0.0998  0.1992  0.7807  11.00000  0.05    0.37
Q39   1   0.2500  0.2406  0.7795  11.00000  0.05    0.37
Q40   1  -0.0395  0.2051  0.9727  11.00000  0.05    0.37
Q41   1   0.0000  0.1585  0.7500  10.50000  0.05    0.37
Q42   1   0.0333  0.1408  0.9404  11.00000  0.05    0.36
Q43   1   0.1065  0.2903  1.0638  11.00000  0.05    0.36
Q44   1   0.0353  0.3507  0.9174  11.00000  0.05    0.35
Q45   1   0.1105  0.1638  0.9790  11.00000  0.05    0.34
Q46   1  -0.2381 -0.0571  0.6417  11.00000  0.05    0.33
Q47   1  -0.1609 -0.0276  0.6684  11.00000  0.05    0.33
Q48   1   0.1248  0.2406  0.9876  11.00000  0.05    0.33
Q49   1   0.0685  0.1546  0.9894  11.00000  0.05    0.33
Q50   1  -0.0249  0.0191  0.7887  11.00000  0.05    0.33
;
_shelx_res_checksum   98701

#===END
